# Supplementary material for: Transient-axial-chirality controlled asymmetric rhodium-carbene C(sp2)-H functionalization for the synthesis of chiral fluorenes
Source: PubMed Central journal article supplement (PMC7217916; doi:10.1038/s41467-020-16098-8), 2020-05-12
Supplement: 41467_2020_16098_MOESM1_ESM.pdf [file 41467_2020_16098_MOESM1_ESM.pdf]

## **Supplementary Information**

# **Transient-axial-chirality controlled asymmetric rhodium-carbene C(sp<sup>2</sup>)-H functionalization for the synthesis of chiral fluorenes**

Kuiyong Dong *et al*

## Supplementary methods

### General Information

All reactions were performed in 10 ml oven-dried glassware under atmosphere of argon. Analytical thin-layer chromatography was performed using glass plates pre-coated with 200-300 mesh silica gel impregnated with a fluorescent indicator (254 nm). Flash column chromatography was performed using silica gel (300-400 mesh). <sup>1</sup>H NMR and <sup>13</sup>C NMR spectra were recorded in CDCl<sub>3</sub> or DMSO-*d*<sub>6</sub> on a 400 MHz spectrometer; chemical shifts are reported in ppm with the solvent signals as reference, and coupling constants (J) are given in Hertz. The peak information is described as: br = broad, s = singlet, d = doublet, t = triplet, q = quartet, m = multiplet, comp = composite. Enantioselectivity was determined on HPLC using Chiralpak IA-3 and IB-3 column. High-resolution mass spectra (HRMS) were recorded on a commercial apparatus (ESI Source) and (CI Source).

**Supplementary Table 1. Condition optimization studies**

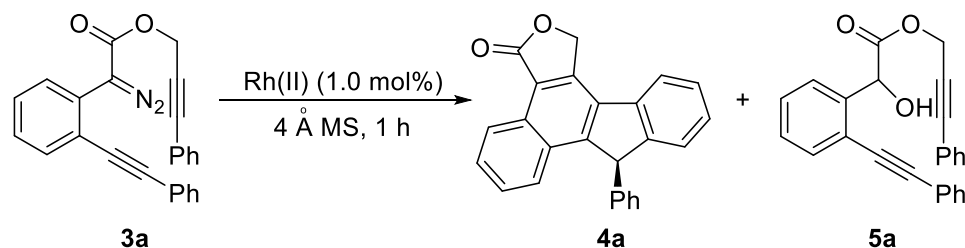

| Entry <sup>a</sup> | Cat.                                    | Solvent                                       | T (°C) | Yield (%) <sup>b</sup> | ee (%) <sup>c</sup> |
|--------------------|-----------------------------------------|-----------------------------------------------|--------|------------------------|---------------------|
| 1                  | Cu(hfacac) <sub>2</sub>                 | DCM                                           | rt     | 78                     | -                   |
| 2                  | Rh <sub>2</sub> (OAc) <sub>4</sub>      | DCM                                           | rt     | 35(42) <sup>d</sup>    | -                   |
| 3                  | Rh <sub>2</sub> (OAc) <sub>4</sub>      | DCM                                           | 40     | 82                     | -                   |
| 4                  | Rh <sub>2</sub> (S-PTTL) <sub>4</sub>   | DCM                                           | rt     | 78                     | 30                  |
| 5                  | Rh <sub>2</sub> (S-PTTL) <sub>4</sub>   | DCM                                           | -20    | 66                     | 39                  |
| 6                  | Rh <sub>2</sub> (S-PTTL) <sub>4</sub>   | DCM                                           | 40     | 81                     | 59                  |
| 7                  | Rh <sub>2</sub> (S-PTTL) <sub>4</sub>   | DCE                                           | 40     | 83                     | 55                  |
| 8                  | Rh <sub>2</sub> (S-PTTL) <sub>4</sub>   | toluene                                       | 40     | 70                     | 75                  |
| 9                  | Rh <sub>2</sub> (S-PTTL) <sub>4</sub>   | CF <sub>3</sub> C <sub>6</sub> H <sub>5</sub> | 40     | 78                     | 64                  |
| 10                 | Rh <sub>2</sub> (S-PTTL) <sub>4</sub>   | TBME                                          | 40     | 77                     | 80                  |
| 11                 | Rh <sub>2</sub> (S-PTTL) <sub>4</sub>   | DMB                                           | 40     | 81                     | 75                  |
| 12                 | Rh <sub>2</sub> (S-PTPA) <sub>4</sub>   | TBME                                          | 40     | 76                     | 36                  |
| 13                 | Rh <sub>2</sub> (S-PTA) <sub>4</sub>    | TBME                                          | 40     | 82                     | 8                   |
| 14                 | Rh <sub>2</sub> (S-NTTL) <sub>4</sub>   | TBME                                          | 40     | 83                     | 73                  |
| 15                 | Rh <sub>2</sub> (S-TCPTTL) <sub>4</sub> | TBME                                          | 40     | 81                     | 58                  |
| 16                 | Rh <sub>2</sub> (S-TFPTTL) <sub>4</sub> | TBME                                          | 40     | 90                     | 92                  |
| 17 <sup>e</sup>    | Rh <sub>2</sub> (S-TFPTTL) <sub>4</sub> | TBME                                          | 40     | 85                     | 91                  |
| 18 <sup>f</sup>    | Rh <sub>2</sub> (S-TFPTTL) <sub>4</sub> | TBME                                          | 40     | 78                     | 70                  |
| 19                 | Rh <sub>2</sub> (S-TBPTL) <sub>4</sub>  | TBME                                          | 40     | 85                     | 40                  |
| 20                 | Rh <sub>2</sub> (S-DOSP) <sub>4</sub>   | TBME                                          | 40     | 87                     | 52                  |
| 21                 | Rh <sub>2</sub> (S-PTAD) <sub>4</sub>   | TBME                                          | 40     | 91                     | 85                  |

<sup>a</sup>The reaction was carried out on 0.2 mmol scale. The dirhodium catalyst was added as a solution in 1.0 mL of the same solvent *via* syringe pump in 40 min under inert atmosphere, and the reaction mixture was stirred for additional 20 min before purification *via* column chromatography.

<sup>b</sup>Isolated yields of **4a**.

<sup>c</sup>Determined by chiral HPLC analysis.

<sup>d</sup>In the absence of 4 Å MS and data in parentheses is yield of **5a**.

<sup>e</sup>The **3a** in TBME (1.0 mL) was added to a solution of Rh<sub>2</sub>(S-TFPTTL)<sub>4</sub> (1.0 mol%) in 40 min.

<sup>f</sup>The **3a** in TBME (1.0 mL) was added to a solution of Rh<sub>2</sub>(S-TFPTTL)<sub>4</sub> (5.0 mol%) in 40 min.

DCM = dichloromethane. TBME = *tert*-butyl methyl ether. DMB = 2,2-dimethyl butane.

## General Procedure for the Preparation of Diazo Compounds 1

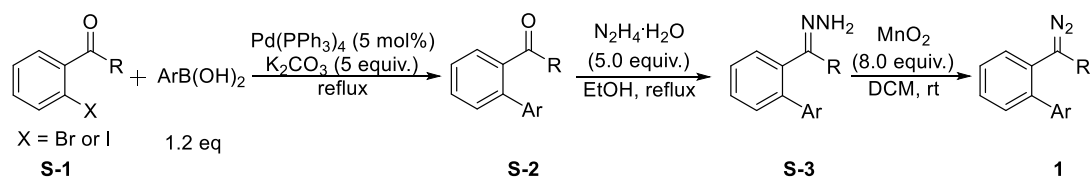

**Synthesis of S-2<sup>1</sup>:** To a 50-mL oven-dried flask containing a magnetic stirring bar **S-1<sup>2</sup>** (5.0 mmol), aryl boronic acid (6.0 mmol), K<sub>2</sub>CO<sub>3</sub> (3.4 g, 25 mmol), and Pd(PPh<sub>3</sub>)<sub>4</sub> (238 mg, 5.0 mol%), in toluene/EtOH/H<sub>2</sub>O (16 mL/2 mL/2 mL) was stirred under N<sub>2</sub> protected refluxing for 5 hours. Then the reaction mixture was quenched by adding brine (15 mL) and extracted with ethyl acetate (15 mL X 3). The combined organic layers were dried over Na<sub>2</sub>SO<sub>4</sub>, and solvent was evaporated in *vacuo* after filtration, and the residue was purified by column chromatography on silica gel (Hexanes:EtOAc = 50:1) to provide the corresponding coupling products **S-2** (> 90% yield).

**Synthesis of S-3<sup>3</sup>:** To a 50-mL oven-dried flask containing a magnetic stirring bar and compound **S-2** (4.0 mmol) in ethanol (10 ml), was added N<sub>2</sub>H<sub>4</sub>·H<sub>2</sub>O (1.0 g, 20 mmol). The solution was stirred under refluxing. After consumption of the material (monitored by TLC, EtOAc:PE = 30:1), the solvent was evaporated under reduced pressure and the resulting crude product extracted with ethyl acetate (3×15 mL). The combined organic layers were dried over Na<sub>2</sub>SO<sub>4</sub>, and solvent was evaporated in *vacuo* after filtration to give the crude products **S-3**, which were directly used for the next step without purification.

**Synthesis of I<sup>2</sup>:** To a 50-mL oven-dried flask containing a magnetic stirring bar and the above obtained **S-3** in dry DCM (20.0 ml), was added MnO<sub>2</sub> (2.7 g, 8.0 eq) slowly. After consumption of the material (monitored by TLC, EtOAc:PE = 5:1), the reaction mixture was filtered through Celite and rinsed with DCM (20 mL). The combined organic layers were dried over Na<sub>2</sub>SO<sub>4</sub>, and solvent was evaporated in *vacuo* after filtration. The residue was purified by pretreated column chromatography on silica gel (Hexanes with 1.0 % Et<sub>3</sub>N) to provide the corresponding pure diazo compounds **1** as red solid (> 80% yield).

## Characterization of Diazo Compounds 1.

### 2-[Diazo(phenyl)methyl]-4'-fluoro-1,1'-biphenyl (1a)

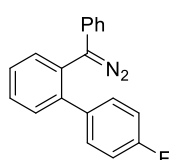

Red solid, <sup>1</sup>H NMR (400 MHz, CDCl<sub>3</sub>) (δ, ppm) δ 7.61 – 7.54 (m, 1H), 7.45 (comp, 3H), 7.39 – 7.28 (comp, 4H), 7.16 – 6.99 (comp, 5H); <sup>13</sup>C NMR (100 MHz, CDCl<sub>3</sub>) (δ, ppm) δ 162.2 (d, J = 246.5 Hz), 141.0, 136.5, 131.6, 131.2

(d,  $J = 6.4$  Hz), 130.0 (d,  $J = 8.1$  Hz), 129.1, 128.6, 128.2, 126.6, 124.4, 122.8), 115.9, 115.6. HRMS (TOF MS  $\text{CI}^+$ ) calculated for  $\text{C}_{19}\text{H}_{14}\text{FN}_2$  [ $\text{M} + \text{H}$ ] $^+$ , 289.1141; found, 289.1149.

#### 4'-Chloro-2-[diazo(phenyl)methyl]-1,1'-biphenyl (1b)

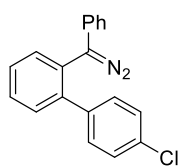

Red solid,  $^1\text{H}$  NMR (400 MHz,  $\text{CDCl}_3$ ) ( $\delta$ , ppm)  $\delta$  7.59 (m, 1H), 7.50 – 7.44 (comp, 3H), 7.33 (comp, 6H), 7.12 (t,  $J = 7.4$  Hz, 1H), 7.09 – 7.04 (m, 2H);  $^{13}\text{C}$  NMR (100 MHz,  $\text{CDCl}_3$ )  $\delta$  140.7, 138.9, 133.4, 131.5, 131.2, 131.1, 129.6, 129.1, 129.0, 128.6, 128.4, 126.5, 124.4, 122.8. HRMS (TOF MS  $\text{CI}^+$ )

calculated for  $\text{C}_{19}\text{H}_{14}\text{ClN}_2$  [ $\text{M} + \text{H}$ ] $^+$ , 305.0846; found, 305.0837.

#### 4'-Bromo-2-[diazo(phenyl)methyl]-1,1'-biphenyl (1c)

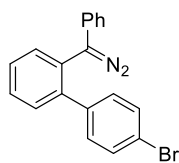

Red solid,  $^1\text{H}$  NMR (400 MHz,  $\text{CDCl}_3$ ) ( $\delta$ , ppm)  $\delta$  7.58 (m, 1H), 7.47 (comp 5H), 7.34 (t,  $J = 7.8$  Hz, 2H), 7.24 (d,  $J = 8.4$  Hz, 2H), 7.11 (t,  $J = 7.4$  Hz, 1H), 7.04 (d,  $J = 7.6$  Hz, 2H);  $^{13}\text{C}$  NMR (100 MHz,  $\text{CDCl}_3$ ) ( $\delta$ , ppm)  $\delta$  140.8, 139.4, 132.0, 131.5, 131.3, 131.1, 130.0, 129.2, 128.6, 128.4, 126.5, 124.5, 122.8,

121.6. HRMS (TOF MS  $\text{CI}^+$ ) calculated for  $\text{C}_{19}\text{H}_{14}\text{BrN}_2$  [ $\text{M} + \text{H}$ ] $^+$ , 349.0340; found, 349.0346.

#### 2-[Diazo(phenyl)methyl]-4'-(trifluoromethyl)-1,1'-biphenyl (1d)

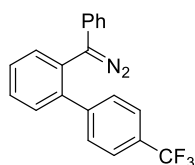

Red solid,  $^1\text{H}$  NMR (400 MHz,  $\text{CDCl}_3$ ) ( $\delta$ , ppm)  $\delta$  7.66 – 7.58 (comp, 3H), 7.55 – 7.44 (comp, 5H), 7.33 (m, 2H), 7.11 (t,  $J = 7.4$  Hz, 1H), 7.08 – 7.02 (m, 2H);  $^{13}\text{C}$  NMR (100 MHz,  $\text{CDCl}_3$ ) ( $\delta$ , ppm)  $\delta$  144.2, 140.5, 131.3, 131.3, 131.2, 129.2, 129.1, 129.0(q,  $J = 200.4$  Hz), 128.8, 128.7, 128.4, 126.7,

125.8(q,  $J = 14.8$  Hz), 124.6, 122.9. HRMS (TOF MS  $\text{CI}^+$ ) calculated for  $\text{C}_{20}\text{H}_{14}\text{F}_3\text{N}_2$  [ $\text{M} + \text{H}$ ] $^+$ , 339.1109; found, 339.1117.

#### 2-[Diazo(phenyl)methyl]-4'-methyl-1,1'-biphenyl (1e)

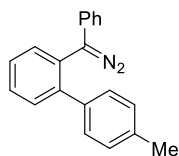

Red solid,  $^1\text{H}$  NMR (400 MHz,  $\text{CDCl}_3$ ) ( $\delta$ , ppm)  $\delta$  7.68 – 7.60 (m, 1H), 7.59 – 7.46 (comp, 3H), 7.45 – 7.32 (comp, 4H), 7.30 – 7.23 (m, 2H), 7.21 – 7.10 (comp, 3H), 2.46 (s, 3H);  $^{13}\text{C}$  NMR (100 MHz,  $\text{CDCl}_3$ ) ( $\delta$ , ppm)  $\delta$  142.0, 137.6, 136.9, 131.9, 131.3, 131.1, 129.5, 129.0, 128.4, 128.1, 127.8, 126.4, 124.2,

122.8, 21.3. HRMS (TOF MS  $\text{CI}^+$ ) calculated for  $\text{C}_{20}\text{H}_{17}\text{N}_2$  [ $\text{M} + \text{H}$ ] $^+$ , 258.1392; found, 258.1385.

### 2-(Diazo(phenyl)methyl)-4'-methoxy-1,1'-biphenyl (1f)

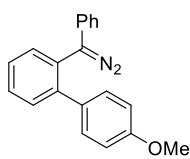

Red solid,  $^1\text{H NMR}$  (400 MHz,  $\text{CDCl}_3$ ) ( $\delta$ , ppm)  $\delta$  7.60 (m, 1H), 7.45 (comp, 3H), 7.34 (comp, 4H), 7.10 (comp, 3H), 6.99 – 6.87 (m, 2H), 3.83 (s, 3H);  $^{13}\text{C NMR}$  (100 MHz,  $\text{CDCl}_3$ )  $\delta$  158.9, 141.7, 132.7, 131.9, 131.2, 131.1, 129.4, 129.0, 128.4, 127.6, 126.3, 124.2, 122.8, 114.2, 55.3. HRMS (TOF MS  $\text{CI}^+$ ) calculated for  $\text{C}_{20}\text{H}_{17}\text{ON}_2$  [ $\text{M} + \text{H}$ ] $^+$ , 301.1341; found, 301.1341.

### 1-{2-[Diazo(phenyl)methyl]phenyl}naphthalene (1g)

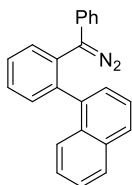

Pink solid,  $^1\text{H NMR}$  (400 MHz,  $\text{CDCl}_3$ ) ( $\delta$ , ppm)  $\delta$  7.90 (m, 2H), 7.69 (t,  $J = 9.4$  Hz, 2H), 7.61 – 7.45 (comp, 5H), 7.43 – 7.35 (m, 2H), 7.28 (m, 2H), 7.11 – 7.01 (m, 3H);  $^{13}\text{C NMR}$  (100 MHz,  $\text{CDCl}_3$ ) ( $\delta$ , ppm)  $\delta$  140.1, 138.0, 133.8, 132.5, 131.4, 131.3, 130.1, 128.8, 128.5, 128.4, 128.2, 128.0, 127.8, 126.9, 126.1, 125.9, 125.7, 125.6, 124.3, 123.2. HRMS (TOF MS  $\text{CI}^+$ ) calculated for  $\text{C}_{23}\text{H}_{17}\text{N}_2$  [ $\text{M} + \text{H}$ ] $^+$ , 321.1392; found, 321.1386.

### 2-[Diazo(phenyl)methyl]-2'-fluoro-1,1'-biphenyl (1h)

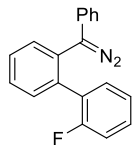

Red solid,  $^1\text{H NMR}$  (400 MHz,  $\text{CDCl}_3$ ) ( $\delta$ , ppm)  $\delta$  7.61 – 7.55 (m, 1H), 7.51 – 7.44 (comp, 3H), 7.28 (comp, 4H), 7.18 – 7.13 (m, 1H), 7.11 – 7.02 (comp, 4H);  $^{13}\text{C NMR}$  (101 MHz,  $\text{CDCl}_3$ ) ( $\delta$ , ppm)  $\delta$  159.5 (d,  $J = 247.1$  Hz), 131.9 (d,  $J = 1.1$  Hz), 131.3, 131.0 (d,  $J = 3.2$  Hz), 130.5, 129.5, 129.4, 128.9, 128.7, 128.2, 128.0, 124.5 (d,  $J = 3.6$  Hz), 124.4, 123.2, 116.1, 115.9. HRMS (TOF MS  $\text{CI}^+$ ) calculated for  $\text{C}_{19}\text{H}_{14}\text{FN}_2$  [ $\text{M} + \text{H}$ ] $^+$ , 289.1141; found, 289.1143.

### 2-[Diazo(phenyl)methyl]-3'-fluoro-1,1'-biphenyl (1i)

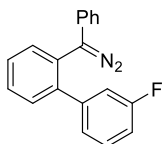

Red solid,  $^1\text{H NMR}$  (400 MHz,  $\text{CDCl}_3$ ) ( $\delta$ , ppm)  $\delta$  7.59 (m, 1H), 7.51 – 7.44 (comp, 3H), 7.39 – 7.30 (comp, 3H), 7.17 (d,  $J = 7.7$  Hz, 1H), 7.10 (comp, 4H), 7.02 (m, 1H);  $^{13}\text{C NMR}$  (100 MHz,  $\text{CDCl}_3$ ) ( $\delta$ , ppm)  $\delta$  163.1 (d,  $J = 246.0$  Hz), 142.7 (d,  $J = 7.7$  Hz), 140.5, 131.4, 131.2, 131.0, 130.3, 130.2, 129.1, 128.5 (d,  $J = 2.3$  Hz), 126.6, 124.5, 124.1 (d,  $J = 2.8$  Hz), 123.0, 115.3 (d,  $J = 21.9$  Hz), 114.2 (d,  $J = 21.1$  Hz). HRMS (TOF MS  $\text{CI}^+$ ) calculated for  $\text{C}_{19}\text{H}_{14}\text{FN}_2$  [ $\text{M} + \text{H}$ ] $^+$ , 289.1141; found, 289.1137.

### 2-[(4-Chlorophenyl)(diazo)methyl]-4'-fluoro-1,1'-biphenyl (**1j**)

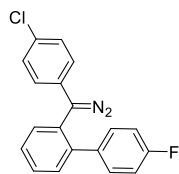

Red solid,  $^1\text{H NMR}$  (400 MHz,  $\text{CDCl}_3$ ) ( $\delta$ , ppm)  $\delta$  7.51 (m, 1H), 7.47 – 7.39 (comp, 3H), 7.33 – 7.20 (comp, 4H), 7.03 (comp, 2H), 6.91 (d,  $J = 8.6$  Hz, 2H);  $^{13}\text{C NMR}$  (100 MHz,  $\text{CDCl}_3$ ) ( $\delta$ , ppm)  $\delta$  162.3 (d,  $J = 247.2$  Hz), 131.3, 131.1, 130.3, 129.9 (d,  $J = 8.1$  Hz), 129.8, 129.3, 128.9, 128.4, 126.1, 124.4, 123.8, 115.8 (d,  $J = 21.5$  Hz). HRMS (TOF MS  $\text{CI}^+$ ) calculated for  $\text{C}_{19}\text{H}_{13}\text{ClFN}_2$  [ $\text{M} + \text{H}$ ] $^+$ , 323.0751; found, 323.0743.

### 2-[(Diazo(*p*-tolyl)methyl)-4'-fluoro-1,1'-biphenyl (**1k**)

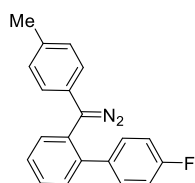

Red solid,  $^1\text{H NMR}$  (400 MHz,  $\text{CDCl}_3$ ) ( $\delta$ , ppm)  $\delta$  7.57 – 7.51 (m, 1H), 7.42 (comp, 3H), 7.35 – 7.29 (m, 2H), 7.15 (d,  $J = 8.3$  Hz, 2H), 7.05 (m, 2H), 6.95 (d,  $J = 8.2$  Hz, 2H), 2.35 (s, 3H);  $^{13}\text{C NMR}$  (100 MHz,  $\text{CDCl}_3$ ) ( $\delta$ , ppm)  $\delta$  162.2 (d,  $J = 246.3$  Hz), 140.8, 136.5 (d,  $J = 3.3$  Hz), 134.2, 131.2, 131.0, 130.0, 129.93, 129.92, 128.3 (d,  $J = 23.4$  Hz), 128.2, 126.89, 115.8 (d,  $J = 21.5$  Hz), 21.0 (s). HRMS (TOF MS  $\text{CI}^+$ ) calculated for  $\text{C}_{20}\text{H}_{16}\text{FN}_2$  [ $\text{M} + \text{H}$ ] $^+$ , 303.1298; found, 303.1289.

### General Procedure for the Preparation of Diazoacetates **3**.

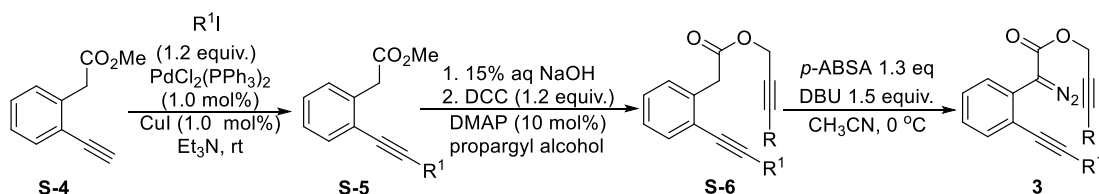

**Synthesis of S-5<sup>5</sup>:** To a 50-mL oven-dried flask containing a magnetic stirring bar, **S-4<sup>4</sup>** (3.0 mmol, 523 mg),<sup>2</sup>  $\text{PdCl}_2(\text{PPh}_3)_2$  (1.0 mol%, 21 mg),  $\text{CuI}$  (1.0 mol%, 6 mg),  $\text{Et}_3\text{N}$  (10 mL) and aryl iodide (3.6 mmol) were added in sequence. The mixture was stirred at room temperature overnight. Then ether (10 mL) and  $\text{H}_2\text{O}$  (10 mL) were added to quench the reaction, and the aqueous layer was extracted with ether (10 mL). The combined organic layers were dried over  $\text{Na}_2\text{SO}_4$ . The solvent was evaporated in *vacuo* after filtration. The residue was purified by column chromatography on silica gel (Hexanes:EtOAc = 20:1) to give the corresponding coupling products **S-5** as pale yellow oil (> 80% yield).

**Synthesis of S-6<sup>6</sup>:** To a 50-mL oven-dried flask containing a magnetic stirring bar and compound **S-5** (2.0 mmol) in THF (5.0 ml), was added 15% NaOH (10 ml). The solution was stirred at room temperature for 5 h. After consumption of the material (monitored by TLC), the mixture was

acidified with 1N HCl solution (to PH~3.0), The mixture was extracted with DCM (10 mL X 2) and the combined organic extracts was dried over Na<sub>2</sub>SO<sub>4</sub>, and solvent was evaporated in *vacuo* after filtration to give a pale yellow solid, this solid was directly used for the next step without purification.

To a 50-mL oven-dried flask containing a magnetic stirring bar, the above obtained acid, propargyl alcohol (2.4 mmol), and DMAP (4-dimethylaminopyridine, 24.4 mg, 0.2 mmol) in DCM (10 mL), was added DCC (dicyclohexylcarbodiimide, 0.63 g, 2.4 mmol) in batches at 0 ° C, and the reaction mixture was stirred at room temperature overnight. After that, the reaction mixture was filtered through Celite and rinsed with EtOAc (10 mL), and the filtrates were combined. After evaporating the solvents, the residue was purified by column chromatography on silica gel (Hexanes:EtOAc = 20:1) to provide the corresponding esters **S-6** as white solid (> 90% yield).

**Synthesis of 3:** To a 50-mL oven-dried flask containing a magnetic stirring bar, esters **S-6** (1.5 mmol) and *p*-ABSA (4-Acetamidobenzenesulfonyl azide, 468 mg, 1.95 mmol, 1.3 eq) in CH<sub>3</sub>CN (10 mL) was added DBU (1,8-diazabicyclo[5.4.0]undec-7-ene, 342 mg, 2.25 mmol, 1.5 eq) in CH<sub>3</sub>CN (2.0 mL) slowly at 0 °C, and the resulting reaction mixture was stirred at room temperature for 5 h. The reaction mixture was diluted with ether (10 mL), and washed with saturated aqueous NH<sub>4</sub>Cl (20 mL), NaHCO<sub>3</sub> (20 mL) and NaCl (20 mL) in sequence, and the separated organic phase was dried with anhydrous Na<sub>2</sub>SO<sub>4</sub>. The solvent was evaporated in *vacuo* after filtration, and the residue was purified by column chromatography on silica gel (Hexanes:EtOAc:Et<sub>3</sub>N= 20:1:0.2) to provide diazo compounds **3** as orange oil or solid depend on the substrate (> 90% yield).

### Characterization of Diazoacetates 3.

#### 3-Phenylprop-2-yn-1-yl 2-diazo-2-[2-(phenylethynyl)phenyl]acetate (3a)

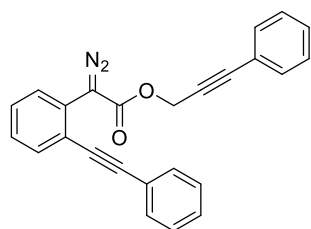

Orange oil, <sup>1</sup>H NMR (400 MHz, CDCl<sub>3</sub>) (δ, ppm) δ 7.70 (d, *J* = 7.5 Hz, 1H), 7.64 – 7.58 (comp, 3H), 7.52 – 7.47 (m, 2H), 7.45 – 7.40 (m, 1H), 7.39 – 7.29 (comp, 7H), 5.13 (s, 2H); <sup>13</sup>C NMR (100 MHz, CDCl<sub>3</sub>) (δ, ppm) δ 165.1, 133.1, 132.0, 131.7, 130.0, 128.89, 128.85, 128.8, 128.5, 128.4, 127.7, 126.4, 122.83, 122.2, 121.3, 96.8, 86.8, 86.6, 83.1, 53.4. HRMS (TOF MS CI<sup>+</sup>) calculated for C<sub>25</sub>H<sub>17</sub>N<sub>2</sub>O<sub>2</sub> [M + H]<sup>+</sup>, 377.1290; found, 377.1298.



### 3-(4-Chlorophenyl)prop-2-ynyl 2-diazo-2-[2-(phenylethynyl)phenyl]acetate (3b)

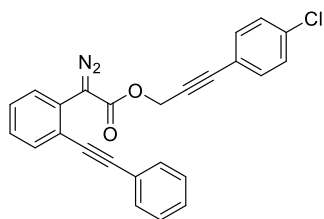

Orange oil,  $^1\text{H}$  NMR (400 MHz,  $\text{CDCl}_3$ ) ( $\delta$ , ppm)  $\delta$  7.69 – 7.63 (m, 1H), 7.62 – 7.53 (comp, 3H), 7.49 – 7.31 (comp, 7H), 7.31 – 7.23 (comp, 3H), 5.08 (s, 2H);  $^{13}\text{C}$  NMR (100 MHz,  $\text{CDCl}_3$ ) ( $\delta$ , ppm)  $\delta$  164.1, 134.1, 134.0, 133.1, 131.7, 130.0, 128.8, 128.5, 127.7, 126.4, 122.8, 121.3, 118.3, 115.8, 115.6, 96.8, 86.6, 85.7, 82.9, 53.3.

HRMS (TOF MS  $\text{Cl}^+$ ) calculated for  $\text{C}_{25}\text{H}_{16}\text{ClN}_2\text{O}_2$  [ $\text{M} + \text{H}$ ] $^+$ , 411.0900; found, 411.0906.

### 3-(4-Bromophenyl)prop-2-ynyl 2-diazo-2-[2-(phenylethynyl)phenyl]acetate (3c)

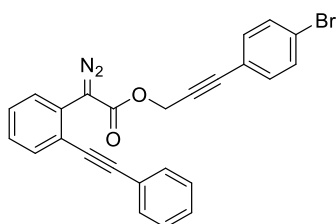

Orange oil,  $^1\text{H}$  NMR (400 MHz,  $\text{CDCl}_3$ ) ( $\delta$ , ppm)  $\delta$  7.64 (d,  $J$  = 7.8 Hz, 1H), 7.59 – 7.52 (comp, 3H), 7.42 – 7.34 (comp, 3H), 7.34 – 7.23 (comp, 6H), 5.05 (s, 2H);  $^{13}\text{C}$  NMR (100 MHz,  $\text{CDCl}_3$ ) ( $\delta$ , ppm)  $\delta$  165.0, 133.4, 133.0, 131.7, 131.6, 129.9, 128.8, 128.5, 127.7, 126.3, 123.2, 122.7, 121.3, 121.1, 96.8, 86.6,

85.6, 84.3, 53.2. HRMS (TOF MS  $\text{Cl}^+$ ) calculated for  $\text{C}_{25}\text{H}_{16}\text{BrN}_2\text{O}_2$  [ $\text{M} + \text{H}$ ] $^+$ , 455.0395; found, 455.0391.

### 3-[4-(Trifluoromethyl)phenyl]prop-2-ynyl 2-diazo-2-[2-(phenylethynyl)phenyl]acetate (3d)

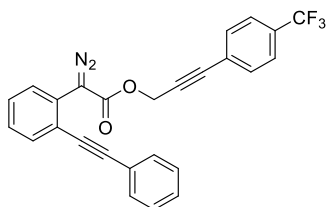

Orange solid,  $^1\text{H}$  NMR (400 MHz,  $\text{CDCl}_3$ ) ( $\delta$ , ppm)  $\delta$  7.65 (d,  $J$  = 8.0 Hz, 1H), 7.60 – 7.50 (comp, 7H), 7.43 – 7.22 (comp, 5H), 5.09 (s, 2H);  $^{13}\text{C}$  NMR (100 MHz,  $\text{CDCl}_3$ ) ( $\delta$ , ppm)  $\delta$  165.1, 133.1, 132.3, 131.7, 130.6 (m), 130.0, 128.9, 128.5, 128.0(m), 127.8, 126.3, 126.1 (m), 125.3 (m), 122.8, 122.6, 121.4, 96.8, 86.6, 85.6, 85.3,

53.1. HRMS (TOF MS  $\text{Cl}^+$ ) calculated for  $\text{C}_{26}\text{H}_{16}\text{F}_3\text{N}_2\text{O}_2$  [ $\text{M} + \text{H}$ ] $^+$ , 455.1164; found, 455.1159.

### 3-(4-Methoxyphenyl)prop-2-ynyl 2-diazo-2-[2-(phenylethynyl)phenyl]acetate (3e)

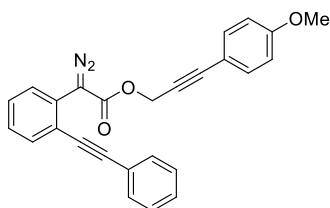

Orange oil,  $^1\text{H}$  NMR (400 MHz,  $\text{CDCl}_3$ ) ( $\delta$ , ppm)  $\delta$  7.66 (d,  $J$  = 8.0 Hz, 1H), 7.63 – 7.53 (comp, 3H), 7.43 – 7.32 (comp, 6H), 7.31 – 7.23 (m, 1H), 6.89 – 6.76 (m, 2H), 5.08 (s, 2H), 3.78 (s, 3H);  $^{13}\text{C}$  NMR (100 MHz,  $\text{CDCl}_3$ ) ( $\delta$ , ppm)  $\delta$  160.1, 133.6, 133.1, 131.8, 130.0, 128.8, 128.8, 128.5, 127.7, 126.5, 122.9, 121.3,

114.33, 114.0, 96.8, 86.8, 86.6, 81.8, 55.4, 53.6. HRMS (TOF MS  $\text{Cl}^+$ ) calculated for  $\text{C}_{26}\text{H}_{19}\text{N}_2\text{O}_3$  [ $\text{M} + \text{H}$ ] $^+$ , 407.1396; found, 407.1390.

### 3-*p*-Tolylprop-2-ynyl 2-diazo-2-[2-(phenylethynyl)phenyl]acetate (3f)

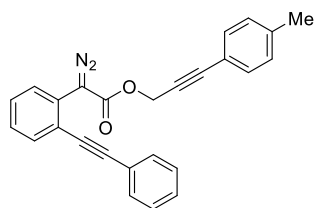

Orange oil,  $^1\text{H NMR}$  (400 MHz,  $\text{CDCl}_3$ ) ( $\delta$ , ppm)  $\delta$  7.73 – 7.67 (m, 1H)  $\delta$  7.64 – 7.57 (comp, 3H), 7.45 – 7.35 (comp, 7H), 7.34 – 7.28 (m, 1H), 7.13 (d,  $J = 7.9$  Hz, 2H), 5.12 (s, 2H), 2.36 (s, 3H);  $^{13}\text{C NMR}$  (100 MHz,  $\text{CDCl}_3$ ) ( $\delta$ , ppm)  $\delta$  165.2, 139.1, 133.1, 132.0, 131.7, 130.0, 129.2, 128.8, 128.8, 128.5, 127.7, 126.5, 122.9, 121.3, 119.1, 96.8, 87.0, 86.6, 82.4, 53.5, 21.6. HRMS (TOF MS  $\text{CI}^+$ ) calculated for  $\text{C}_{26}\text{H}_{19}\text{N}_2\text{O}_2$  [ $\text{M} + \text{H}$ ] $^+$ , 391.1447; found, 391.1441.

### 3-*m*-Tolylprop-2-ynyl 2-diazo-2-[2-(phenylethynyl)phenyl]acetate (3g)

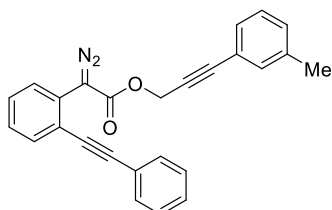

Orange solid,  $^1\text{H NMR}$  (400 MHz,  $\text{CDCl}_3$ ) ( $\delta$ , ppm)  $\delta$  7.66 (d,  $J = 7.9$  Hz, 1H), 7.61 – 7.52 (comp, 3H), 7.40 – 7.34 (m, 1H), 7.34 – 7.29 (comp, 3H), 7.29 – 7.22 (comp, 3H), 7.16 (t,  $J = 7.7$  Hz, 1H), 7.10 (d,  $J = 7.6$  Hz, 1H), 5.08 (s, 2H), 2.27 (s, 3H);  $^{13}\text{C NMR}$  (100 MHz,  $\text{CDCl}_3$ ) ( $\delta$ , ppm)  $\delta$  165.0, 138.0, 133.0, 132.5, 131.6, 129.9, 129.7, 129.0, 128.8, 128.7, 128.4, 128.2, 127.6, 126.3, 122.7, 121.9, 121.2, 96.8, 86.9, 86.6, 82.7, 53.3, 21.1. HRMS (TOF MS  $\text{CI}^+$ ) calculated for  $\text{C}_{26}\text{H}_{19}\text{N}_2\text{O}_2$  [ $\text{M} + \text{H}$ ] $^+$ , 391.1447; found, 391.1443.

### 3-*o*-Tolylprop-2-ynyl 2-diazo-2-[2-(phenylethynyl)phenyl]acetate (3h)

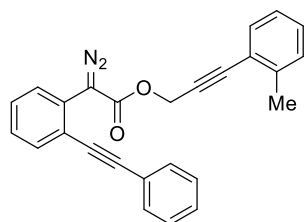

Orange oil,  $^1\text{H NMR}$  (400 MHz,  $\text{CDCl}_3$ ) ( $\delta$ , ppm)  $\delta$  7.70 (d,  $J = 7.9$  Hz, 1H), 7.65 – 7.54 (comp, 3H), 7.49 – 7.44 (m, 1H), 7.44 – 7.39 (m, 1H), 7.39 – 7.34 (m, 3H), 7.34 – 7.27 (m, 2H), 6.95 – 6.83 (m, 2H), 5.18 (s, 2H), 3.86 (s, 3H);  $^{13}\text{C NMR}$  (100 MHz,  $\text{CDCl}_3$ ) ( $\delta$ , ppm)  $\delta$  165.02, 140.65, 132.98, 132.23, 131.65, 129.96, 129.48, 128.81, 128.77, 128.76, 128.44, 127.65, 126.38, 125.55, 122.76, 121.93, 121.26, 96.75, 86.89, 86.57, 85.73, 53.49, 20.63. HRMS (TOF MS  $\text{CI}^+$ ) calculated for  $\text{C}_{26}\text{H}_{19}\text{N}_2\text{O}_2$  [ $\text{M} + \text{H}$ ] $^+$ , 391.1447; found, 391.1451.

### 3-(Naphthalen-1-yl)prop-2-ynyl 2-diazo-2-[2-(phenylethynyl)phenyl]acetate (3i)

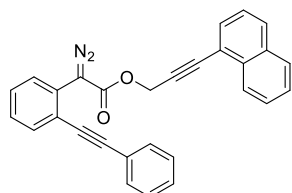

Orange oil,  $^1\text{H NMR}$  (400 MHz,  $\text{CDCl}_3$ ) ( $\delta$ , ppm)  $\delta$  8.33 (d,  $J = 8.4$  Hz, 1H), 7.86 – 7.77 (m, 2H), 7.69 (d,  $J = 7.3$  Hz, 2H), 7.63 – 7.53 (comp, 4H), 7.52 – 7.46 (m, 1H), 7.43 – 7.36 (m, 2H), 7.34 – 7.26 (comp, 3H), 5.24 (s, 2H);  $^{13}\text{C NMR}$  (100 MHz,  $\text{CDCl}_3$ ) ( $\delta$ , ppm)  $\delta$  165.2, 133.5,

133.2, 133.1, 131.7, 131.1, 130.1, 129.4, 128.9, 128.8, 128.5, 128.4, 127.8, 127.1, 126.6, 126.4, 126.1, 125.2, 122.8, 121.4, 119.8, 96.8, 88.0, 86.6, 85.0, 53.6. HRMS (TOF MS CI<sup>+</sup>) calculated for C<sub>29</sub>H<sub>19</sub>N<sub>2</sub>O<sub>2</sub> [M + H]<sup>+</sup>, 427.1447; found, 427.1451.

**Pent-2-yn-1-yl 2-diazo-2-[2-(phenylethynyl)phenyl]acetate (3j)**

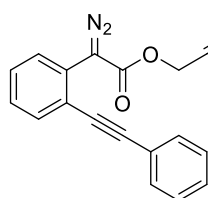

Orange oil, <sup>1</sup>H NMR (400 MHz, CDCl<sub>3</sub>) (δ, ppm) δ 7.69 – 7.64 (m, 1H), 7.62 – 7.55 (comp, 3H), 7.40 – 7.34 (comp, 4H), 7.32 – 7.26 (m, 1H), 4.87 (t, *J* = 2.2 Hz, 2H), 2.32 – 2.19 (m, 2H), 1.16 (t, *J* = 4.8 Hz, 3H); <sup>13</sup>C NMR (100 MHz, CDCl<sub>3</sub>) (δ, ppm) δ 165.1, 133.4, 133.0, 131.7, 129.9, 128.7, 128.4, 127.5, 126.4, 122.8, 121.2, 96.7, 89.2, 89.2, 86.6, 73.4, 53.4, 12.5. HRMS (TOF MS CI<sup>+</sup>) calculated for C<sub>21</sub>H<sub>17</sub>N<sub>2</sub>O<sub>2</sub> [M + H]<sup>+</sup>, 329.1290; found, 329.1296.

**3-(4-Chlorophenyl)prop-2-yn-1-yl 2-diazo-2-[2-((4-fluorophenyl)ethynyl)phenyl]acetate (3k)**

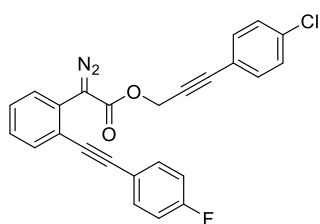

Orange oil, <sup>1</sup>H NMR (400 MHz, CDCl<sub>3</sub>) (δ, ppm) δ 7.72 – 7.65 (m, 1H), 7.62 – 7.56 (comp, 3H), 7.49 – 7.42 (m, 2H), 7.40 – 7.35 (comp, 3H), 7.33 – 7.28 (m, 1H), 7.05 – 6.97 (m, 2H), 5.10 (s, 2H); <sup>13</sup>C NMR (100 MHz, CDCl<sub>3</sub>) (δ, ppm) δ 164.1, 161.1, 134.1, 134.0, 133.1, 131.7, 130.0, 128.8 (d, *J* = 1.2 Hz), 128.5, 127.7, 126.4, 122.8, 121.3, 118.3 (d, *J* = 3.5 Hz), 115.7 (d, *J* = 22.1 Hz), 96.8, 86.6, 85.7, 82.9, 53.3. HRMS (TOF MS CI<sup>+</sup>) calculated for C<sub>25</sub>H<sub>15</sub>ClF<sub>2</sub>N<sub>2</sub>O<sub>2</sub> [M + H]<sup>+</sup>, 429.0806; found, 428.0801.

**3-(4-Chlorophenyl)prop-2-yn-1-yl 2-[2-[(4-chlorophenyl)ethynyl]phenyl]-2-diazoacetate (3l)**

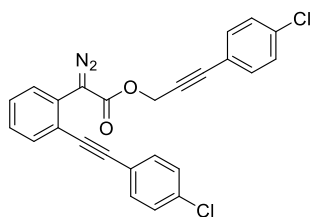

Yellow solid, <sup>1</sup>H NMR (400 MHz, CDCl<sub>3</sub>) (δ, ppm) δ 7.67 (d, *J* = 7.9 Hz, 1H), 7.60 – 7.55 (m, 1H), 7.53 – 7.47 (m, 2H), 7.46 – 7.36 (comp, 3H), 7.35 – 7.27 (comp, 5H), 5.09 (s, 2H); <sup>13</sup>C NMR (100 MHz, CDCl<sub>3</sub>) (δ, ppm) δ 165.0, 135.0, 134.9, 133.3, 133.1, 132.9, 130.0, 129.1, 128.9, 128.8, 127.8, 126.4, 121.3, 121.1, 120.7, 95.6, 87.5, 85.7, 84.1, 77.5, 77.2, 76.8, 53.3. HRMS (TOF MS CI<sup>+</sup>) calculated for C<sub>25</sub>H<sub>15</sub>Cl<sub>2</sub>N<sub>2</sub>O<sub>2</sub> [M + H]<sup>+</sup>, 445.0511; found, 444.0508.

**Methyl -4-[[2-(2-((3-(4-chlorophenyl)prop-2-yn-1-yl)oxy)-1-diazo-2-oxoethyl)phenyl]ethynyl]benzoate (3m)**

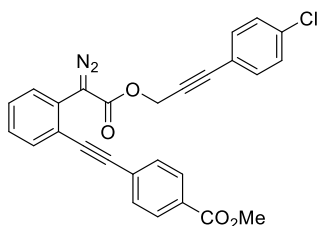

Yellow solid,  $^1\text{H NMR}$  (400 MHz,  $\text{CDCl}_3$ ) ( $\delta$ , ppm)  $\delta$  8.04 – 7.97 (m, 2H), 7.70 – 7.56 (comp, 4H), 7.47 – 7.40 (m, 1H), 7.40 – 7.35 (m, 2H), 7.35 – 7.26 (comp, 3H), 5.09 (s, 2H), 3.93 (s, 3H);  $^{13}\text{C NMR}$  (100 MHz,  $\text{CDCl}_3$ ) ( $\delta$ , ppm)  $\delta$  171.7, 166.7, 135.1, 133.3, 131.6, 130.10, 130.04, 129.7, 129.6, 129.4, 128.8, 127.9, 127.5, 126.7, 120.9, 120.7, 95.8, 89.4, 85.7, 84.1, 77.5, 77.2, 76.8, 53.4, 52.4. HRMS (TOF MS  $\text{Cl}^+$ ) calculated for  $\text{C}_{27}\text{H}_{17}\text{ClN}_2\text{O}_4$  [ $\text{M} + \text{H}$ ] $^+$ , 469.0955; found, 469.0964.

**3-(4-Chlorophenyl)prop-2-yn-1-yl 2-diazo-2-[2-[(4-methoxyphenyl)ethynyl]phenyl]acetate (3n)**

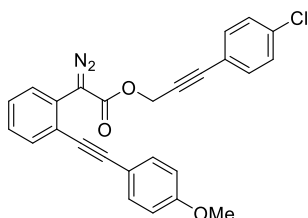

Orange oil,  $^1\text{H NMR}$  (400 MHz,  $\text{CDCl}_3$ ) ( $\delta$ , ppm)  $\delta$  7.65 (d,  $J = 7.9$  Hz, 1H), 7.60 – 7.55 (m, 1H), 7.54 – 7.48 (m, 2H), 7.42 – 7.36 (comp, 3H), 7.33 – 7.26 (comp, 3H), 6.93 – 6.84 (m, 2H), 5.09 (s, 2H), 3.82 (s, 3H);  $^{13}\text{C NMR}$  (100 MHz,  $\text{CDCl}_3$ ) ( $\delta$ , ppm)  $\delta$  165.2, 160.1, 135.0, 133.3, 133.2, 132.9, 123.0, 128.8, 128.5, 127.8, 126.1, 121.8, 120.7, 114.9, 114.2, 97.0, 85.6, 85.5, 84.2, 55.4, 53.2. HRMS (TOF MS  $\text{Cl}^+$ ) calculated for  $\text{C}_{26}\text{H}_{18}\text{ClN}_2\text{O}_3$  [ $\text{M} + \text{H}$ ] $^+$ , 411.1006; found, 411.1610.

**3-(4-chlorophenyl)prop-2-yn-1-yl 2-diazo-2-[2-(*p*-tolylethynyl)phenyl]acetate (3o)**

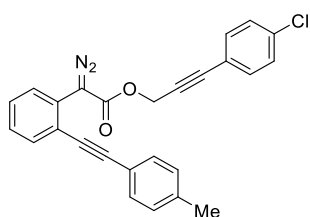

Orange oil,  $^1\text{H NMR}$  (400 MHz,  $\text{CDCl}_3$ ) ( $\delta$ , ppm)  $\delta$  7.66 (d,  $J = 8.0$  Hz, 1H), 7.58 (d,  $J = 7.7$  Hz, 1H), 7.48 (d,  $J = 7.9$  Hz, 2H), 7.44 – 7.36 (comp, 3H), 7.34 – 7.27 (comp, 3H), 7.17 (d,  $J = 8.0$  Hz, 2H), 5.09 (s, 2H), 2.38 (s, 3H);  $^{13}\text{C NMR}$  (100 MHz,  $\text{CDCl}_3$ ) ( $\delta$ , ppm)  $\delta$  165.2, 139.1, 1345.0, 133.3, 133.02, 131.7, 130.0, 129.3, 128.8, 128.7, 127.8, 126.3, 121.6, 120.8, 119.8, 97.1, 86.0, 85.6, 84.2, 53.2, 21.7. HRMS (TOF MS  $\text{Cl}^+$ ) calculated for  $\text{C}_{26}\text{H}_{18}\text{ClN}_2\text{O}_2$  [ $\text{M} + \text{H}$ ] $^+$ , 425.1057; found, 425.1063.

**3-(4-Chlorophenyl)prop-2-yn-1-yl 2-diazo-2-[2-(*m*-tolylethynyl)phenyl]acetate (3p)**

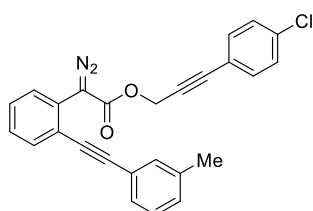

Orange oil,  $^1\text{H NMR}$  (400 MHz,  $\text{CDCl}_3$ ) ( $\delta$ , ppm)  $\delta$  7.69 (d,  $J = 8.0$  Hz, 1H), 7.64 – 7.59 (m, 1H), 7.47 – 7.39 (comp, 5H), 7.36 – 7.27 (comp, 4H), 7.20 (d,  $J = 7.4$  Hz, 1H), 5.12 (s, 2H), 2.39 (s, 3H);  $^{13}\text{C NMR}$  (100 MHz,  $\text{CDCl}_3$ ) ( $\delta$ , ppm)  $\delta$  165.2, 138.3, 135.0, 133.3,

133.1, 132.3, 130.0, 129.8, 128.9, 128.81, 128.78, 128.5, 127.8, 126.3, 122.7, 121.5, 120.6, 97.1, 86.3, 85.6, 84.2, 53.3, 21.4. HRMS (TOF MS  $\text{Cl}^+$ ) calculated for  $\text{C}_{26}\text{H}_{18}\text{ClN}_2\text{O}_2$   $[\text{M} + \text{H}]^+$ , 425.1057; found, 425.1059.

### 3-(4-Chlorophenyl)prop-2-yn-1-yl 2-diazo-2-[2-(*o*-tolylethynyl)phenyl]acetate (3q)

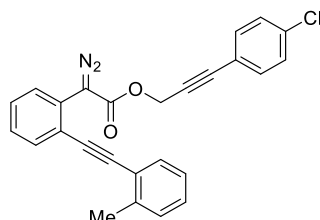

Orange oil,  $^1\text{H}$  NMR (400 MHz,  $\text{CDCl}_3$ ) ( $\delta$ , ppm)  $\delta$  7.68 – 7.60 (m, 2H), 7.49 – 7.42 (comp, 3H), 7.37 – 7.28 (comp, 6H), 7.27 – 7.22 (m, 1H), 5.15 (s, 2H), 2.57 (s, 3H);  $^{13}\text{C}$  NMR (100 MHz,  $\text{CDCl}_3$ ) ( $\delta$ , ppm)  $\delta$  165.1, 140.2, 135.0, 133.3, 133.2, 133.1, 132.2, 130.2, 129.7, 128.9, 128.80, 128.76, 127.9, 126.2, 125.8, 122.6, 120.7, 95.57, 9.40, 85.6, 84.2, 53.2, 20.8. HRMS (TOF MS  $\text{Cl}^+$ ) calculated for  $\text{C}_{26}\text{H}_{18}\text{ClN}_2\text{O}_2$   $[\text{M} + \text{H}]^+$ , 425.1057; found, 425.1053.

### 3-Phenylprop-2-yn-1-yl 2-{2-[(4-bromophenyl)ethynyl]phenyl}-2-diazoacetate (3r)

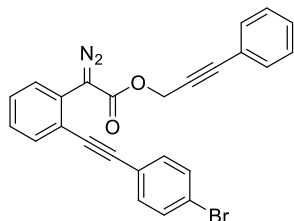

Orange oil,  $^1\text{H}$  NMR (400 MHz,  $\text{CDCl}_3$ ) ( $\delta$ , ppm)  $\delta$  7.66 – 7.62 (m, 1H), 7.59 – 7.55 (m, 1H), 7.53 – 7.46 (comp, 4H), 7.43 – 7.38 (m, 2H), 7.37 – 7.28 (comp, 5H), 7.25 – 7.19 (m, 1H), 5.10 (s, 2H);  $^{13}\text{C}$  NMR (100 MHz,  $\text{CDCl}_3$ ) ( $\delta$ , ppm)  $\delta$  164.4, 133.0, 132.6, 131.5, 131.3, 129.8, 129.5, 128.6, 128.4, 128.4, 127.9, 127.4, 127.3, 125.0, 121.7, 95.1, 87.2, 86.3, 82.5, 53.0. HRMS (TOF MS  $\text{Cl}^+$ ) calculated for  $\text{C}_{25}\text{H}_{16}\text{BrN}_2\text{O}_2$   $[\text{M} + \text{H}]^+$ , 455.0395; found, 455.0389.

### 3-(4-Chlorophenyl)prop-2-yn-1-yl 2-diazo-2-[2-(3,3-dimethylbut-1-yn-1-yl)phenyl]acetate(3s)

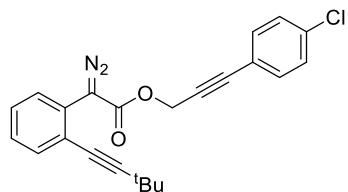

Orange oil,  $^1\text{H}$  NMR (400 MHz,  $\text{CDCl}_3$ ) ( $\delta$ , ppm)  $\delta$  7.57 (d,  $J$  = 7.9 Hz, 1H), 7.47 – 7.37 (comp, 3H), 7.36 – 7.27 (comp, 3H), 7.26 – 7.19 (m, 1H), 5.07 (s, 2H), 1.34 (s, 9H);  $^{13}\text{C}$  NMR (100 MHz,  $\text{CDCl}_3$ ) ( $\delta$ , ppm)  $\delta$  164.7, 134.4, 132.7, 132.7, 132.5, 129.4, 128.3, 128.2, 127.5, 127.1, 125.4, 121.7, 120.2, 105.7, 84.9, 83.7, 76.1, 52.6, 30.5. HRMS (TOF MS  $\text{Cl}^+$ ) calculated for  $\text{C}_{23}\text{H}_{20}\text{ClN}_2\text{O}_2$   $[\text{M} + \text{H}]^+$ , 391.1213; found, 391.1218.

### 3-(4-Chlorophenyl)prop-2-yn-1-yl 2-diazo-2-{2-[(triisopropylsilyl)ethynyl]phenyl}acetate (3t)

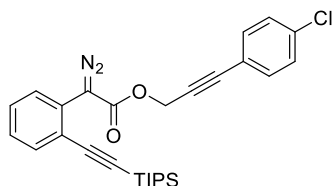

Yellow oil.  $^1\text{H}$  NMR (400 MHz,  $\text{CDCl}_3$ ) ( $\delta$ , ppm)  $\delta$  7.60 (t,  $J$  = 7.6 Hz, 1H), 7.55 (d,  $J$  = 7.7 Hz, 1H), 7.37 (comp, 3H), 7.32 – 7.24 (comp, 3H), 5.08 (s, 2H), 1.99 – 1.68 (m, 3H), 1.14 (d,  $J$  = 4.2 Hz,

18H);  $^{13}\text{C}$  NMR (101 MHz,  $\text{CDCl}_3$ ) ( $\delta$ , ppm)  $\delta$  165.0, 135.0, 133.7, 133.2, 130.4, 128.9, 128.8, 127.8, 126.8, 122.2, 120.8, 103.8, 98.7, 85.5, 84.2, 53.1, 18.7, 11.4. HRMS (TOF MS  $\text{CI}^+$ ) calculated for  $\text{C}_{28}\text{H}_{32}\text{ClN}_2\text{O}_2\text{Si}$  [ $\text{M} + \text{H}$ ] $^+$ , 491.1922; found, 491.1924.

### 3-Phenylprop-2-yn-1-yl 2-diazo-2-(2-ethynylphenyl)acetate (3u)

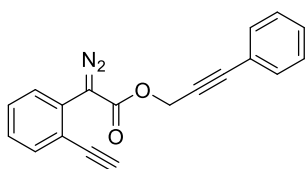

Orange oil,  $^1\text{H}$  NMR (400 MHz,  $\text{CDCl}_3$ ) ( $\delta$ , ppm)  $\delta$  7.72 (d,  $J = 8.1$  Hz, 1H), 7.61 (d,  $J = 7.0$  Hz, 1H), 7.58 – 7.52 (comp, 3H), 7.42 – 7.36 (comp, 4H), 5.17 (s, 2H), 3.58 (s, 1H);  $^{13}\text{C}$  NMR (100 MHz,  $\text{CDCl}_3$ ) ( $\delta$ , ppm)  $\delta$  164.4, 133.1, 131.5, 129.7, 128.8, 128.4, 127.9, 127.2, 126.78, 121.7, 86.3, 84.2, 82.6, 80.3, 52.6, 29.3. HRMS (TOF MS  $\text{CI}^+$ ) calculated for  $\text{C}_{19}\text{H}_{13}\text{N}_2\text{O}_2$  [ $\text{M} + \text{H}$ ] $^+$ , 301.0997; found, 301.0998.

## General Procedure for the Asymmetric C-H Functionalization

**Scheme 2:** To a 10-mL oven-dried vial containing a magnetic stirring bar, diazo compound **1** (0.2 mmol), and 4Å MS (100 mg) in TBME (1.0 mL),  $\text{Rh}_2(\text{S-TFPTTL})_4$  (3.0 mg, 1.0 mol%) was slowly added as a solution in TBME (1.0 mL) *via* a syringe pump over 40 min under argon atmosphere at room temperature. After addition, the reaction mixture was stirred for additional 1-5 hours as indicated, and then purified by column chromatography on silica gel without any additional treatment (Hexanes: DCM = 20:1 to 10:1) to give the desired fluorene products **2**.

**Scheme 3:** To a 10-mL oven-dried vial containing a magnetic stirring bar, diazo compound **3** (0.2 mmol), and 4Å MS (100 mg) in TBME (1.0 mL),  $\text{Rh}_2(\text{S-TFPTTL})_4$  (3.0 mg, 1.0 mol%) was added as a solution in TBME (1.0 mL) *via* a syringe pump over 40 min under argon atmosphere at 40 °C. After addition, the reaction mixture was stirred for additional 20 min, and then purified by column chromatography on silica gel without any additional treatment (Hexanes: DCM = 2:1 to 1:1) to give the desired polycyclic products **4**.

## Characterization of Asymmetric C-H Functionalization Products **2** and **4**.

### (*S*)-2-Fluoro-9-phenyl-9H-fluorene (2a)

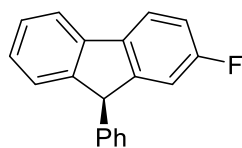

White solid, 46.8 mg, 90% yield, 99% *ee*, mp: 130.9-132.1 °C.  $^1\text{H}$  NMR (400 MHz,  $\text{CDCl}_3$ ) ( $\delta$ , ppm)  $\delta$  7.86 – 7.73 (m, 2H), 7.50 – 7.39 (m, 1H), 7.38 – 7.27 (comp, 5H), 7.19 – 7.08 (comp, 3H), 7.07 – 7.01 (m, 1H), 5.06 (s, 1H);  $^{13}\text{C}$  NMR (100 MHz,  $\text{CDCl}_3$ ) ( $\delta$ , ppm)  $\delta$  162.8 (d,  $J = 245.5$  Hz), 150.2 (d,  $J = 8.2$  Hz), 147.9, 141.05 (s), 140.3, 137.1, 129.0, 128.4, 127.6, 127.4 (d,  $J = 39.2$  Hz),

127.1, 125.5, 121.0 (d,  $J = 8.8$  Hz), 119.7, 114.7 (d,  $J = 23.1$  Hz), 112.9 (d,  $J = 23.0$  Hz), 54.6 (d,  $J = 2.3$  Hz). HRMS (TOF MS  $\text{CI}^+$ ) calculated for  $\text{C}_{19}\text{H}_{14}\text{F}$  [ $\text{M} + \text{H}$ ] $^+$ , 261.1080; found, 261.1076. HPLC conditions for determination of enantiomeric excess: Chiral IB-3,  $\lambda = 272$  nm, Condition: hexane/2-propanol/ethanol = 99.2:0.4:0.4, flow rate = 1.0 mL/min,  $t_{\text{major}} = 4.3$  min,  $t_{\text{minor}} = 4.9$  min.

#### (S)-2-Chloro-9-phenyl-9H-fluorene (2b)

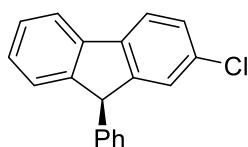

White solid, 50.2 mg, 91% yield, 98% *ee*, mp: 142.9-143.5 °C.  $^1\text{H}$  NMR (400 MHz,  $\text{CDCl}_3$ ) ( $\delta$ , ppm)  $\delta$  7.79 (d,  $J = 7.6$  Hz, 1H), 7.73 (d,  $J = 8.1$  Hz, 1H), 7.40 (comp, 2H), 7.35 – 7.27 (comp, 6H), 7.13 – 7.07 (comp, 2H), 5.04 (s, 1H);  $^{13}\text{C}$  NMR (100 MHz,  $\text{CDCl}_3$ ) ( $\delta$ , ppm)  $\delta$  149.7, 147.8, 140.8, 140.1, 139.7, 133.1, 129.0, 128.4, 127.8, 127.7, 127.6, 127.2, 125.8, 125.5, 120.9, 120.0, 54.5. HRMS (TOF MS  $\text{CI}^+$ ) calculated for  $\text{C}_{19}\text{H}_{14}\text{Cl}$  [ $\text{M} + \text{H}$ ] $^+$ , 277.0784; found, 277.0783. HPLC conditions for determination of enantiomeric excess: Chiral IB-3,  $\lambda = 272$  nm, Condition: hexane/2-propanol/ethanol = 99.2:0.4:0.4, flow rate = 1.0 mL/min,  $t_{\text{major}} = 4.6$  min,  $t_{\text{minor}} = 4.9$  min.

#### (S)-2-Bromo-9-phenyl-9H-fluorene (2c)

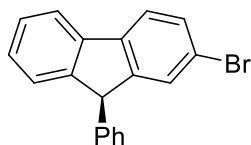

White solid, 58.9 mg, 92% yield, 95% *ee*, mp: 167.5-168.4 °C.  $^1\text{H}$  NMR (400 MHz,  $\text{CDCl}_3$ ) ( $\delta$ , ppm)  $\delta$  7.78 (d,  $J = 7.6$  Hz, 1H), 7.66 (d,  $J = 8.1$  Hz, 1H), 7.51 (comp, 1H), 7.44 (s, 1H), 7.42 – 7.37 (m, 1H), 7.29 (comp, 5H), 7.12 – 7.05 (m, 2H), 5.03 (s, 1H);  $^{13}\text{C}$  NMR (100 MHz,  $\text{CDCl}_3$ ) ( $\delta$ , ppm)  $\delta$  150.0, 147.7, 140.8, 140.1, 132.1, 130.6, 129.0, 128.7, 128.4, 127.9, 127.7, 127.3, 125.5, 121.3, 121.2, 120.1, 54.48. HRMS (TOF MS  $\text{CI}^+$ ) calculated for  $\text{C}_{19}\text{H}_{14}\text{Br}$  [ $\text{M} + \text{H}$ ] $^+$ , 321.0279; found, 321.0286. HPLC conditions for determination of enantiomeric excess: Chiral IB-3,  $\lambda = 272$  nm, Condition: hexane/2-propanol/ethanol = 99.2:0.4:0.4, flow rate = 1.0 mL/min,  $t_{\text{major}} = 6.0$  min,  $t_{\text{minor}} = 7.0$  min.

#### (S)-9-Phenyl-2-(trifluoromethyl)-9H-fluorene (2d)

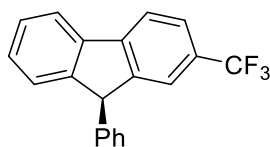

White solid, 58.9 mg, 95% yield, 96% *ee*, mp: 111.2-112.8 °C.  $^1\text{H}$  NMR (400 MHz,  $\text{CDCl}_3$ ) ( $\delta$ , ppm)  $\delta$  7.88 (t,  $J = 8.5$  Hz, 2H), 7.68 (d,  $J = 8.0$  Hz, 1H), 7.59 (s, 1H), 7.45 (m, 1H), 7.40 – 7.28 (comp, 5H), 7.11 (d,  $J = 7.1$  Hz, 2H), 5.10 (s, 1H);  $^{13}\text{C}$  NMR (100 MHz,  $\text{CDCl}_3$ ) ( $\delta$ , ppm)  $\delta$  148.7, 148.3, 144.6, 140.5, 139.7, 129.3 (q,  $J = 128.0$  Hz) 129.1, 128.7, 128.4, 127.8, 127.4, 125.7, 124.86 (q,  $J = 3.7$  Hz), 124.6 (q,  $J = 248.4$  Hz) 122.40 (q,  $J = 3.8$  Hz), 120.7, 120.1, 54.6. HRMS (TOF MS  $\text{CI}^+$ ) calculated for  $\text{C}_{20}\text{H}_{14}\text{F}_3$  [ $\text{M} + \text{H}$ ] $^+$ , 311.1048; found, 311.1041. HPLC conditions for determination of enantiomeric excess: Chiral IB-3,  $\lambda = 272$  nm, Condition:

hexane/2-propanol/ethanol = 99.2:0.4:0.4, flow rate= 1.0 mL/min,  $t_{\text{major}}$  = 4.5 min,  $t_{\text{minor}}$  = 5.0 min.

**(S)-2-Methyl-9-phenyl-9H-fluorene (2e)**

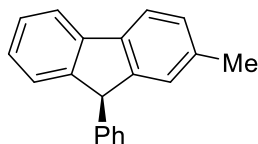

White solid, 49.2 mg, 96% yield, 93% *ee*, mp: 103.2-104.9 °C.  $^1\text{H}$  NMR (400 MHz,  $\text{CDCl}_3$ ) ( $\delta$ , ppm)  $\delta$  7.84 (d,  $J$  = 7.6 Hz, 1H), 7.77 (d,  $J$  = 7.7 Hz, 1H), 7.44 (t,  $J$  = 7.4 Hz, 1H), 7.40 – 7.24 (comp, 6H), 7.19 (comp, 3H), 5.08 (s, 1H), 2.43 (s, 3H);  $^{13}\text{C}$  NMR (100 MHz,  $\text{CDCl}_3$ ) ( $\delta$ , ppm)  $\delta$  148.3, 147.9, 141.9, 141.2, 138.5, 137.3, 128.8, 128.5, 128.3, 127.4, 126.9, 126.9, 126.1, 125.4, 119.7, 119.7, 54.4, 21.7. HRMS (TOF MS  $\text{CI}^+$ ) calculated for  $\text{C}_{20}\text{H}_{17}$  [ $\text{M} + \text{H}$ ] $^+$ , 257.1330; found, 257.1324. HPLC conditions for determination of enantiomeric excess: Chiral IB-3,  $\lambda$  = 272 nm, Condition: hexane/2-propanol/ethanol = 99.2:0.4:0.4, flow rate= 1.0 mL/min,  $t_{\text{major}}$  = 4.4 min,  $t_{\text{minor}}$  = 4.1 min.

**(S)-2-Methoxy-9-phenyl-9H-fluorene (2f)**

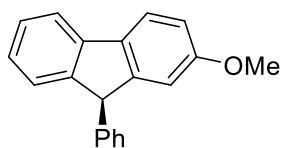

White solid, 50.6 mg, 93% yield, 90% *ee*, mp: 169.2-170.6 °C.  $^1\text{H}$  NMR (400 MHz,  $\text{CDCl}_3$ ) ( $\delta$ , ppm)  $\delta$  8.00 (d,  $J$  = 7.8 Hz, 1H), 7.44 (t,  $J$  = 7.5 Hz, 1H), 7.38 (d,  $J$  = 7.5 Hz, 1H), 7.34 – 7.25 (comp, 4H), 7.19 – 7.23 (comp, 3H), 7.13 (comp, 2H), 5.06 (s, 1H), 2.81 (s, 3H);  $^{13}\text{C}$  NMR (100 MHz,  $\text{CDCl}_3$ ) ( $\delta$ , ppm)  $\delta$  148.5, 148.5, 142.1, 142.1, 139.1, 133.1, 129.7, 128.8, 128.5, 127.3, 127.1, 126.9, 126.7, 125.4, 123.2, 123.0, 54.5, 21.1. HRMS (TOF MS  $\text{CI}^+$ ) calculated for  $\text{C}_{20}\text{H}_{17}\text{O}$  [ $\text{M} + \text{H}$ ] $^+$ , 273.1279; found, 273.1277. HPLC conditions for determination of enantiomeric excess: Chiral IB-3,  $\lambda$  = 272 nm, Condition: hexane/2-propanol/ethanol = 99.6:0.2:0.2, flow rate= 1.0 mL/min,  $t_{\text{major}}$  = 6.0 min,  $t_{\text{minor}}$  = 6.6 min.

**(S)-7-Phenyl-7H-benzo[*c*]fluorine (2g)**

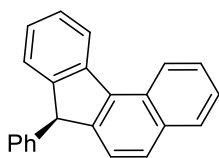

White solid, 55.5 mg, 95% yield, 92% *ee*, mp: 133.2-134.6 °C.  $^1\text{H}$  NMR (400 MHz,  $\text{CDCl}_3$ ) ( $\delta$ , ppm)  $\delta$  8.88 (d,  $J$  = 8.5 Hz, 1H), 8.47 (d,  $J$  = 7.8 Hz, 1H), 8.00 (d,  $J$  = 8.1 Hz, 1H), 7.82 (d,  $J$  = 8.3 Hz, 1H), 7.78 – 7.66 (m, 1H), 7.56 (comp, 3H), 7.46 (d,  $J$  = 7.4 Hz, 1H), 7.40 – 7.28 (comp, 4H), 7.16 (comp, 2H), 5.15 (s, 1H);  $^{13}\text{C}$  NMR (100 MHz,  $\text{CDCl}_3$ ) ( $\delta$ , ppm)  $\delta$  149.3, 146.9, 142.2, 141.2, 135.6, 133.8, 129.6, 129.4, 128.9, 128.6, 128.5, 127.6, 127.1, 126.8, 126.5, 125.42, 125.34, 124.1, 123.4, 123.0, 55.0. HRMS (TOF MS  $\text{CI}^+$ ) calculated for  $\text{C}_{23}\text{H}_{17}$  [ $\text{M} + \text{H}$ ] $^+$ , 293.1330; found, 293.1328. HPLC conditions for determination of enantiomeric excess: Chiral IB-3,  $\lambda$  = 272 nm, Condition: hexane/2-propanol/ethanol = 99.1:0.45:0.45, flow rate= 1.0 mL/min,  $t_{\text{major}}$  = 5.8 min,  $t_{\text{minor}}$  = 6.3



min.

**(S)-4-Fluoro-9-phenyl-9H-fluorene (2h)**

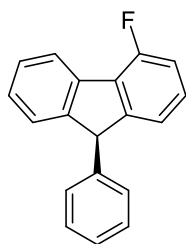

White solid, 49.4 mg, 95% yield, 91% *ee*, mp: 112.3-113.5 °C. <sup>1</sup>H NMR (400 MHz, CDCl<sub>3</sub>) (δ, ppm) δ 8.05 (d, *J* = 7.4 Hz, 1H), 7.45 (t, *J* = 7.2 Hz, 1H), 7.40 – 7.20 (comp, 6H), 7.11 (comp, 4H), 5.12 (s, 1H); <sup>13</sup>C NMR (100 MHz, CDCl<sub>3</sub>) (δ, ppm) δ 158.4 (d, *J* = 250.1 Hz), 150.8 (d, *J* = 5.1 Hz), 147.4, 141.2, 138.2, 128.9, 128.56 (d, *J* = 7.0 Hz), 128.4, 128.3, 127.8, 127.6, 127.2, 125.2, 123.6 (d, *J* = 5.6 Hz), 121.1 (d, *J* = 3.3 Hz), 114.4 (d, *J* = 19.7 Hz), 55.1. HRMS (TOF MS CI<sup>+</sup>) calculated for C<sub>19</sub>H<sub>14</sub>F [M + H]<sup>+</sup>, 261.1080; found, 261.1082. HPLC conditions for determination of enantiomeric excess: Chiral IB-3, λ = 272 nm, Condition: hexane/2-propanol/ethanol = 99.6:0.2:0.2, flow rate= 1.0 mL/min, *t*<sub>major</sub> = 6.9 min, *t*<sub>minor</sub> = 8.0 min.

**(S)-3-Fluoro-9-phenyl-9H-fluorene (2i)**

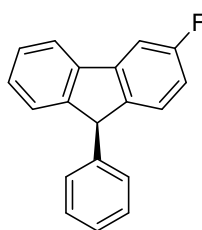

White solid, 49.4 mg, 95% yield, 94% *ee*, mp: 123.4-124.7 °C. <sup>1</sup>H NMR (400 MHz, CDCl<sub>3</sub>) (δ, ppm) δ 7.69 (d, *J* = 7.6 Hz, 1H), 7.40 (m, 1H), 7.33 (t, *J* = 7.1 Hz, 1H), 7.26 – 7.12 (comp, 6H), 7.02 (d, *J* = 6.8 Hz, 2H), 6.88 (m, 1H), 4.95 (s, 1H); <sup>13</sup>C NMR (100 MHz, CDCl<sub>3</sub>) (δ, ppm) δ 163.0 (d, *J* = 243.9 Hz), 148.9, 143.4 (d, *J* = 2.5 Hz), 143.1 (d, *J* = 8.9 Hz), 141.4, 140.3 (d, *J* = 3.2 Hz), 128.9, 128.4, 128.0, 127.6, 127.1, 126.5 (d, *J* = 9.1 Hz), 125.6, 120.3, 114.3 (d, *J* = 23.0 Hz), 107.0 (d, *J* = 23.0 Hz), 54.0. HRMS (TOF MS CI<sup>+</sup>) calculated for C<sub>19</sub>H<sub>14</sub>F [M + H]<sup>+</sup>, 261.1080; found, 261.1081. HPLC conditions for determination of enantiomeric excess: Chiral IB-3, λ = 272 nm, Condition: hexane/2-propanol = 100:0, flow rate= 1.0 mL/min, *t*<sub>major</sub> = 5.9 min, *t*<sub>minor</sub> = 7.1 min.

**(S)-9-(4-Chlorophenyl)-2-fluoro-9H-fluorene (2j)**

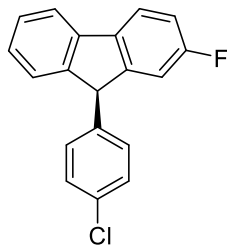

White solid, 54.7 mg, 93% yield, 95% *ee*, mp: 147.8-149.3 °C. <sup>1</sup>H NMR (400 MHz, CDCl<sub>3</sub>) (δ, ppm) δ 7.82 – 7.71 (m, 2H), 7.47 – 7.39 (m, 1H), 7.28 (m, 4H), 7.12 (m, 1H), 7.07 – 6.98 (m, 3H), 5.02 (s, 1H); <sup>13</sup>C NMR (100 MHz, CDCl<sub>3</sub>) (δ, ppm) δ 162.8 (d, *J* = 245.8 Hz), 149.7 (d, *J* = 8.1 Hz), 147.4, 140.3, 139.6, 137.1, 133.0, 129.7, 129.1, 127.8, 127.2, 125.4, 121.0 (d, *J* = 8.8 Hz), 119.8, 114.9 (d, *J* = 23.1 Hz), 112.7 (d, *J* = 23.1 Hz), 53.9 (d, *J* = 2.3 Hz). HRMS (TOF MS CI<sup>+</sup>) calculated for C<sub>19</sub>H<sub>13</sub>ClF [M + H]<sup>+</sup>, 295.0690; found, 295.0696. HPLC conditions for determination of enantiomeric excess: Chiral IB-3, λ = 272 nm, Condition:

hexane/2-propanol/ethanol = 99:0.5:0.5, flow rate= 1.0 mL/min,  $t_{\text{major}}$  = 5.8 min,  $t_{\text{minor}}$  = 6.7 min.

**(S)-2-Fluoro-9-(p-tolyl)-9H-fluorene (2k)**

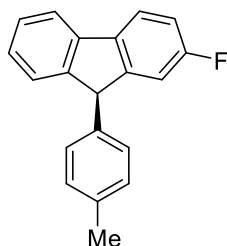

White solid, 49.9 mg, 91% yield, 92% *ee*, mp: 137.6-138.9 °C. <sup>1</sup>H NMR (400 MHz, CDCl<sub>3</sub>) (δ, ppm) δ 7.82 – 7.71 (m, 2H), 7.41 (t, *J* = 7.3 Hz, 1H), 7.34 (d, *J* = 7.4 Hz, 1H), 7.31 – 7.27 (m, 1H), 7.12 (comp, 3H), 7.07 – 6.96 (comp, 3H), 5.03 (s, 1H), 2.37 (s, 3H); <sup>13</sup>C NMR (100 MHz, CDCl<sub>3</sub>) (δ, ppm) δ 162.8 (d, *J* = 245.2 Hz), 150.4 (d, *J* = 8.2 Hz), 148.0, 140.3, 138.0, 137.1, 136.8, 129.7, 128.3, 127.5, 127.1, 125.4, 120.9 (d, *J* = 8.8 Hz), 119.7, 114.6 (d, *J* = 23.1 Hz), 112.7 (d, *J* = 23.0 Hz), 54.2 (d, *J* = 2.2 Hz), 21.2. HRMS (TOF MS CI<sup>+</sup>) calculated for C<sub>20</sub>H<sub>16</sub>F [M + H]<sup>+</sup>, 275.1236; found, 275.1230; HPLC conditions for determination of enantiomeric excess: Chiral IB-3, λ = 272 nm, Condition: hexane/2-propanol/ethanol = 99.2:0.4:0.4, flow rate= 1.0 mL/min,  $t_{\text{major}}$  = 6.0 min,  $t_{\text{minor}}$  = 7.4 min.

**(R)-8-Phenyl-1H-benzo[1,2]fluoreno[3,4-c]furan-3(8H)-one (4a)**

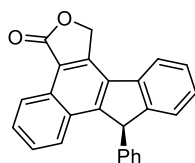

White solid, 62.7 mg, 90% yield, 92% *ee*, [α]<sub>D</sub><sup>20</sup> = 78.2° (c = 0.5, MeOH), mp: 267.2-268.5 °C. <sup>1</sup>H NMR (400 MHz, CDCl<sub>3</sub>) (δ, ppm) δ 9.14 (d, *J* = 8.4 Hz, 1H), 7.76 (d, *J* = 8.4 Hz, 1H), 7.71 – 7.64 (m, 1H), 7.56 (d, *J* = 7.5 Hz, 1H), 7.53 – 7.46 (m, 2H), 7.44 – 7.36 (m, 2H), 7.34 – 7.25 (comp, 3H), 7.11 – 6.94 (m, 2H), 5.69 (dd, *J* = 65.4, 15.9 Hz, 2H), 5.24 (s, 1H); <sup>13</sup>C NMR (100 MHz, CDCl<sub>3</sub>) (δ, ppm) δ 171.4, 150.2, 149.2, 142.7, 140.5, 138.6, 133.3, 130.3, 129.3, 129.2, 128.3, 128.05, 128.03, 127.9, 127.7, 127.4, 125.5, 125.3, 124.4, 121.2, 120.4, 68.6, 55.1. HRMS (TOF MS CI<sup>+</sup>) calculated for C<sub>25</sub>H<sub>17</sub>O<sub>2</sub> [M + H]<sup>+</sup>, 349.1223; found, 349.1233. HPLC conditions for determination of enantiomeric excess: Chiral IB-3, λ = 272 nm, hexane/2-propanol /ethanol= 97.5:1.25:1.25, flow rate= 1.0 mL/min,  $t_{\text{major}}$  = 35.3 min,  $t_{\text{minor}}$  = 38.2 min.

**(R)-10-Chloro-8-phenyl-1H-benzo[1,2]fluoreno[3,4-c]furan-3(8H)-one (4b)**

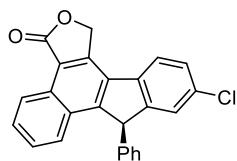

White solid, 67.2 mg, 88% yield, 93% *ee*, [α]<sub>D</sub><sup>20</sup> = 136.4° (c = 0.5, MeOH), mp: > 280 °C. <sup>1</sup>H NMR (400 MHz, CDCl<sub>3</sub>) (δ, ppm) δ 9.10 (d, *J* = 8.0 Hz, 1H), 7.70-7.62 (m, 2H), 7.54-7.51 (m, 2H), 7.49-7.44 (m, 2H), 7.35-7.34 (m, 2H), 7.24-7.22 (m, 2H), 6.99-6.96 (m, 2H), 5.77-5.71 (m, 1H), 5.64-5.57 (m, 1H), 5.25-5.23 (m, 1H); <sup>13</sup>C NMR (100 MHz, CDCl<sub>3</sub>) δ 171.2, 149.6, 148.7, 142.6, 139.0, 138.6, 133.33, 133.25, 130.1, 129.6, 129.4, 129.2, 128.4, 128.2, 127.8, 125.4, 125.10, 125.08, 124.5, 121.3, 120.6, 68.6, 54.3. HRMS (TOF MS CI<sup>+</sup>) calculated for C<sub>25</sub>H<sub>16</sub>ClO<sub>2</sub> [M +

H]<sup>+</sup>, 383.0839; found, 383.0828. HPLC conditions for determination of enantiomeric excess: Chiral IB-3,  $\lambda = 272$  nm, hexane/2-propanol /ethanol= 97.5:1.25:1.25, flow rate= 1.0 mL/min,  $t_{\text{major}} = 41.5$  min,  $t_{\text{minor}} = 44.0$  min.

**(R)-10-Bromo-8-phenyl-1H-benzo[1,2]fluoreno[3,4-c]furan-3(8H)-one (4c)**

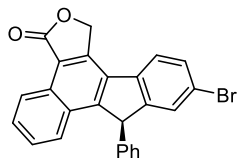

Yellow solid, 73.5 mg, 86% yield, 92% *ee*,  $[\alpha]_{\text{D}}^{20} = 86.8^{\circ}$  ( $c = 0.5$ , MeOH), mp:  $> 280$  °C. <sup>1</sup>H NMR (400 MHz, CDCl<sub>3</sub>) ( $\delta$ , ppm)  $\delta$  9.11 (d,  $J = 8.3$  Hz, 1H), 7.77 (d,  $J = 8.4$  Hz, 1H), 7.64 (t,  $J = 7.7$  Hz, 1H), 7.52 – 7.40 (comp, 3H), 7.37 (s, 1H), 7.34 – 7.26 (comp, 3H), 7.13 – 7.03 (m, 2H), 5.76 (dd,  $J = 26.8$  Hz, 15.9 Hz, 2H), 5.46 (s, 1H); <sup>13</sup>C NMR (100 MHz, CDCl<sub>3</sub>) ( $\delta$ , ppm)  $\delta$  171.2, 150.8, 150.2, 142.4, 139.7, 137.2, 134.1, 130.3, 129.6, 129.4, 128.5, 128.4, 128.1, 127.9, 127.8, 126.1, 125.3, 124.5, 122.05, 120.8, 68.5, 55.2. HRMS (TOF MS CI<sup>+</sup>) calculated for C<sub>25</sub>H<sub>16</sub>BrO<sub>2</sub> [M + H]<sup>+</sup>, 427.0334; found, 427.0338. HPLC conditions for determination of enantiomeric excess: Chiral IA-3,  $\lambda = 272$  nm, hexane/2-propanol = 92:8, flow rate= 1.0 mL/min,  $t_{\text{major}} = 18.4$  min,  $t_{\text{minor}} = 20.1$  min.

**(R)-8-Phenyl-10-(trifluoromethyl)-1H-benzo[1,2]fluoreno[3,4-c]furan-3(8H)-one (4d)**

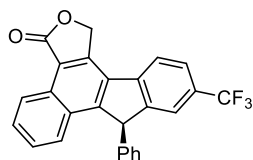

Yellow solid, 64.1mg, 77% yield, 99% *ee*,  $[\alpha]_{\text{D}}^{20} = 122.6^{\circ}$  ( $c = 0.5$ , MeOH), mp: 226.1-227.8 °C. <sup>1</sup>H NMR (400 MHz, CDCl<sub>3</sub>) ( $\delta$ , ppm)  $\delta$  9.11 (d, 1H,  $J = 8.3$  Hz), 7.80-7.78 (m, 1H), 7.73-7.71 (m, 1H), 7.68-7.61 (comp, 3H), 7.50-7.46 (m, 1H), 7.31-7.28 (comp, 3H), 7.08-7.07 (m, 2H), 5.80 (d, 1H,  $J = 15.9$  Hz), 5.71 (d, 1H,  $J = 15.9$  Hz), 5.45 (s, 1H); <sup>13</sup>C NMR (100 MHz, CDCl<sub>3</sub>) ( $\delta$ , ppm)  $\delta$  171.0, 151.4, 149.5, 142.7, 142.1, 139.3, 131.9, 130.2, 130.1, 129.8, 129.7, 129.6, 129.0, 128.0, 127.9, 125.6, 125.49, 125.45, 125.41, 125.37, 124.5, 122.9, 122.4 (q,  $J = 15.0$  Hz), 121.3, 120.9, 68.4, 55.2, 29.8. HRMS (TOF MS CI<sup>+</sup>) calculated for C<sub>26</sub>H<sub>16</sub>F<sub>3</sub>O<sub>2</sub> [M + H]<sup>+</sup>, 417.1102; found, 417.1109. HPLC conditions for determination of enantiomeric excess: Chiral IA-3,  $\lambda = 272$  nm, hexane/2-propanol = 95:5, flow rate= 1.0 mL/min,  $t_{\text{major}} = 22.9$  min.

**(R)-10-Methoxy-8-phenyl-1H-benzo[1,2]fluoreno[3,4-c]furan-3(8H)-one (4e)**

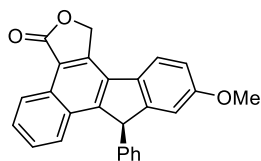

Yellow solid, 47.6 mg, 63% yield, 82% *ee*. mp: 248.2-249.4 °C. <sup>1</sup>H NMR (400 MHz, CDCl<sub>3</sub>) ( $\delta$ , ppm)  $\delta$  9.04 (d,  $J = 8.8$  Hz, 1H), 7.59-7.56 (comp, 2H), 7.42-7.38 (m, 1H), 7.33-7.31 (m, 1H), 7.25-7.18 (comp, 3H), 6.96-6.92 (comp, 3H), 6.84-6.83 (m, 1H), 5.60-5.56 (m, 1H), 5.37-5.32 (m, 1H), 4.87 (s, 1H), 3.82 (s, 3H); <sup>13</sup>C NMR (100 MHz, CDCl<sub>3</sub>) ( $\delta$ , ppm)  $\delta$  171.3,

160.2, 151.2, 149.0, 142.1, 140.5, 133.1, 131.3, 130.1, 129.3, 128.5, 127.9, 127.7, 127.5, 127.4, 124.9, 124.3, 121.8, 120.1, 113.59, 113.57, 111.37, 111.34, 68.4, 55.7, 54.9. HRMS (TOF MS CI<sup>+</sup>) calculated for C<sub>26</sub>H<sub>19</sub>O<sub>3</sub> [M + H]<sup>+</sup>, 379.1334; found, 379.1335. HPLC conditions for determination of enantiomeric excess: Chiral IA-3, λ = 272 nm, hexane/2-propanol = 96:04, flow rate= 1.0 mL/min, t<sub>major</sub> = 22.0 min, t<sub>minor</sub> = 26.6 min.

**(R)-10-methyl-8-phenyl-1H-benzo[1,2]fluoreno[3,4-c]furan-3(8H)-one (4f)**

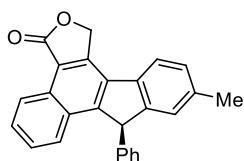

White solid, 63.7 mg, 88% yield, 96% ee, [α]<sub>D</sub><sup>20</sup> = 110.0° (c = 0.5, MeOH), mp: >280 °C. <sup>1</sup>H NMR (400 MHz, CDCl<sub>3</sub>) (δ, ppm) δ 9.19 (d, J = 8.4 Hz, 1H), 7.80 (d, J = 8.4 Hz, 1H), 7.72 (t, J = 8.0 Hz, 1H), 7.56-7.48 (m, 2H), 7.37-7.34 (comp, 4H), 7.13-7.11 (m, 2H), 5.81 (d, J = 15.6 Hz, 1H), 5.66 (d, J = 15.6 Hz, 1H), 5.26 (s, 1H), 2.50 (s, 3H); <sup>13</sup>C NMR (100 MHz, CDCl<sub>3</sub>) (δ, ppm) δ 171.4, 149.8, 149.4, 142.5, 140.7, 138.3, 133.4, 131.8, 130.3, 129.3, 129.0, 128.8, 128.1, 128.0, 127.6, 127.4, 126.2, 125.2, 124.4, 120.9, 120.3, 68.6, 54.9, 21.8. HRMS (TOF MS CI<sup>+</sup>) calculated for C<sub>26</sub>H<sub>19</sub>O<sub>2</sub> [M + H]<sup>+</sup>, 363.1385; found, 363.1380. HPLC conditions for determination of enantiomeric excess: Chiral IA-3, λ = 272 nm, hexane/2-propanol = 93:7, flow rate= 1.0 mL/min, t<sub>major</sub> = 29.7 min, t<sub>minor</sub> = 32.7 min.

**(R)-9-Methyl-8-phenyl-1H-benzo[1,2]fluoreno[3,4-c]furan-3(8H)-one (4g)**

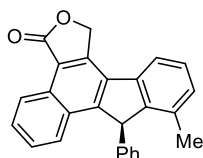

White solid, 38.4 mg, 53% yield, 97% ee, [α]<sub>D</sub><sup>20</sup> = 148.8° (c = 0.5, MeOH), mp: 248.8-250.1 °C. <sup>1</sup>H NMR (400 MHz, CDCl<sub>3</sub>) (δ, ppm) δ 9.07 (d, J = 8.4 Hz, 1H), 7.69 (d, J = 8.4 Hz, 1H), 7.63-7.59 (m, 1H), 7.45-7.41 (m, 1H), 7.28-7.20 (comp, 5H), 7.16-7.14 (m, 1H), 6.99-6.97 (m, 2H), 5.70 (d, J = 15.6 Hz, 1H), 5.56-5.50 (m, 1H), 5.12-5.10 (m, 1H), 2.49 (s, 3H); <sup>13</sup>C NMR (100 MHz, CDCl<sub>3</sub>) (δ, ppm) δ 171.2, 150.4, 146.3, 142.5, 140.6, 138.8, 137.7, 133.1, 130.1, 129.1, 128.9, 128.8, 128.0, 127.8, 127.4, 127.2, 125.1, 125.0, 124.2, 121.6, 120.1, 68.5, 54.5, 21.6. HRMS (TOF MS CI<sup>+</sup>) calculated for C<sub>26</sub>H<sub>19</sub>O<sub>2</sub> [M + H]<sup>+</sup>, 363.1385; found, 363.1392. HPLC conditions for determination of enantiomeric excess: Chiral IB-3, λ = 272 nm, hexane/2-propanol /ethanol= 98.5:0.75:0.75, flow rate= 1.0 mL/min, t<sub>major</sub> = 34.7 min, t<sub>minor</sub> = 37.9 min.

**(R)-12-Methyl-8-phenyl-1H-benzo[1,2]fluoreno[3,4-c]furan-3(8H)-one (4g')**

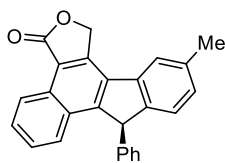

White solid, 23.9 mg, 33% yield, 60% *ee*, mp: 276.6-277.8 °C. <sup>1</sup>H NMR (400 MHz, CDCl<sub>3</sub>) (δ, ppm) δ 9.19 (d, *J* = 8.4 Hz, 1H), 7.79 (d, *J* = 8.4 Hz, 1H), 7.64-7.59 (m, 1H), 7.45-7.41 (m, 1H), 7.24-7.16 (comp, 6H), 7.03-7.01 (m, 2H), 5.91 (d, *J* = 15.6 Hz, 1H), 5.81 (d, *J* = 15.6 Hz, 1H), 5.29 (s, 1H), 2.84 (s, 3H); <sup>13</sup>C NMR (100 MHz, CDCl<sub>3</sub>) (δ, ppm) δ 171.6, 151.6, 150.2, 142.2, 141.6, 138.0, 134.3, 131.0, 130.9, 130.3, 129.3, 129.1, 128.5, 128.2, 127.9, 127.8, 127.3, 125.5, 124.2, 123.5, 121.3, 71.6, 54.6, 23.1. HRMS (TOF MS CI<sup>+</sup>) calculated for C<sub>26</sub>H<sub>19</sub>O<sub>2</sub> [M + H]<sup>+</sup>, 363.1385; found, 363.1391. HPLC conditions for determination of enantiomeric excess: Chiral IB-3, λ = 272 nm, hexane/2-propanol /ethanol= 97.5:1.25:1.25, flow rate= 1.0 mL/min, *t*<sub>major</sub> = 41.5 min, *t*<sub>minor</sub> = 43.8 min.

**(R)-11-Methyl-8-phenyl-1H-benzo[1,2]fluoreno[3,4-c]furan-3(8H)-one (4h)**

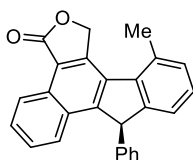

White solid, 27.5 mg, 38% yield, < 5% *ee*, mp: 274.3-275.6 °C. <sup>1</sup>H NMR (400 MHz, CDCl<sub>3</sub>) (δ, ppm) δ 9.05 (d, *J* = 8.4 Hz, 1H), 7.84 (d, *J* = 8.4 Hz, 1H), 7.62-7.58 (m, 1H), 7.48-7.44 (m, 1H), 7.41-7.38 (m, 1H), 7.34-7.32 (m, 1H), 7.20-7.21 (comp, 4H), 6.99-6.97 (m, 2H), 5.67 (d, *J* = 16.0 Hz, 1H), 5.47-5.42 (m, 1H), 5.07-5.04 (m, 1H), 2.11 (s, 3H); <sup>13</sup>C NMR (100 MHz, CDCl<sub>3</sub>) (δ, ppm) δ 171.3, 151.0, 147.4, 142.7, 139.1, 139.0, 135.6, 132.7, 130.0, 129.8, 129.1, 128.95, 128.93, 128.4, 128.1, 127.6, 127.1, 124.8, 124.4, 120.2, 118.8, 68.6, 54.8, 19.2. HRMS (TOF MS CI<sup>+</sup>) calculated for C<sub>26</sub>H<sub>19</sub>O<sub>2</sub> [M + H]<sup>+</sup>, 363.1385; found, 363.1391. HPLC conditions for determination of enantiomeric excess: Chiral IB-3, λ = 272 nm, hexane/2-propanol /ethanol = 97.5:1.25:1.25, flow rate = 1.0 mL/min, *t*<sub>major</sub> = 41.8 min, *t*<sub>minor</sub> = 45.1 min.

**(R)-8-Phenyl-1H-dibenzo[1,2:5,6]fluoreno[3,4-c]furan-3(8H)-one (4i)**

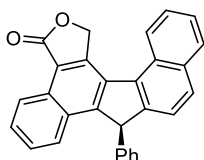

Yellow solid, 70.9 mg, 89% yield, 92% *ee*, mp: > 280 °C. <sup>1</sup>H NMR (400 MHz, CDCl<sub>3</sub>) (δ, ppm) δ 9.23 (d, *J* = 8.4 Hz, 1H), 8.42-8.28 (m, 1H), 7.96 (d, *J* = 7.8 Hz, 1H), 7.90-7.76 (m, 2H), 7.73-7.53 (comp, 3H), 7.46 (t, *J* = 8.8 Hz, 2H), 7.23 (comp, 3H), 7.04 (d, *J* = 7.0 Hz, 2H), 6.12 (d, *J* = 15.0 Hz, 1H), 5.92 (d, *J* = 14.8 Hz, 1H), 5.30 (s, 1H); <sup>13</sup>C NMR (100 MHz, CDCl<sub>3</sub>) (δ, ppm) δ 171.6, 152.5, 149.0, 142.2, 140.5, 135.1, 134.7, 134.0, 130.3, 130.0, 129.7, 129.4, 128.9, 128.5, 128.3, 128.1, 127.9, 127.5, 126.9, 125.7, 125.3, 124.2, 123.86, 123.2, 121.4, 71.8, 55.4. HRMS (TOF MS CI<sup>+</sup>) calculated for C<sub>26</sub>H<sub>19</sub>O<sub>2</sub> [M + H]<sup>+</sup>, 399.1385; found, 399.1378. HPLC conditions for determination of enantiomeric excess: Chiral IB-3, λ = 272 nm, hexane/2-propanol = 95:5, flow rate= 1.0

mL/min,  $t_{\text{major}} = 28.7$  min,  $t_{\text{minor}} = 37.4$  min.

**(E)-3-(2-(Phenylethynyl)phenyl)-4-(prop-1-en-1-yl)furan-2(5H)-one (4j)**

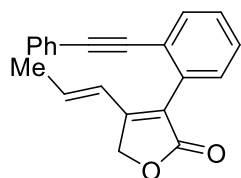

Yellow solid, 25.7 mg, 43% yield, mp: 95.3-95.6 °C.  $^1\text{H}$  NMR (400 MHz,  $\text{CDCl}_3$ ) ( $\delta$ , ppm)  $\delta$  7.73-7.66 (m, 1H), 7.50-7.39 (m, 5H), 7.39-7.34 (m, 3H), 6.50 (d,  $J = 16.1$  Hz, 1H), 6.28-6.16 (m, 1H), 5.13 (d,  $J = 6.8$  Hz, 2H), 1.90 (dd,  $J = 6.8, 1.6$  Hz, 3H);  $^{13}\text{C}$  NMR (100 MHz,  $\text{CDCl}_3$ ) ( $\delta$ , ppm)  $\delta$  173.4, 156.3, 135.6, 132.9, 132.4, 131.5, 130.4, 128.7, 128.5, 128.49, 128.45, 124.40, 123.8, 123.5, 123.3, 93.5, 88.3, 69.4, 19.2. HRMS (TOF MS  $\text{CI}^+$ ) calculated for  $\text{C}_{21}\text{H}_{16}\text{O}_2$  [ $\text{M} + \text{H}$ ] $^+$ , 300.1229; found, 300.1230.

**(R)-10-Chloro-8-(4-fluorophenyl)-1H-benzo[1,2]fluoreno[3,4-c]furan-3(8H)-one (4k)**

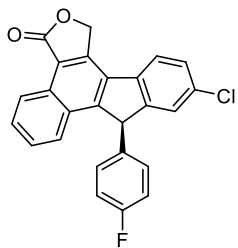

Yellow solid, 72.0 mg, 90% yield, 92% *ee*, mp: > 280 °C.  $^1\text{H}$  NMR (400 MHz,  $\text{CDCl}_3$ ) ( $\delta$ , ppm)  $\delta$  9.10 (d,  $J = 8.4$  Hz, 1H), 7.72 (d,  $J = 8.3$  Hz, 1H), 7.65 (t,  $J = 7.6$  Hz, 1H), 7.52 – 7.40 (m, 3H), 7.33 (s, 1H), 7.09 – 6.93 (m, 4H), 5.72 (q,  $J = 15.9$  Hz, 2H), 5.39 (s, 1H);  $^{13}\text{C}$  NMR (100 MHz,  $\text{CDCl}_3$ ) ( $\delta$ , ppm)  $\delta$  171.1, 163.5, 161.0, 150.6, 149.8, 142.4, 137.1, 135.4(d,  $J = 3.4$  Hz), 134.1, 132.3, 129.8(d,  $J = 8.1$  Hz), 129.5, 129.4, 128.5(d,  $J = 11.3$  Hz), 128.0, 126.0, 125.1, 124.6, 122.1, 120.9, 116.5 (d,  $J = 21.6$  Hz), 68.5, 54.2. HRMS (TOF MS  $\text{CI}^+$ ) calculated for  $\text{C}_{25}\text{H}_{15}\text{ClFO}_2$  [ $\text{M} + \text{H}$ ] $^+$ , 401.0745; found, 401.0748. HPLC conditions for determination of enantiomeric excess: Chiral IA-3,  $\lambda = 272$  nm, hexane/2-propanol = 96:4, flow rate= 1.0 mL/min,  $t_{\text{major}} = 23.9$  min,  $t_{\text{minor}} = 28.5$  min.

**(R)-10-Chloro-8-(4-chlorophenyl)-1H-benzo[1,2]fluoreno[3,4-c]furan-3(8H)-one (4l)**

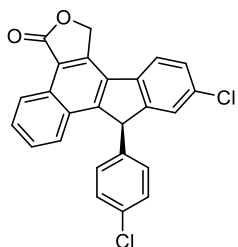

Yellow solid, 75.7 mg, 91% yield, 99% *ee*,  $[\alpha]_{\text{D}}^{20} = 118.4^\circ$  ( $c = 0.5$ , MeOH), mp: > 280 °C.  $^1\text{H}$  NMR (600 MHz,  $\text{CDCl}_3$ ) ( $\delta$ , ppm)  $\delta$  9.11 (d,  $J = 8.4$  Hz, 1H), 7.72 (d,  $J = 8.5$  Hz, 1H), 7.65 (t,  $J = 7.6$  Hz, 1H), 7.50 – 7.46 (m, 2H), 7.44 – 7.40 (m, 1H), 7.33 (s, 1H), 7.27 (s, 2H), 7.01 (d,  $J = 8.3$  Hz, 2H), 5.75 (dd,  $J = 31.8$  Hz,  $J = 15.7$  Hz, 2H), 5.43 (s, 1H);  $^{13}\text{C}$  NMR (150 MHz,  $\text{CDCl}_3$ ) ( $\delta$ , ppm)  $\delta$  171.1, 150.3, 149.5, 142.4, 138.3, 137.2, 134.2, 133.7, 132.5, 130.2, 129.8, 129.4, 129.0, 128.7, 128.57, 128.1, 126.0, 125.1, 124.7, 122.2, 121.0, 68.5, 54.4. HRMS (TOF MS  $\text{CI}^+$ ) calculated for  $\text{C}_{25}\text{H}_{15}\text{ClFO}_2$  [ $\text{M} + \text{H}$ ] $^+$ , 417.0449; found, 417.0441. HPLC conditions for determination of enantiomeric excess: Chiral IA-3,  $\lambda = 272$  nm, hexane/2-propanol = 96:4, flow rate= 1.0 mL/min,  $t_{\text{major}} = 16.5$  min.

**(R)-Methyl-4-(10-chloro-3-oxo-3,8-dihydro-1H-benzo[1,2]fluoreno[3,4-c]furan-8-yl)benzoate**

**(4m)**

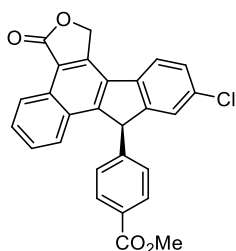

Yellow solid, 83.2 mg, 90% yield, 97 % *ee*,  $[\alpha]_D^{20} = 134.8^\circ$  ( $c = 0.5$ , MeOH), mp: > 280 °C. <sup>1</sup>H NMR (600 MHz, CDCl<sub>3</sub>) ( $\delta$ , ppm)  $\delta$  9.12 (d,  $J = 8.3$  Hz, 1H), 7.97 (d,  $J = 8.3$  Hz, 2H), 7.70 (d,  $J = 8.4$  Hz, 1H), 7.65 (s, 1H), 7.50 (d,  $J = 8.1$  Hz, 1H), 7.45 (d,  $J = 6.9$  Hz, 2H), 7.34 (s, 1H), 7.17 (d,  $J = 8.0$  Hz, 2H), 5.78 (q,  $J = 15.7$  Hz, 2H), 5.53 (s, 1H), 3.89 (s, 3H); <sup>13</sup>C NMR (150 MHz, CDCl<sub>3</sub>) ( $\delta$ , ppm)  $\delta$  171.1, 166.7, 150.0, 149.4, 145.1, 142.4, 137.4, 134.2, 132.6, 130.9, 130.2, 130.1, 129.8, 129.4, 129.0, 128.7, 128.1, 126.0, 125.0, 124.7, 122.2, 121.1, 68.5, 54.9, 52.3. HRMS (TOF MS ESI<sup>+</sup>) calculated for C<sub>27</sub>H<sub>17</sub>ClNaO<sub>4</sub> [M + Na]<sup>+</sup>, 463.0713; found, 463.0719. HPLC conditions for determination of enantiomeric excess: Chiral IA-3,  $\lambda = 272$  nm, hexane/2-propanol = 96:4, flow rate= 1.0 mL/min,  $t_{\text{major}} = 36.6$  min,  $t_{\text{minor}} = 33.4$  min.

**(R)-10-Chloro-8-(4-methoxyphenyl)-1H-benzo[1,2]fluoreno[3,4-c]furan-3(8H)-one (4n)**

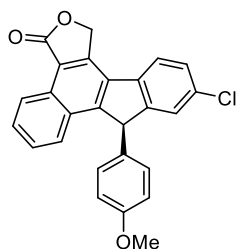

White solid, 70.9 mg, 86% yield, 90% *ee*, mp: 236.3-237.8 °C. <sup>1</sup>H NMR (400 MHz, CDCl<sub>3</sub>) ( $\delta$ , ppm)  $\delta$  9.03 (d,  $J = 8.4$  Hz, 1H), 7.71 (d,  $J = 8.4$  Hz, 1H), 7.62-7.58 (m, 1H), 7.47-7.43 (m, 1H), 7.41-7.36 (comp, 2H), 7.30 (s, 1H), 6.92 (d,  $J = 8.4$  Hz, 2H), 6.79 (d,  $J = 8.4$  Hz, 2H), 5.66 (d,  $J = 16.0$  Hz, 1H), 5.52-5.48 (m, 1H), 5.14 (s, 1H), 3.76 (s, 3H); <sup>13</sup>C NMR (100 MHz, CDCl<sub>3</sub>) ( $\delta$ , ppm)  $\delta$  171.1, 159.1, 151.1, 150.2, 142.3, 137.0, 134.0, 132.0, 131.4, 130.1, 129.2, 129.0, 128.4, 128.2, 127.8, 125.8, 125.2, 124.3, 121.9, 120.5, 114.9, 68.4, 55.3, 54.2. HRMS (TOF MS CI<sup>+</sup>) calculated for C<sub>26</sub>H<sub>18</sub>ClO<sub>3</sub> [M + H]<sup>+</sup>, 413.0944; found, 413.0937. HPLC conditions for determination of enantiomeric excess: Chiral IB-3,  $\lambda = 272$  nm, hexane/2-propanol /ethanol= 98.5:0.75:0.75, flow rate= 1.0 mL/min,  $t_{\text{major}} = 41.9$  min,  $t_{\text{minor}} = 44.7$  min.

**(R)-10-Chloro-8-(p-tolyl)-1H-benzo[1,2]fluoreno[3,4-c]furan-3(8H)-one (4o)**

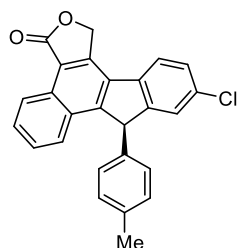

Yellow solid, 70.5 mg, 89% yield, 90% *ee*, mp: 219.3-220.5 °C. <sup>1</sup>H NMR (400 MHz, CDCl<sub>3</sub>) ( $\delta$ , ppm)  $\delta$  9.04 (d,  $J = 8.4$  Hz, 1H), 7.71 (d,  $J = 8.4$  Hz, 1H), 7.62-7.58 (m, 1H), 7.47-7.43 (m, 1H), 7.40-7.37 (comp, 2H), 7.32 (s, 1H), 7.07 (d,  $J = 8.0$  Hz, 2H), 6.89 (d,  $J = 8.0$  Hz, 2H), 5.68 (d,  $J = 16.0$  Hz, 1H), 5.53 (d,  $J = 16.0$  Hz, 1H), 5.19 (s, 1H), 2.30 (s, 3H); <sup>13</sup>C NMR (100 MHz, CDCl<sub>3</sub>) ( $\delta$ , ppm)  $\delta$  171.1, 151.0, 150.2, 142.3, 137.4, 137.1, 136.4, 134.0, 132.1, 130.2, 130.1, 129.2, 128.4, 128.2, 127.81, 127.79, 125.9, 125.2, 124.4, 121.9, 120.5, 68.4, 54.7, 21.2.

HRMS (TOF MS  $\text{Cl}^+$ ) calculated for  $\text{C}_{26}\text{H}_{18}\text{ClO}_2$   $[\text{M} + \text{H}]^+$ , 397.0995; found, 397.0993. HPLC conditions for determination of enantiomeric excess: Chiral IB-3,  $\lambda = 272$  nm, hexane/2-propanol = 98:1:1, flow rate = 1.0 mL/min,  $t_{\text{major}} = 38.22$  min,  $t_{\text{minor}} = 41.58$  min.

**(R)-10-Chloro-8-(*m*-tolyl)-1*H*-benzo[1,2]fluoreno[3,4-*c*]furan-3(8*H*)-one (4p)**

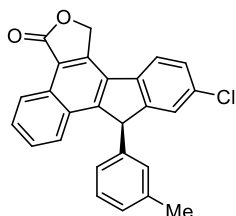

Yellow solid, 72.1 mg, 91% yield, 93% *ee*, mp: 210.5-211.7 °C.  $^1\text{H}$  NMR (400 MHz,  $\text{CDCl}_3$ ) ( $\delta$ , ppm)  $\delta$  9.08 (d,  $J = 8.4$  Hz, 1H), 7.75 (d,  $J = 8.4$  Hz, 1H), 7.65-7.61 (m, 1H), 7.48-7.42 (comp, 3H), 7.34 (s, 1H), 7.18 (t,  $J = 7.2$  Hz, 1H), 7.07 (d,  $J = 7.6$  Hz, 1H), 6.88 (d,  $J = 7.6$  Hz, 1H), 6.79 (s, 1H), 5.74 (d,  $J = 16.0$  Hz, 1H), 5.62 (d,  $J = 16.0$  Hz, 1H), 5.28 (s, 1H), 2.24 (s, 3H);  $^{13}\text{C}$  NMR (100 MHz,  $\text{CDCl}_3$ ) ( $\delta$ , ppm)  $\delta$  171.2, 150.9, 150.2, 142.4, 139.5, 139.3, 137.2, 134.0, 132.3, 130.3, 129.33, 129.26, 128.6, 128.5, 128.3, 127.9, 126.0, 125.3, 125.2, 124.4, 122.0, 120.6, 68.5, 55.1, 21.6. HRMS (TOF MS  $\text{Cl}^+$ ) calculated for  $\text{C}_{26}\text{H}_{18}\text{ClO}_2$   $[\text{M} + \text{H}]^+$ , 397.0995; found, 397.0992. HPLC conditions for determination of enantiomeric excess: Chiral IA-3,  $\lambda = 272$  nm, hexane/2-propanol = 93:7, flow rate = 1.0 mL/min,  $t_{\text{major}} = 29.7$  min,  $t_{\text{minor}} = 32.7$  min.

**(R)-10-Chloro-8-(*o*-tolyl)-1*H*-benzo[1,2]fluoreno[3,4-*c*]furan-3(8*H*)-one (4q)**

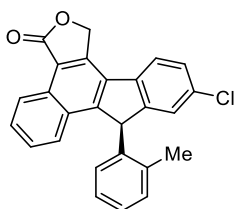

Yellow solid, 68.9 mg, 87% yield, 96% *ee*,  $[\alpha]_{\text{D}}^{20} = 132.4^\circ$  ( $c = 0.5$ , MeOH), mp: 232.5-233.7 °C.  $^1\text{H}$  NMR (400 MHz,  $\text{CDCl}_3$ ) ( $\delta$ , ppm)  $\delta$  9.07 (d,  $J = 8.4$  Hz, 1H), 7.73-7.68 (m, 1H), 7.64-7.60 (m, 1H), 7.49-7.41 (comp, 3H), 7.36-7.31 (m, 2H), 7.04 (d,  $J = 7.6$  Hz, 1H), 6.89-6.85 (m, 2H), 5.72-5.76 (m, 1H), 5.50-5.43 (m, 1H), 5.12-5.04 (m, 1H), 2.28 (s, 3H);  $^{13}\text{C}$  NMR (100 MHz,  $\text{CDCl}_3$ ) ( $\delta$ , ppm)  $\delta$  171.3, 150.3, 149.4, 142.7, 138.5, 137.3, 137.0, 133.1 (d,  $J = 3.2$  Hz), 130.2 (d,  $J = 2.5$  Hz), 130.0, 129.1 (d,  $J = 1.9$  Hz), 128.2, 128.0, 127.8, 127.6, 125.4, 125.33, 125.31, 124.3 (d,  $J = 1.4$  Hz), 121.1, 120.2, 68.5, 54.6, 21.2. HRMS (TOF MS  $\text{Cl}^+$ ) calculated for  $\text{C}_{26}\text{H}_{18}\text{ClO}_2$   $[\text{M} + \text{H}]^+$ , 397.0995; found, 397.0999. HPLC conditions for determination of enantiomeric excess: Chiral IA-3,  $\lambda = 272$  nm, hexane/2-propanol = 92:8, flow rate = 1.0 mL/min,  $t_{\text{major}} = 13.4$  min,  $t_{\text{minor}} = 12.6$  min.



**(R)-8-(4-Bromophenyl)-1H-benzo[1,2]fluoreno[3,4-c]furan-3(8H)-one (4r)**

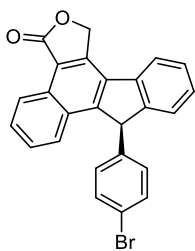

Yellow solid, 74.1 mg, 87% yield, 90% *ee*, mp: 253.5-254.8 °C. <sup>1</sup>H NMR (400 MHz, CDCl<sub>3</sub>) (δ, ppm) δ 9.11 (d, *J* = 8.4 Hz, 1H), 7.73 (d, *J* = 8.4 Hz, 1H), 7.67-7.63 (m, 1H), 7.57-7.55 (m, 1H), 7.50-7.44 (m, 2H), 7.40-7.32 (comp, 3H), 6.95 (d, *J* = 8.0 Hz, 2H), 5.79 (d, *J* = 16.0 Hz, 1H), 5.72-5.68 (m, 1H), 5.35 (s, 1H); <sup>13</sup>C NMR (100 MHz, CDCl<sub>3</sub>) (δ, ppm) δ 171.3, 149.5, 148.6, 142.6, 139.6, 138.7, 133.4, 132.5, 130.2, 129.7, 129.3, 128.4, 128.22, 128.19, 127.9, 125.4, 125.1, 124.6, 121.4, 121.3, 120.7, 68.6, 54.4. HRMS (TOF MS CI<sup>+</sup>) calculated for C<sub>25</sub>H<sub>15</sub>BrO<sub>2</sub> [M + H]<sup>+</sup>, 427.0334; found, 427.0327. HPLC conditions for determination of enantiomeric excess: Chiral IA-3, λ = 272 nm, hexane/2-propanol /ethanol= 98.5:0.75:0.75, flow rate= 1.0 mL/min, *t*<sub>major</sub> = 53.8 min, *t*<sub>minor</sub> = 60.2 min.

**(R)-8-(*tert*-Butyl)-10-chloro-1H-benzo[1,2]fluoreno[3,4-c]furan-3(8H)-one (4s)**

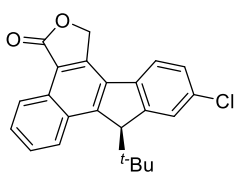

Yellow solid, 60.1 mg, 83% yield, 68% *ee*, mp: 183.4-184.6 °C. <sup>1</sup>H NMR (600 MHz, CDCl<sub>3</sub>) (δ, ppm) δ 9.12 – 9.07 (m, 1H), 8.18 (d, *J* = 8.3 Hz, 1H), 7.69 – 7.65 (m, 1H), 7.64 – 7.60 (m, 2H), 7.42 – 7.38 (m, 1H), 7.35 (d, *J* = 8.0 Hz, 1H), 5.74 (d, *J* = 15.5 Hz, 1H), 5.60 (d, *J* = 15.5 Hz, 1H), 4.44 (s, 1H), 0.92 (s, 9H); <sup>13</sup>C NMR (150 MHz, CDCl<sub>3</sub>) (δ, ppm) δ 171.2, 151.6, 149.5, 142.1, 139.0, 132.3, 131.3, 129.7, 129.2, 128.9, 128.1, 127.9, 126.8, 126.5, 124.1, 121.5, 120.1, 68.4, 58.8, 51.8, 29.3. HRMS (TOF MS CI<sup>+</sup>) calculated for C<sub>23</sub>H<sub>20</sub>ClO<sub>2</sub> [M + H]<sup>+</sup>, 363.1152; found, 363.1155. HPLC conditions for determination of enantiomeric excess: Chiral IA-3, λ = 272 nm, hexane/2-propanol = 92:8, flow rate= 1.0 mL/min, *t*<sub>major</sub> = 18.9 min, *t*<sub>minor</sub> = 18.2 min.

**(R)-10-Chloro-8-(triisopropylsilyl)-1H-benzo[1,2]fluoreno[3,4-c]furan-3(8H)-one (4t)**

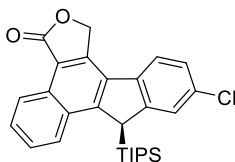

White solid, 75.5 mg, 78% yield, 84% *ee*, mp: 184.2-189.3 °C. <sup>1</sup>H NMR (400 MHz, CDCl<sub>3</sub>) (δ, ppm) δ 9.08 (d, *J* = 8.3 Hz, 1H), 7.94 (d, *J* = 8.3 Hz, 1H), 7.71 (t, *J* = 7.2 Hz, 1H), 7.62 (t, *J* = 7.1 Hz, 1H), 7.54 (s, 1H), 7.40 (m, 1H), 7.34 (d, *J* = 8.1 Hz, 1H), 5.55 (d, *J* = 15.8 Hz, 1H), 5.32 (d, *J* = 15.8 Hz, 1H), 4.33 (s, 1H), 1.08 (m, 3H), 0.76 (d, *J* = 7.4 Hz, 9H), 0.65 (d, *J* = 7.5 Hz, 9H); <sup>13</sup>C NMR (100 MHz, CDCl<sub>3</sub>) (δ, ppm) δ 171.4, 152.3, 148.4, 142.9, 137.6, 132.1, 129.7, 129.6, 128.2, 128.1, 126.3, 126.2, 125.8, 124.9, 124.3, 121.7, 118.1, 68.2, 41.0, 18.5, 18.4, 12.1. HRMS (TOF MS ESI<sup>+</sup>) calculated for C<sub>28</sub>H<sub>31</sub>ClNaO<sub>2</sub>Si [M + Na]<sup>+</sup>, 485.1680; found, 485.1678. HPLC conditions for determination of enantiomeric excess: Chiral IA-3, λ = 272 nm, hexane/2-propanol = 91:9, flow rate= 1.0 mL/min, *t*<sub>major</sub> = 16.6 min, *t*<sub>minor</sub> = 14.7 min.

### 1*H*-Benzo[1,2]fluoreno[3,4-*c*]furan-3(8*H*)-one (**4u**)

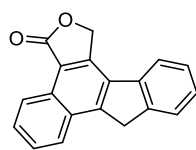

Yellow solid, 22.3 mg, 41% yield, mp: 163.4-164.8 °C. <sup>1</sup>H NMR (400 MHz, CDCl<sub>3</sub>) (δ, ppm) δ 9.10-9.07 (m, 1H), 8.10-8.08 (m, 1H), 7.73-7.66 (comp, 3H), 7.54-7.40 (comp, 3H), 5.65 (s, 2H), 4.27 (s, 2H); <sup>13</sup>C NMR (100 MHz, CDCl<sub>3</sub>) (δ, ppm) δ 171.5, 147.7, 143.2, 143.0, 140.4, 132.9, 130.6, 128.6, 128.4, 127.8, 127.6, 127.5, 125.5, 124.6, 124.5, 121.3, 119.6, 68.6, 36.9. HRMS (TOF MS CI<sup>+</sup>) calculated for C<sub>19</sub>H<sub>12</sub>O<sub>2</sub> [M + H]<sup>+</sup>, 273.0916; found, 273.0923.

### 3-Phenylprop-2-yn-1-yl 2-hydroxy-2-[2-(phenylethynyl)phenyl]acetate (**5a**)

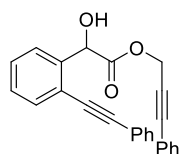

Colorless oil, <sup>1</sup>H NMR (400 MHz, CDCl<sub>3</sub>) (δ, ppm) δ 7.62 – 7.53 (comp, 3H), 7.47 – 7.42 (m, 1H), 7.37 – 7.23 (comp, 10H), 5.70 (d, *J* = 5.7 Hz, 1H), 4.98 (dd, *J* = 76.8, 15.5 Hz, 2H), 3.65 (dd, *J* = 5.7, 2.2 Hz, 1H); <sup>13</sup>C NMR (100 MHz, CDCl<sub>3</sub>) (δ, ppm) δ 173.0, 139.5, 132.9, 132.0, 131.7, 128.9, 128.9, 128.7, 128.7, 128.5, 128.4, 127.7, 123.0, 122.6, 122.0, 94.6, 87.2, 86.7, 82.2, 72.2, 54.4. HRMS (TOF MS CI<sup>+</sup>) calculated for C<sub>25</sub>H<sub>19</sub>O<sub>3</sub> [M + H]<sup>+</sup>, 367.1334; found, 367.1339.

## General Procedure of the Scale Up and Synthesis of **6c**, **7c** and **8c**.

### Gram scale reaction for the synthesis of **4c**.

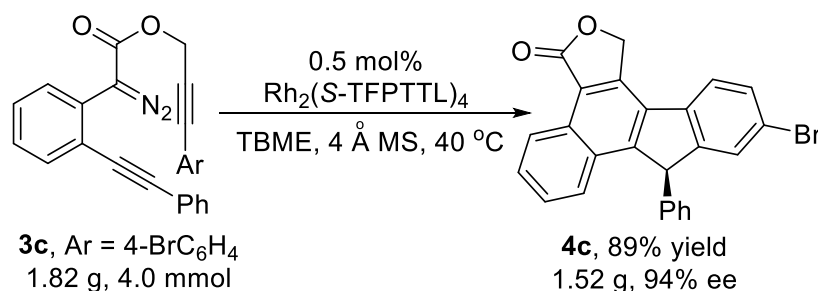

To a 50-mL oven-dried flask containing a magnetic stirring bar, diazo compound **3c** (1.82g, 4.0 mmol) and 4Å MS (1.3 g) in TBME (20 ml), Rh<sub>2</sub>(S-TFPTTL)<sub>4</sub> (23.0 mg, 0.5 mol%) was added in TBME (5.0 ml) *via* a syringe pump over 2 h under argon at 40 °C, and the reaction mixture was stirred for additional 20 min. After evaporating the solvents, the residue was purified by column chromatography on silica gel without any additional treatment (Hexanes: DCM = 2:1 to 1:1) to give 1.52 g of **4c** (89% yield) with 94% *ee*.

### Synthesis of **6c**.<sup>7</sup>

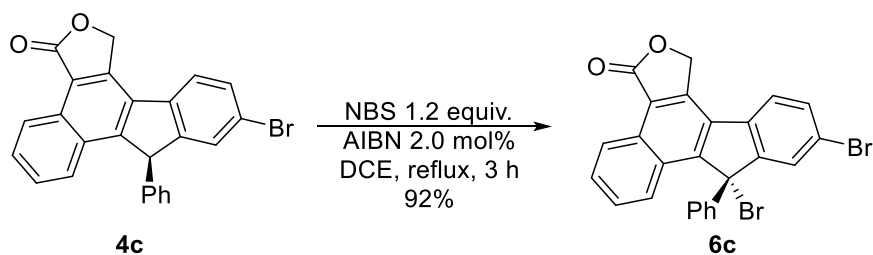

To a 10 mL oven-dried glassware containing a magnetic stirring bar and **4c** (85.4 mg, 0.2 mmol) in DCE (2.0 mL), NBS (42 mg, 0.24 mmol) and AIBN (1.0 mg, 2.0 mmol%) was added under refluxing. After the reaction was completed (monitored by TLC), the reaction mixture was cooled to room temperature, and purified by column chromatography on silica gel (Hexanes:DCM = 2:1) to give **6c** as yellow solid (93.1 mg, 92% yield), mp: > 280 °C. <sup>1</sup>H NMR (600 MHz, CDCl<sub>3</sub>) (δ, ppm) δ 9.18 (d, *J* = 8.4 Hz, 1H), 7.83 (d, *J* = 8.5 Hz, 1H), 7.69 (t, *J* = 7.6 Hz, 1H), 7.65 (s, 1H), 7.58 – 7.52 (m, 2H), 7.44 (d, *J* = 7.3 Hz, 2H), 7.36 (d, *J* = 8.0 Hz, 1H), 7.34 – 7.27 (m, 3H), 5.76 (dd, *J* = 20.4, 15.6 Hz, 2H); <sup>13</sup>C NMR (150 MHz, CDCl<sub>3</sub>) (δ, ppm) δ 170.7, 153.6, 149.8, 142.0, 138.5, 134.3, 132.6, 130.3, 129.9, 129.4, 129.2, 129.0, 128.96, 128.9, 127.9, 127.2, 126.3, 124.6, 123.2, 122.9, 122.4, 68.4, 65.8. HRMS (TOF MS ESI) calculated for C<sub>25</sub>H<sub>14</sub>Br<sub>2</sub>NaO<sub>2</sub> [M + Na]<sup>+</sup>, 528.9238; found, 528.9243.

### Synthesis of **7c**.<sup>8</sup>

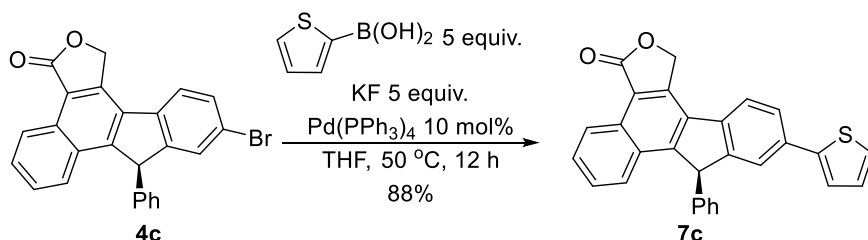

To a 10-mL oven-dried vial containing a magnetic stirring bar, **4c** (85.4 mg, 0.2 mmol), KF (58.1 mg, 1.0 mmol), Pd(PPh<sub>3</sub>)<sub>4</sub> (23.1 mg, 10 mol%) and thiophen-2-yl boronic acid (128.0 mg, 1.0 mmol), was added THF (5.0 mL) under argon atmosphere. Then the reaction mixture was stirred at 50 °C for 12 h. After the reaction was completed (monitored by TLC), the reaction mixture was cooled to room temperature and quenched with water (20 mL). The reaction mixture was extracted with EtOAc (20 mL). The organic layer was dried over anhydrous Na<sub>2</sub>SO<sub>4</sub> and concentrated under reduced pressure after filtrations. The obtained residue was purified by flash column chromatography on silica gel (Hexanes: DCM = 2:1) to give 75.7 mg of coupling product **7c** as yellow solid (88% yield), mp: 233.3-234.8 °C. <sup>1</sup>H NMR (400 MHz, CDCl<sub>3</sub>) (δ, ppm) δ 9.10 (d, *J* = 8.4 Hz, 1H), 7.78 (d, *J* = 8.4 Hz, 1H), 7.72 – 7.67 (m, 1H), 7.66 – 7.60 (m, 1H), 7.58 (s, 1H), 7.53

(d,  $J = 7.9$  Hz, 1H), 7.49 – 7.42 (m, 1H), 7.34 – 7.25 (comp, 5H), 7.14 – 7.05 (comp, 3H), 5.74 (dd,  $J = 37.4, 15.9$  Hz, 2H), 5.42 (s, 1H);  $^{13}\text{C}$  NMR (100 MHz,  $\text{CDCl}_3$ ) ( $\delta$ , ppm)  $\delta$  171.3, 150.4, 150.0, 144.1, 142.6, 140.3, 137.9, 134.4, 132.9, 130.3, 129.4, 129.2, 128.3, 128.1, 127.8, 127.6, 125.9, 125.4, 125.3, 124.5, 123.7, 122.9, 121.6, 120.6, 68.6, 55.2. HRMS (TOF MS ESI) calculated for  $\text{C}_{29}\text{H}_{18}\text{NaO}_2\text{S}[\text{M} + \text{Na}]^+$ , 453.0925; found, 453.0929.

### Synthesis of **8c**.<sup>9</sup>

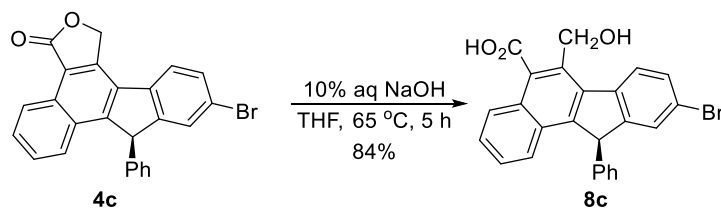

To a 50-mL flask containing a magnetic stirring bar and **4c** (128.2 mg, 0.3 mmol) in THF (50 mL), was added 10% aqueous sodium hydroxide solution (6.0 mL). Then the reaction mixture was stirred at 65 °C for 5 h. The reaction mixture was cooled to room temperature and acidified with saturated aqueous  $\text{KHSO}_4$  solution (to  $\text{pH} \sim 3.0$ ), and the resulting precipitate was collected by filtration, washed with water (5.0 mL) and dried under *vacuo* to give 112.2 mg pure product **8c** as yellow solid (84 % yield), mp: > 280 °C.  $^1\text{H}$  NMR (400 MHz, DMSO) ( $\delta$ , ppm)  $\delta$  8.92 (d,  $J = 8.3$  Hz, 1H), 8.02 (d,  $J = 8.4$  Hz, 1H), 7.74 – 7.68 (m, 1H), 7.66 (t,  $J = 4.0$  Hz, 2H), 7.58 – 7.52 (m, 1H), 7.43 (s, 1H), 7.33 – 7.17 (m, 5H), 7.02 (s, 1H), 5.98 (dd, 2H);  $^{13}\text{C}$  NMR (101 MHz, DMSO) ( $\delta$ , ppm)  $\delta$  170.7, 155.3, 152.1, 143.7, 142.8, 135.8, 131.7, 130.62, 130.61, 129.3, 128.62, 128.61, 128.6, 127.4, 127.2, 125.9, 124.6, 124.2, 123.0, 121.6, 120.3, 83.8, 68.9. HRMS (TOF MS ESI) calculated for  $\text{C}_{25}\text{H}_{17}\text{BrNaO}_3[\text{M} + \text{Na}]^+$ , 467.0259; found, 467.0266.

## Supplementary Figures

### 1D-Noe Study of 4g and 4g'

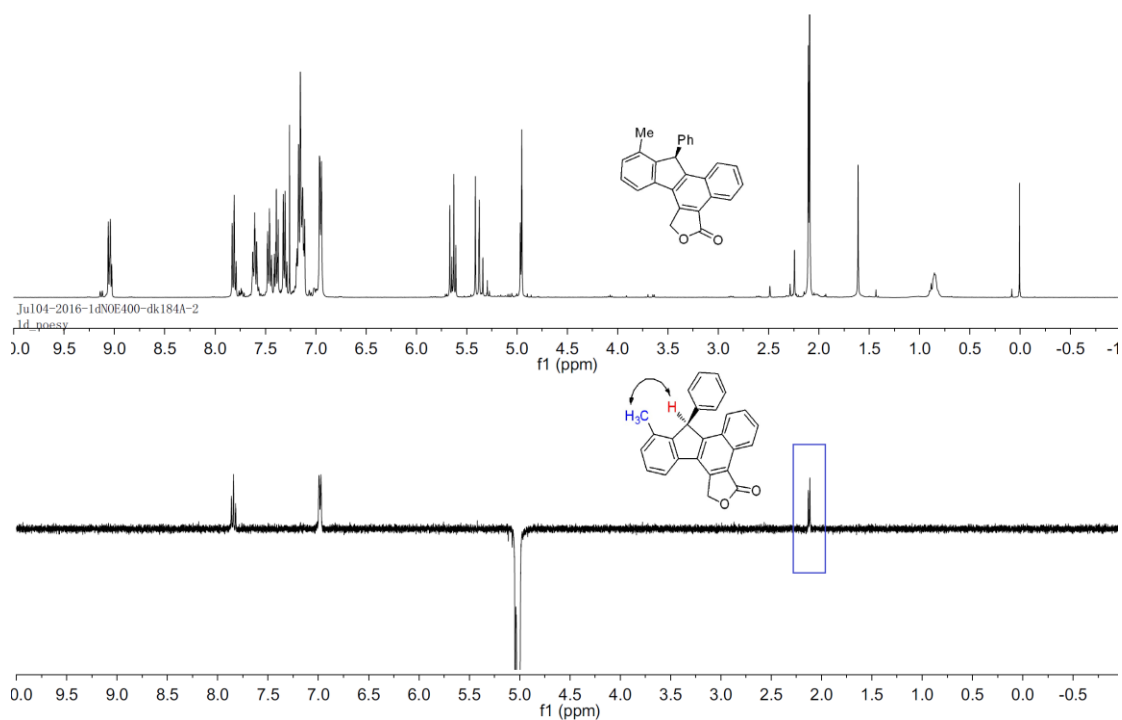

Supplementary Figure 1. 1D-Noe Study of 4g (400 MHz, CDCl<sub>3</sub>)

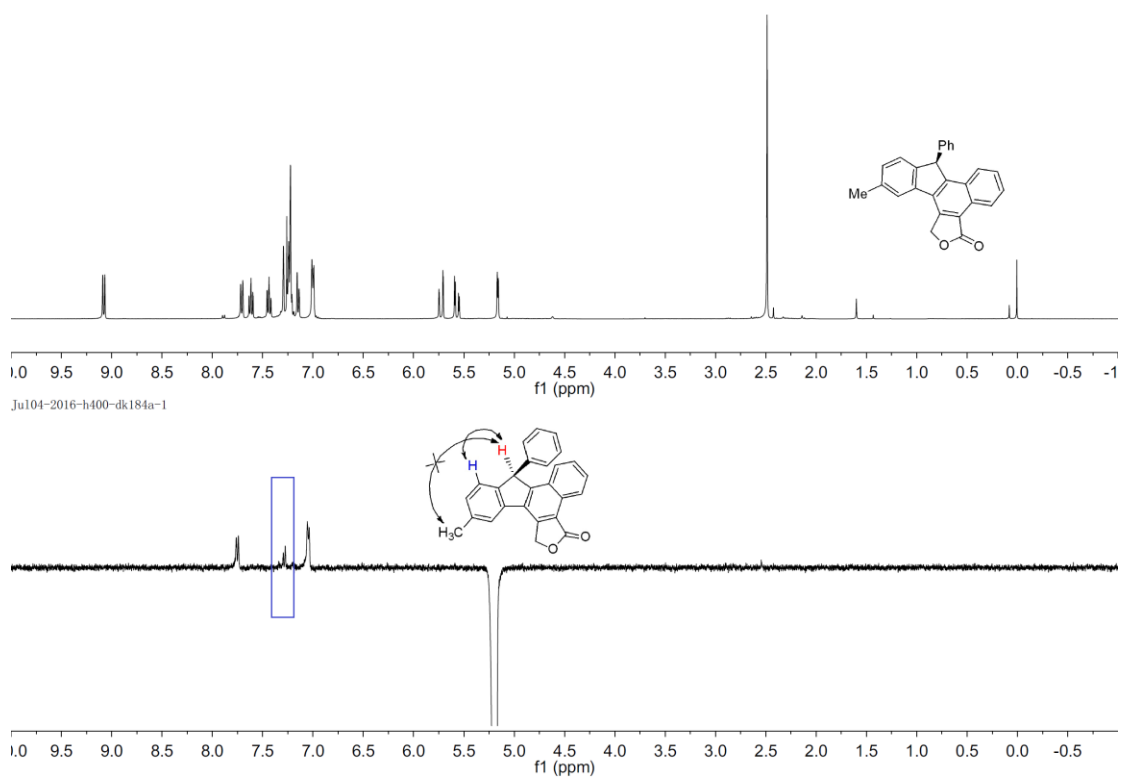

Supplementary Figure 2. 1D-Noe Study of 4g' (400 MHz, CDCl<sub>3</sub>)

## Control Reaction in NMR Tube

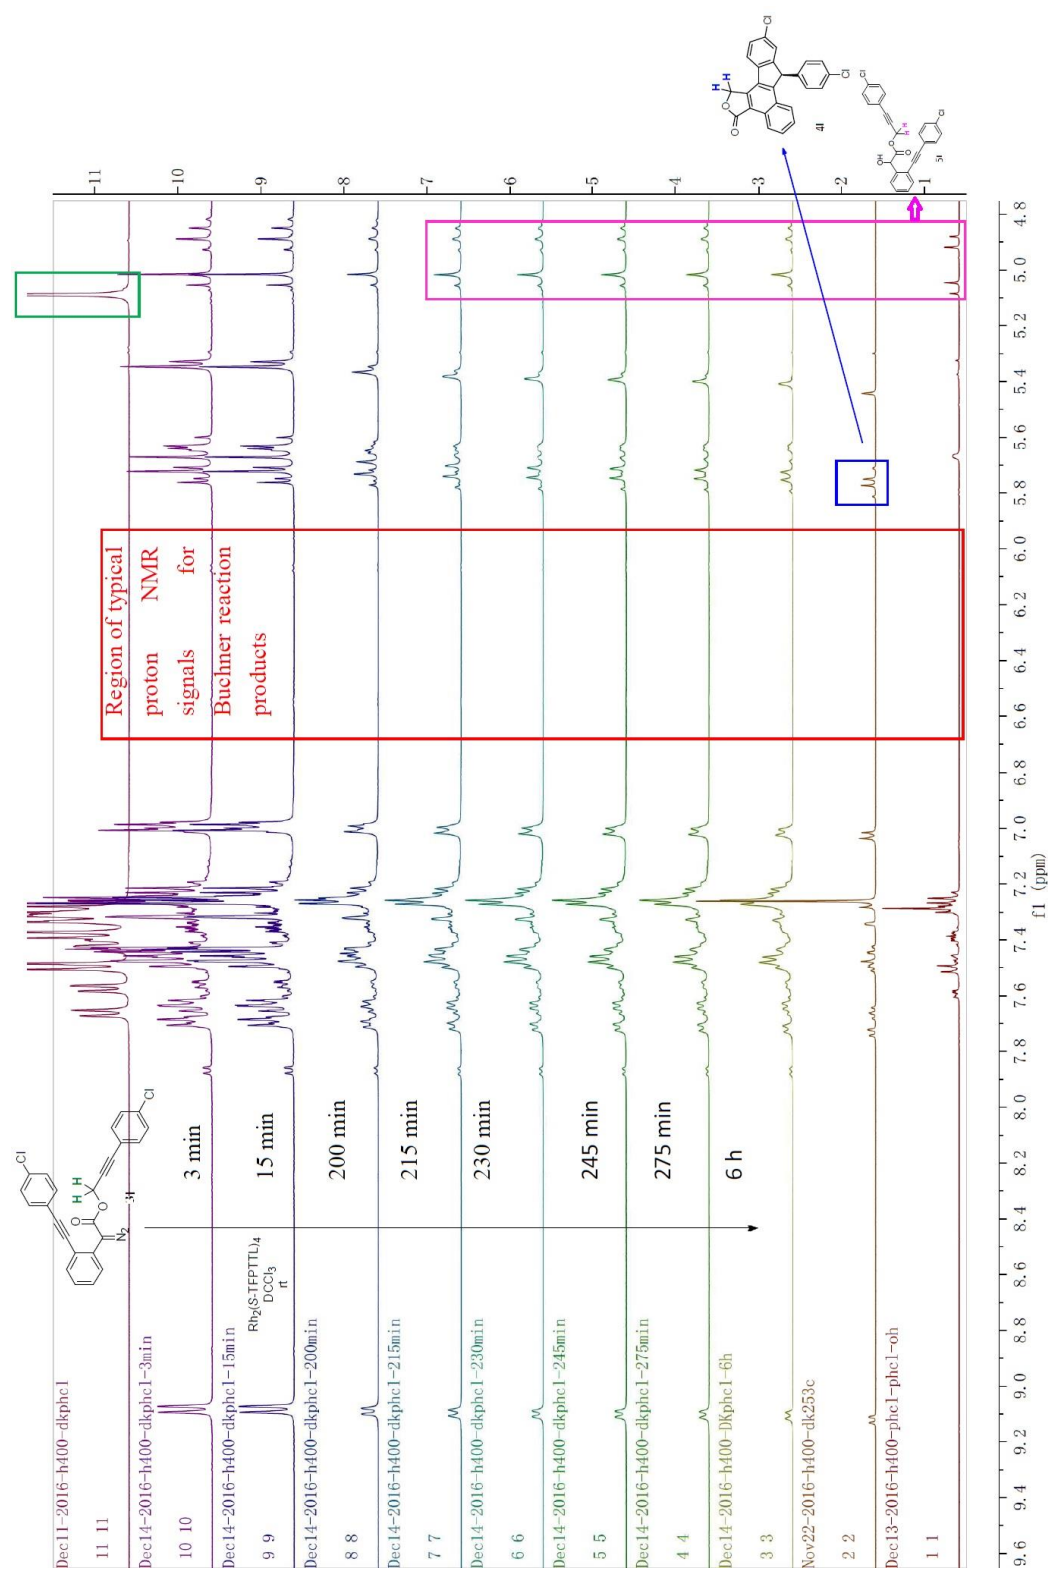

Supplementary Figure 3. Control Reaction in NMR Tube (400 MHz,  $\text{CDCl}_3$ )

## NMR Spectra of New Compounds

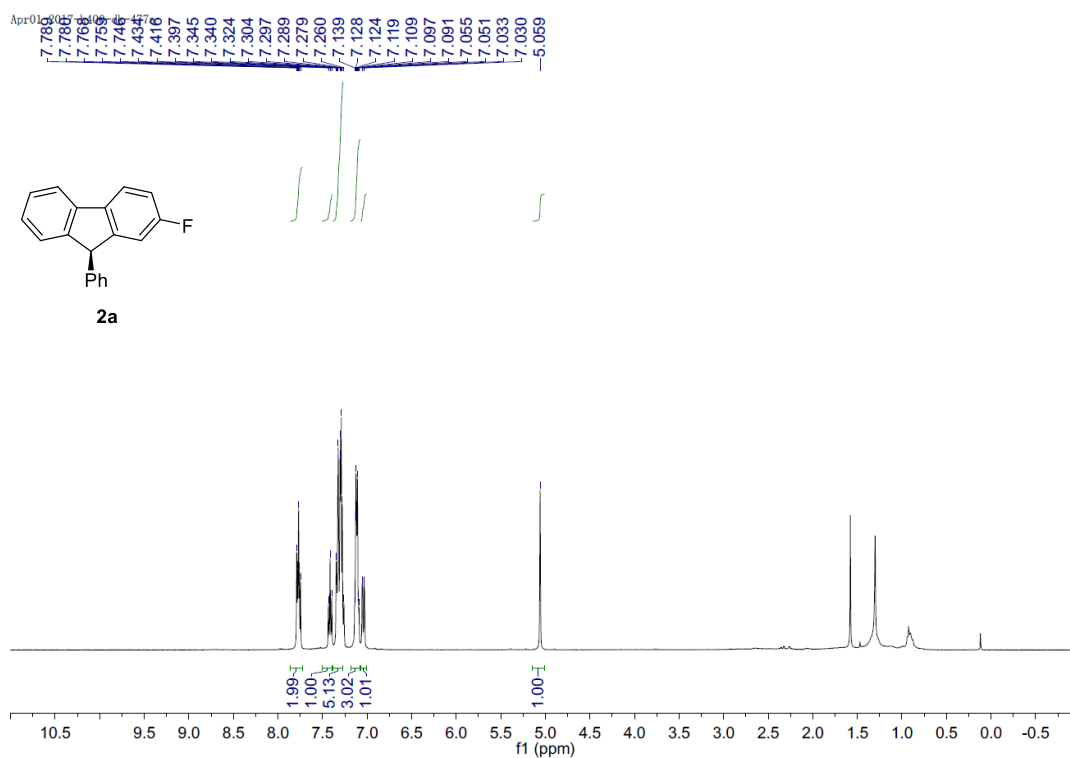

Supplementary Figure 4. <sup>1</sup>H NMR (400 MHz, CDCl<sub>3</sub>) spectrum for 2a

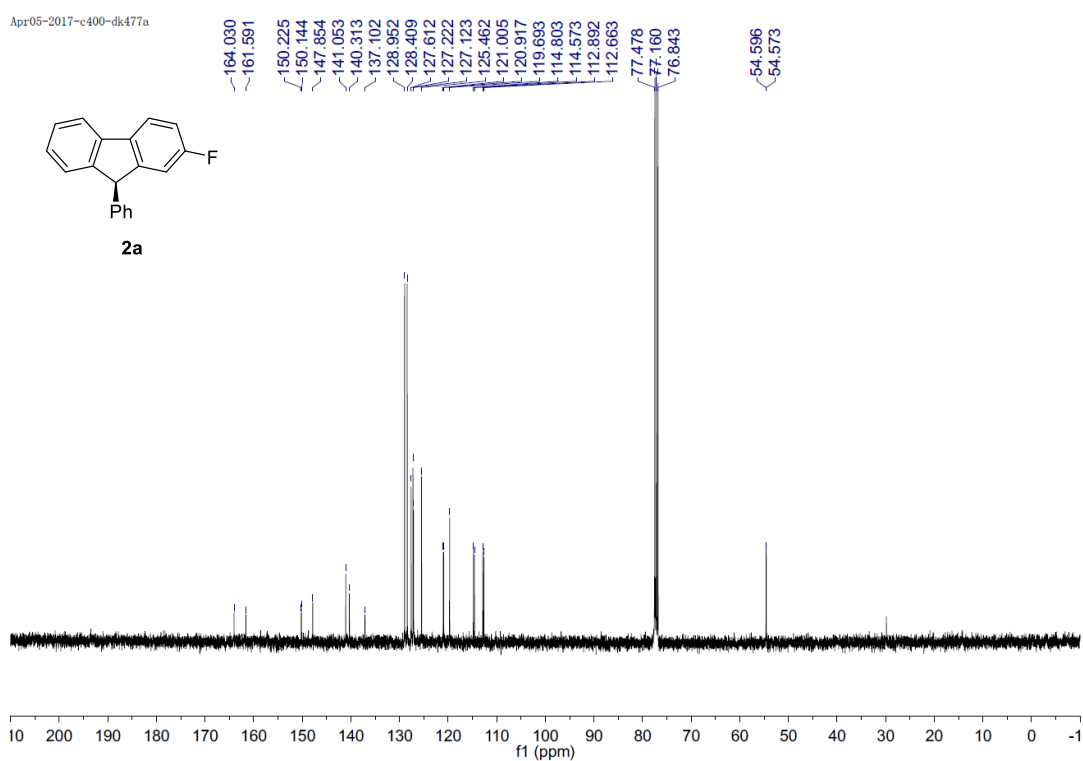

Supplementary Figure 5. <sup>13</sup>C NMR (100 MHz, CDCl<sub>3</sub>) spectrum for 2a

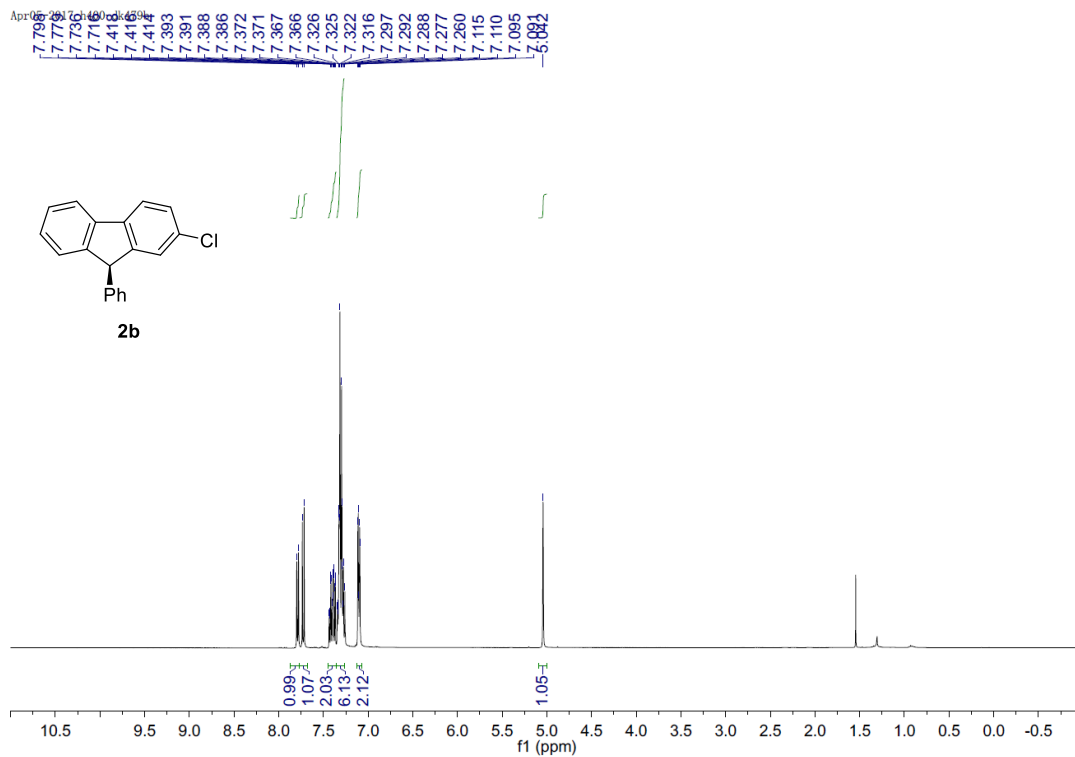

Supplementary Figure 6.  $^1\text{H}$  NMR (400 MHz,  $\text{CDCl}_3$ ) spectrum for **2b**

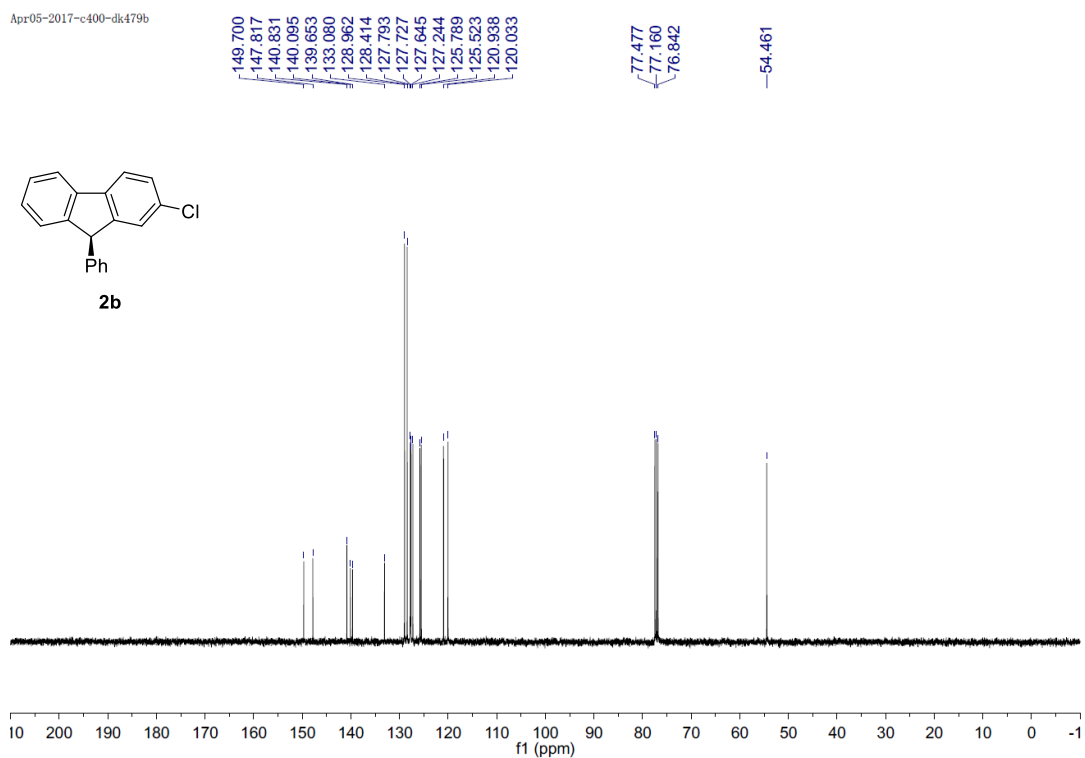

Supplementary Figure 7.  $^{13}\text{C}$  NMR (100 MHz,  $\text{CDCl}_3$ ) spectrum for **2b**



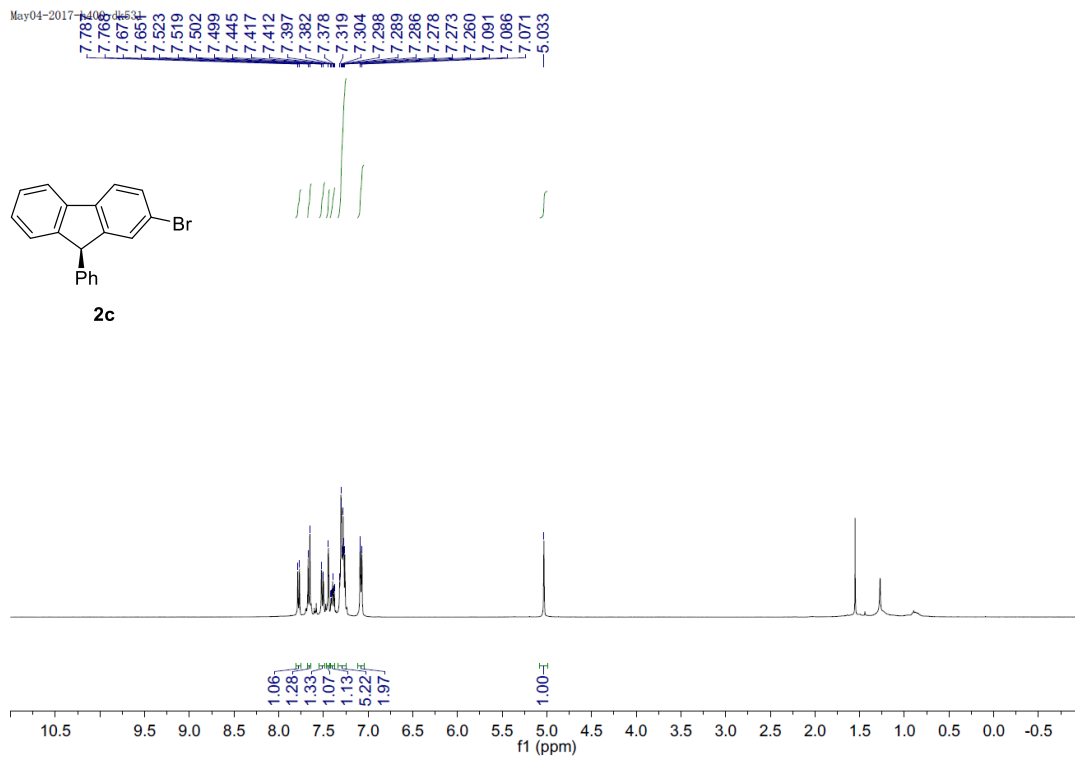

Supplementary Figure 8.  $^1\text{H}$  NMR (400 MHz,  $\text{CDCl}_3$ ) spectrum for **2c**

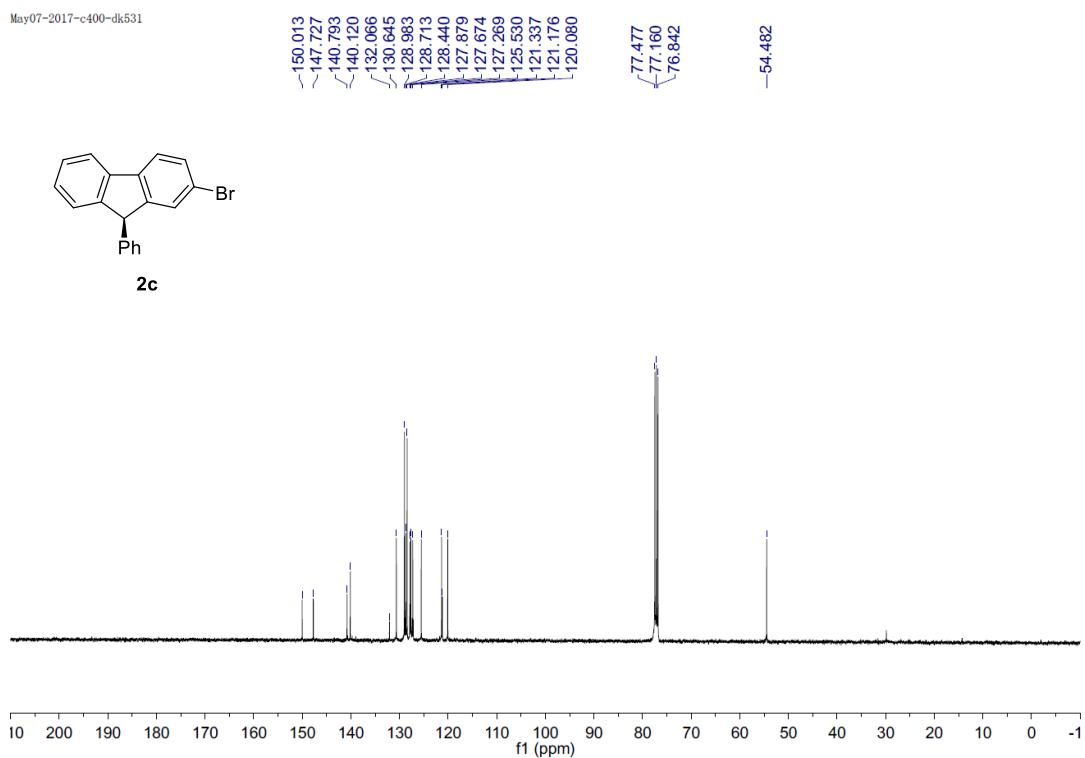

Supplementary Figure 9.  $^{13}\text{C}$  NMR (100 MHz,  $\text{CDCl}_3$ ) spectrum for **2c**

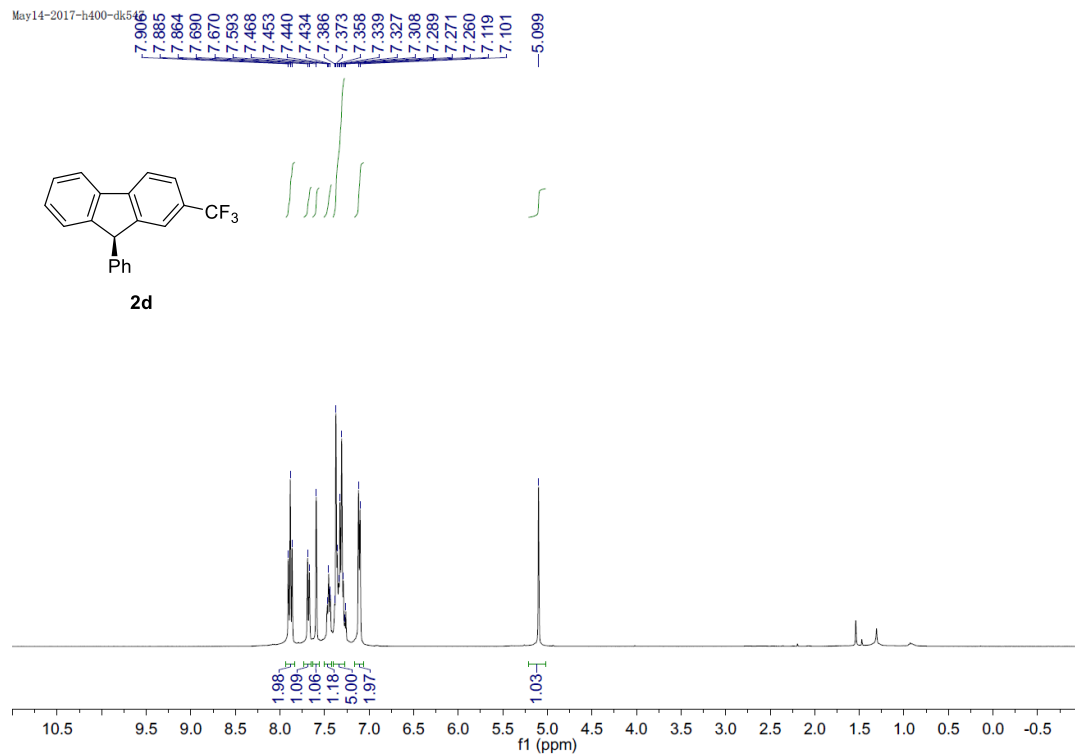

Supplementary Figure 10.  $^1\text{H}$  NMR (400 MHz,  $\text{CDCl}_3$ ) spectrum for **2d**

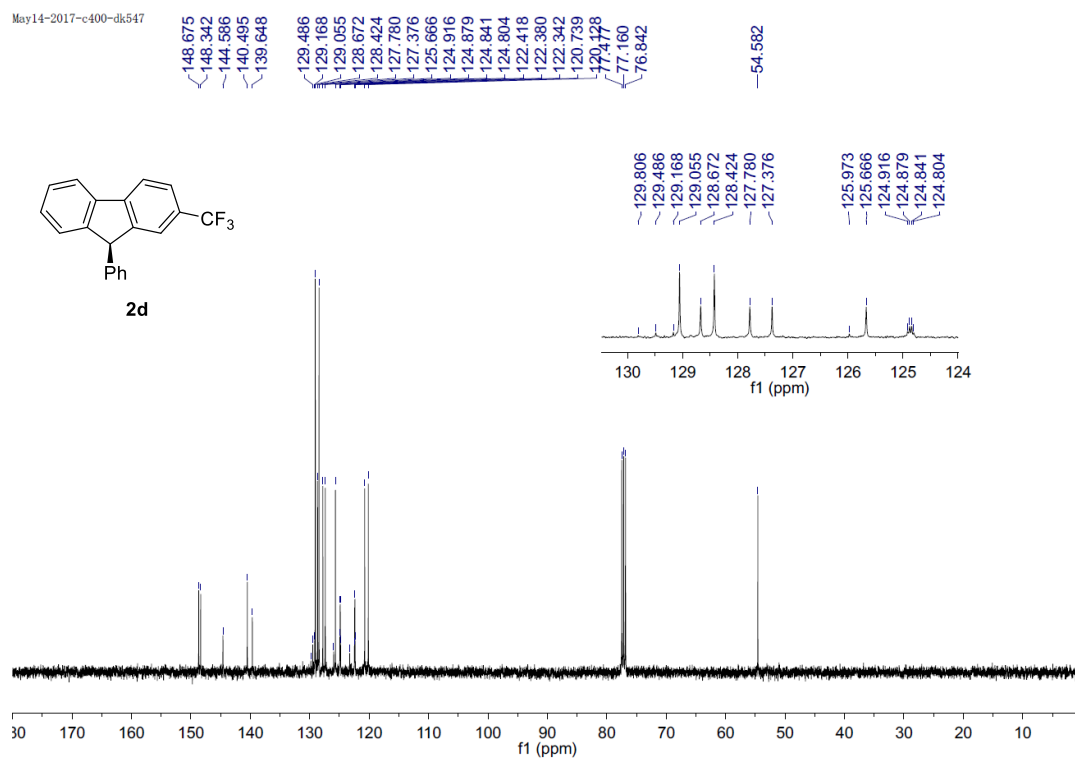

Supplementary Figure 11.  $^{13}\text{C}$  NMR (100 MHz,  $\text{CDCl}_3$ ) spectrum for **2d**

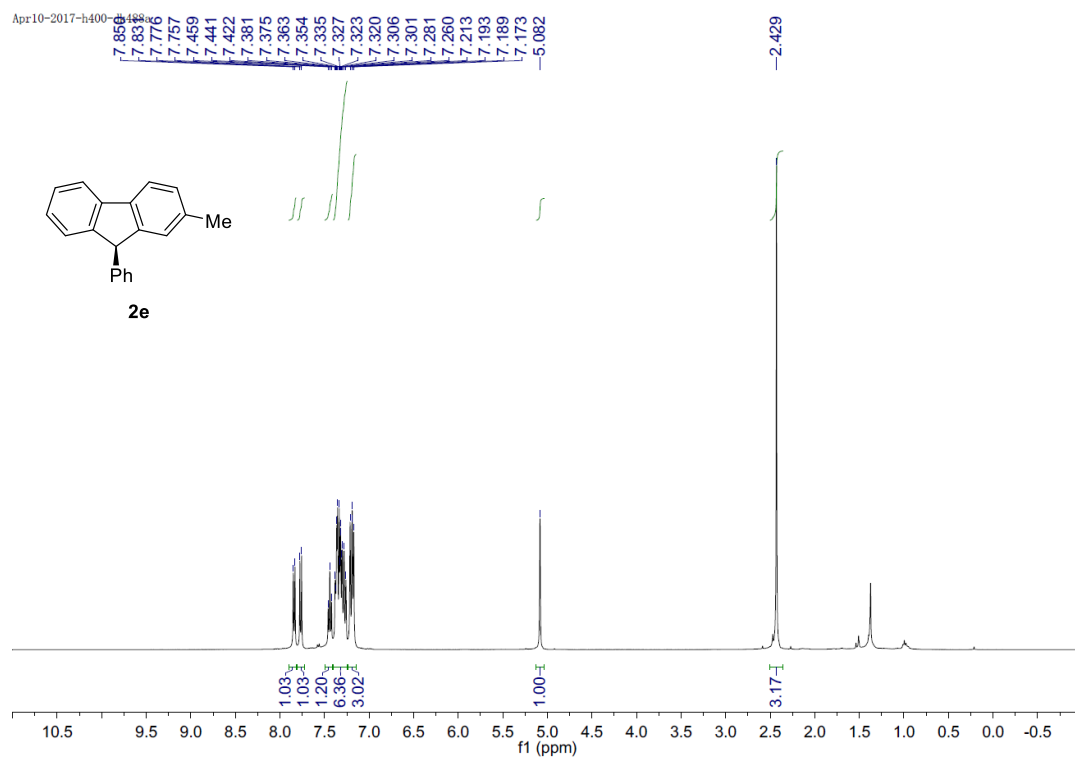

Supplementary Figure 12.  $^1\text{H}$  NMR (400 MHz,  $\text{CDCl}_3$ ) spectrum for **2e**

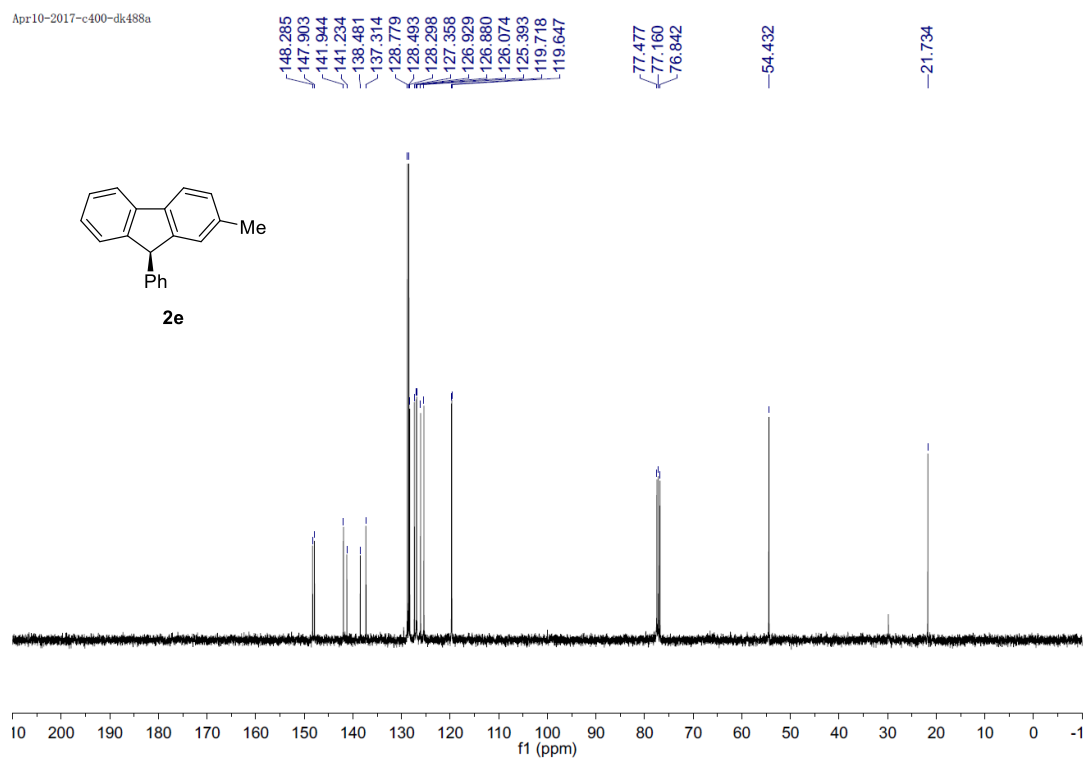

Supplementary Figure 13.  $^{13}\text{C}$  NMR (100 MHz,  $\text{CDCl}_3$ ) spectrum for **2e**

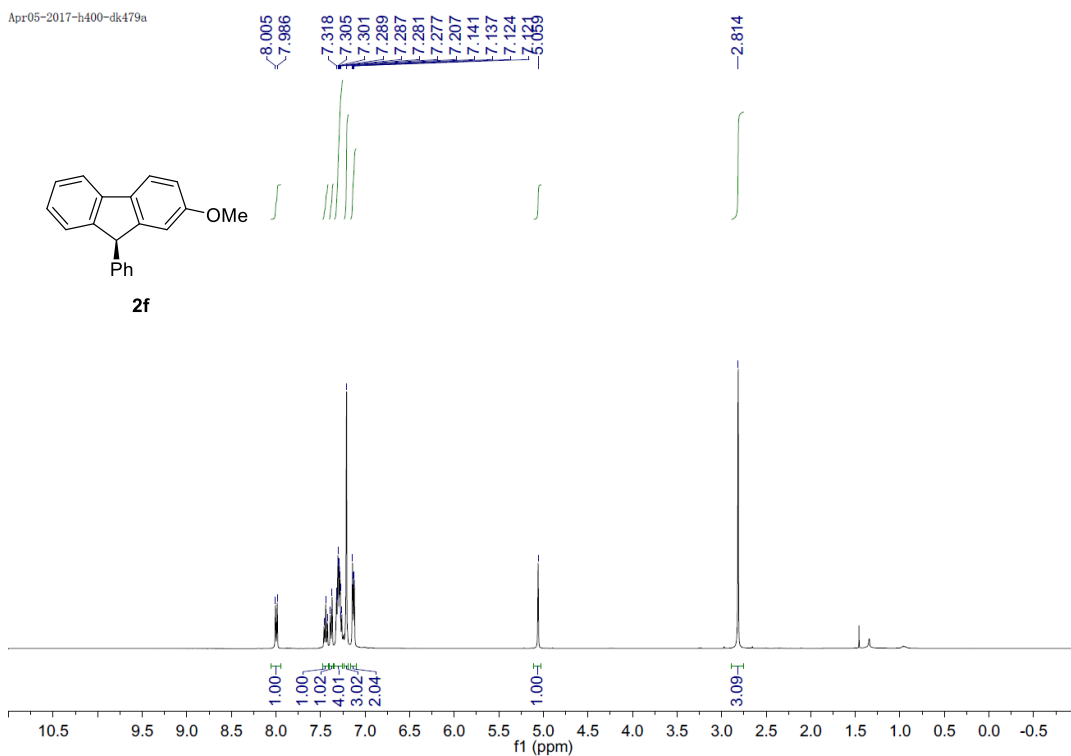

Supplementary Figure 14.  $^1\text{H NMR}$  (400 MHz,  $\text{CDCl}_3$ ) spectrum for **2f**

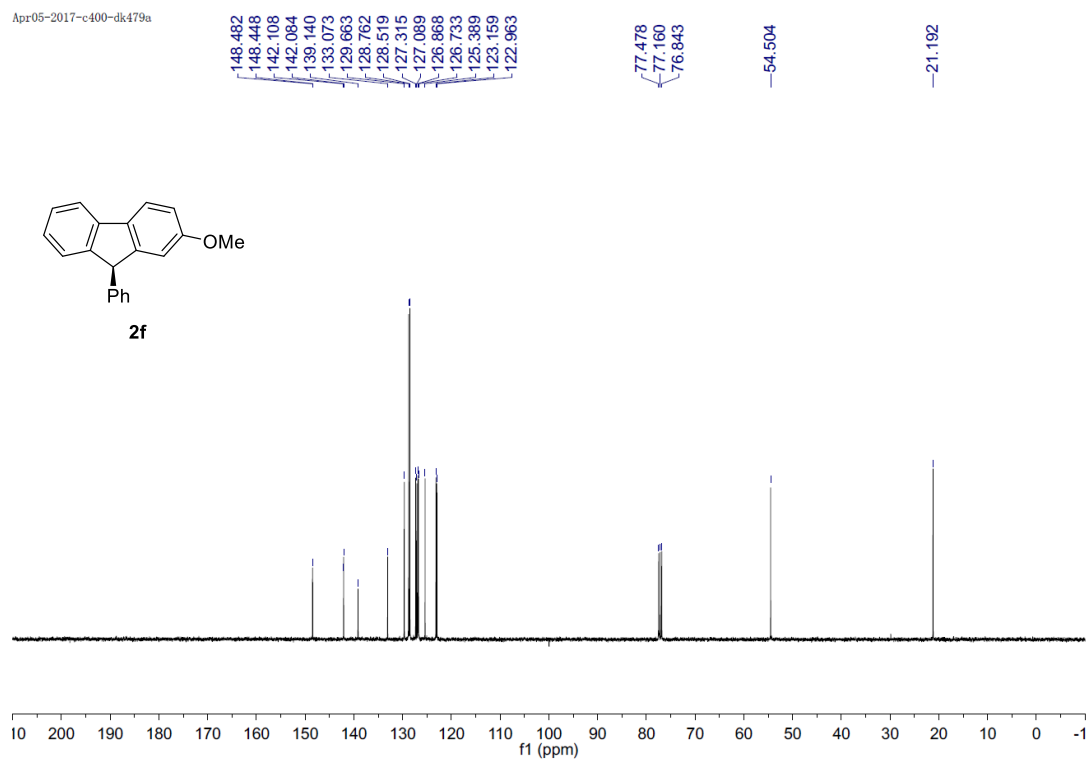

Supplementary Figure 15.  $^{13}\text{C NMR}$  (100 MHz,  $\text{CDCl}_3$ ) spectrum for **2f**

Apr10-2017-h400-dk488b

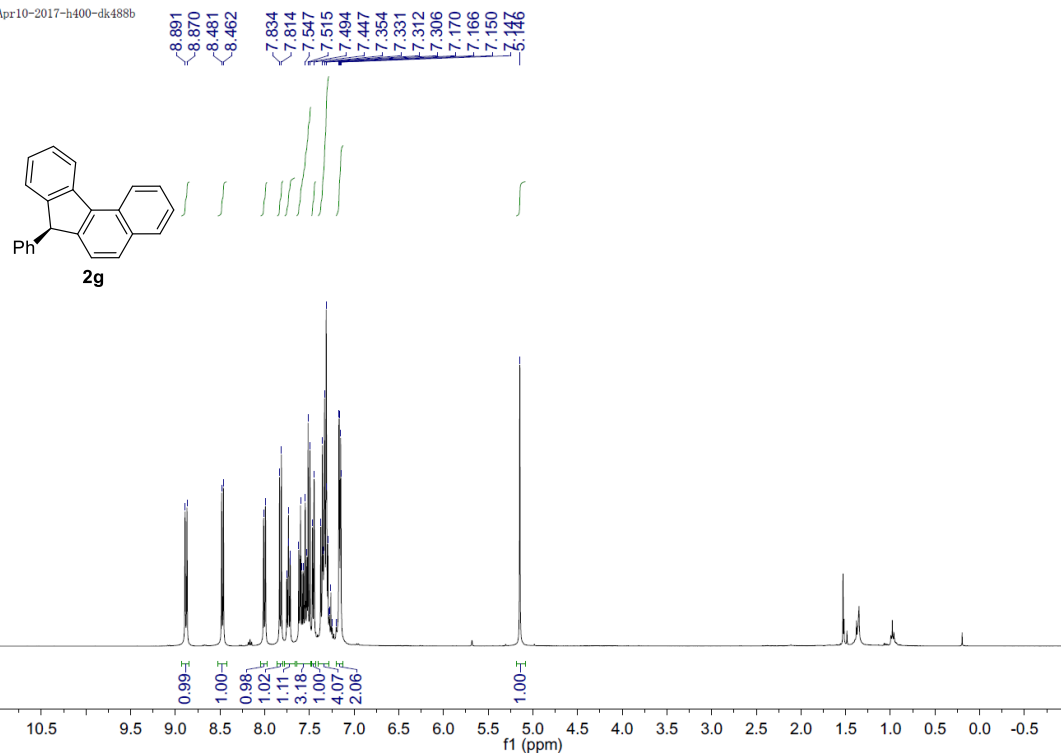

Supplementary Figure 16. <sup>1</sup>H NMR (400 MHz, CDCl<sub>3</sub>) spectrum for 2g

Apr10-2017-c400-dk488b

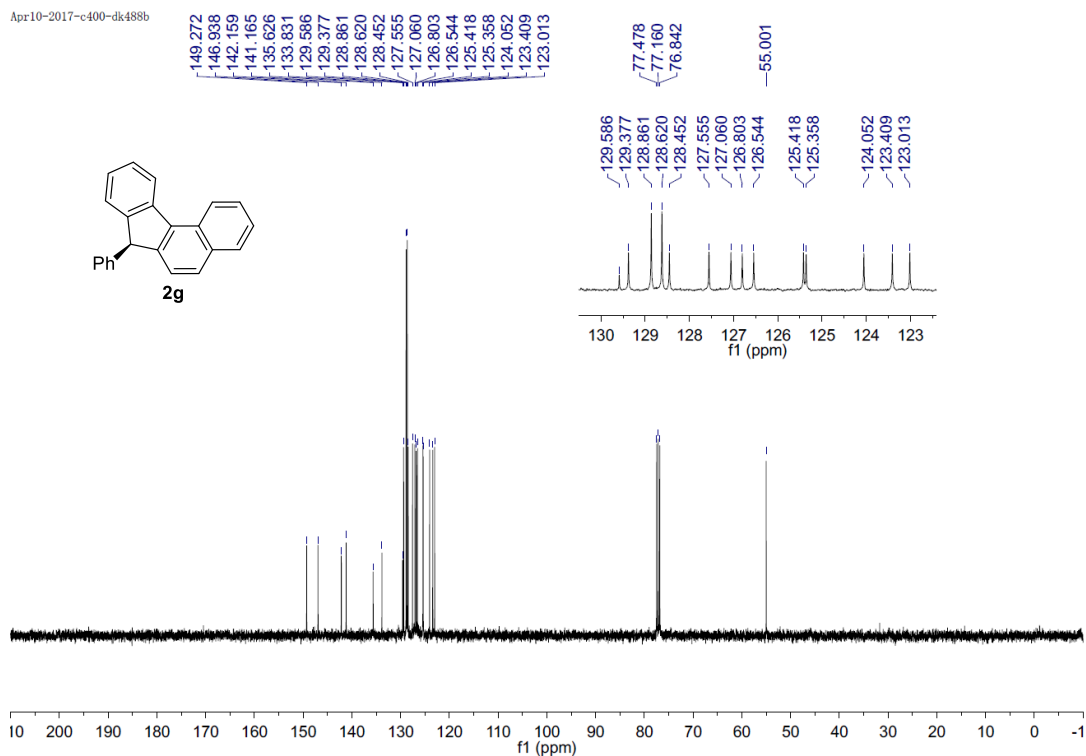

Supplementary Figure 17. <sup>13</sup>C NMR (100 MHz, CDCl<sub>3</sub>) spectrum for 2g

Apr-28-2017-h400-dk-518

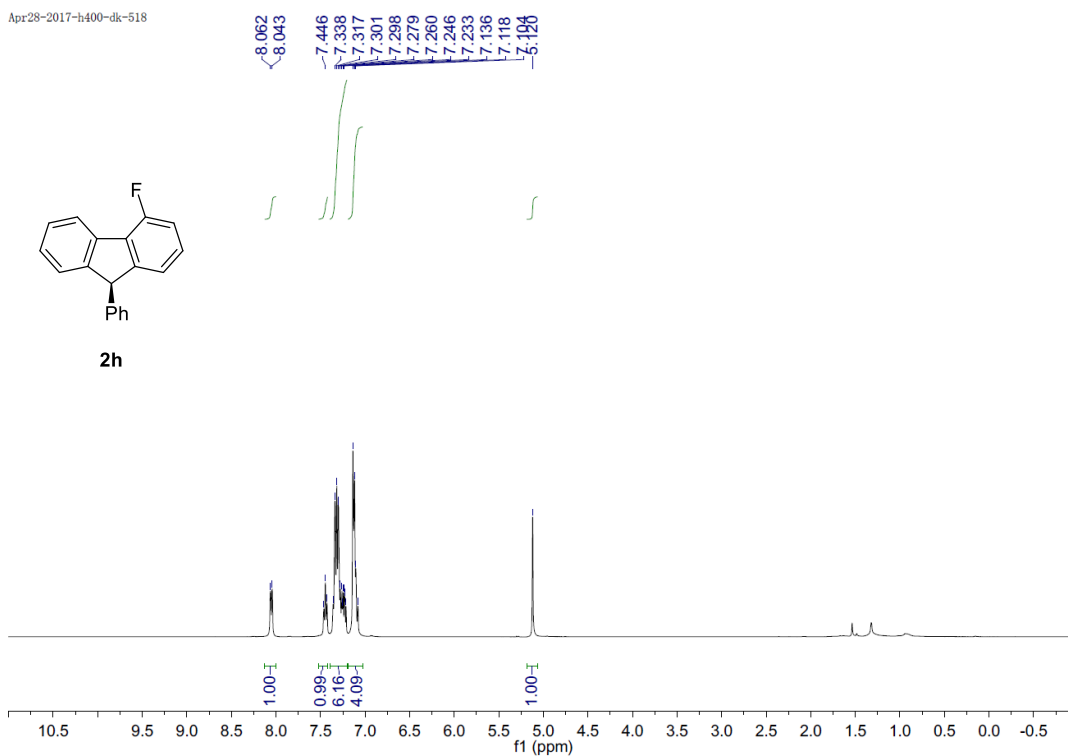

Supplementary Figure 18. <sup>1</sup>H NMR (400 MHz, CDCl<sub>3</sub>) spectrum for 2h

Apr-28-2017-c400-dk-518

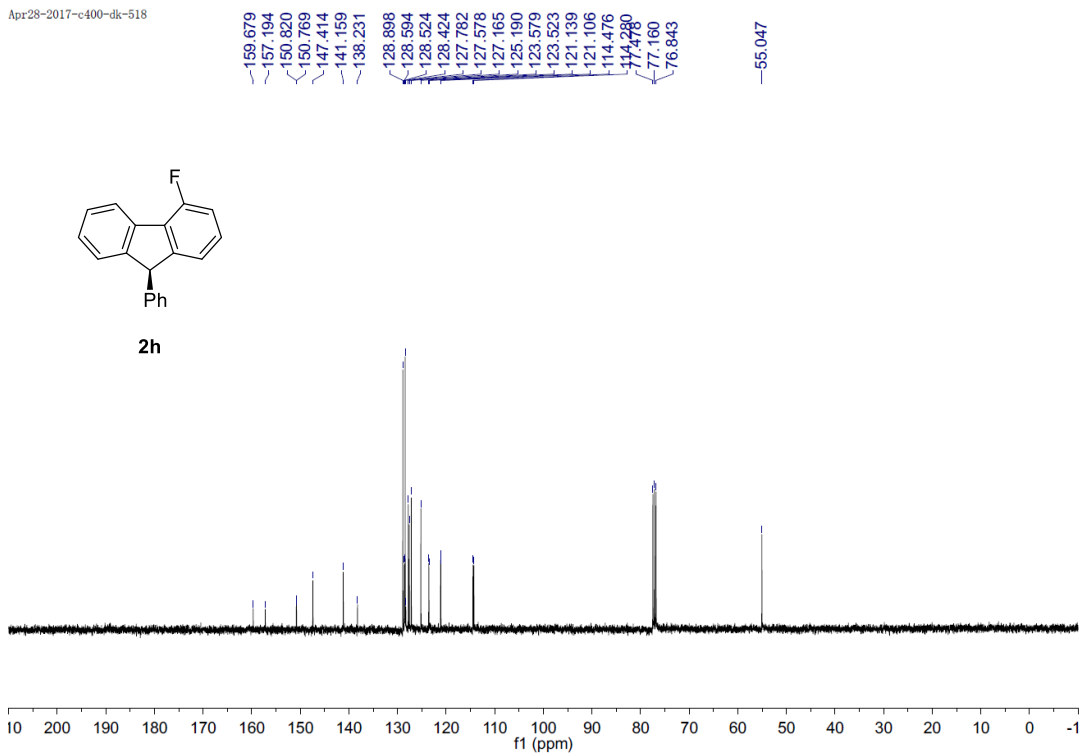

Supplementary Figure 19. <sup>13</sup>C NMR (100 MHz, CDCl<sub>3</sub>) spectrum for 2h

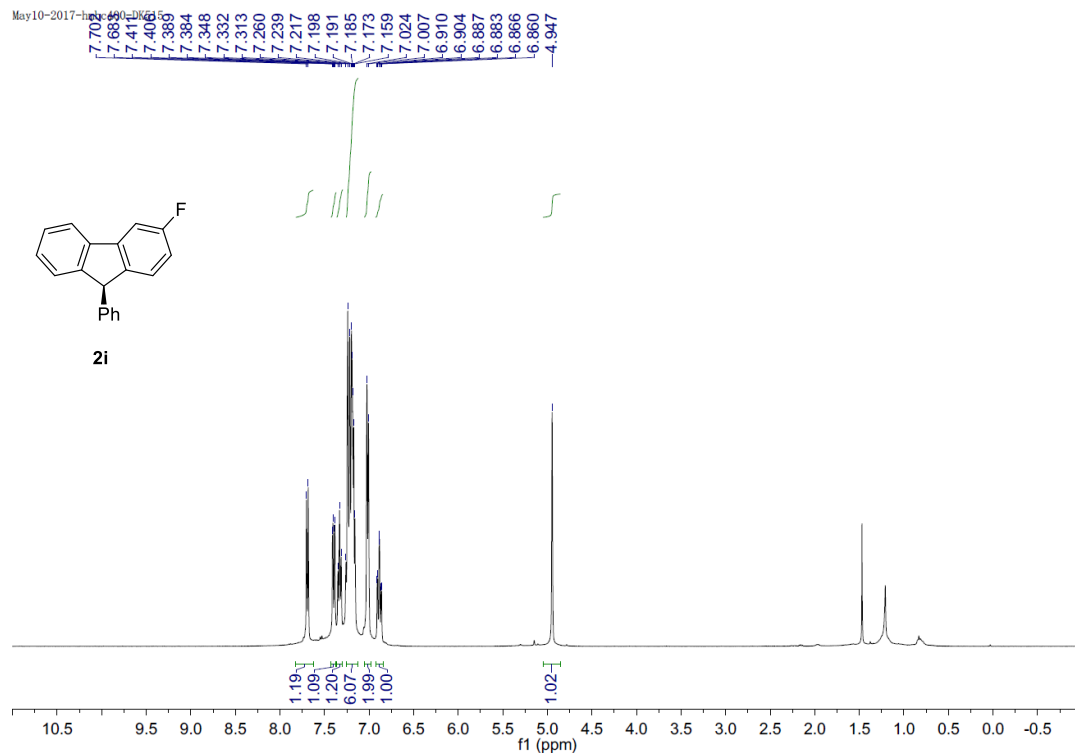

Supplementary Figure 20.  $^1\text{H}$  NMR (400 MHz,  $\text{CDCl}_3$ ) spectrum for **2i**

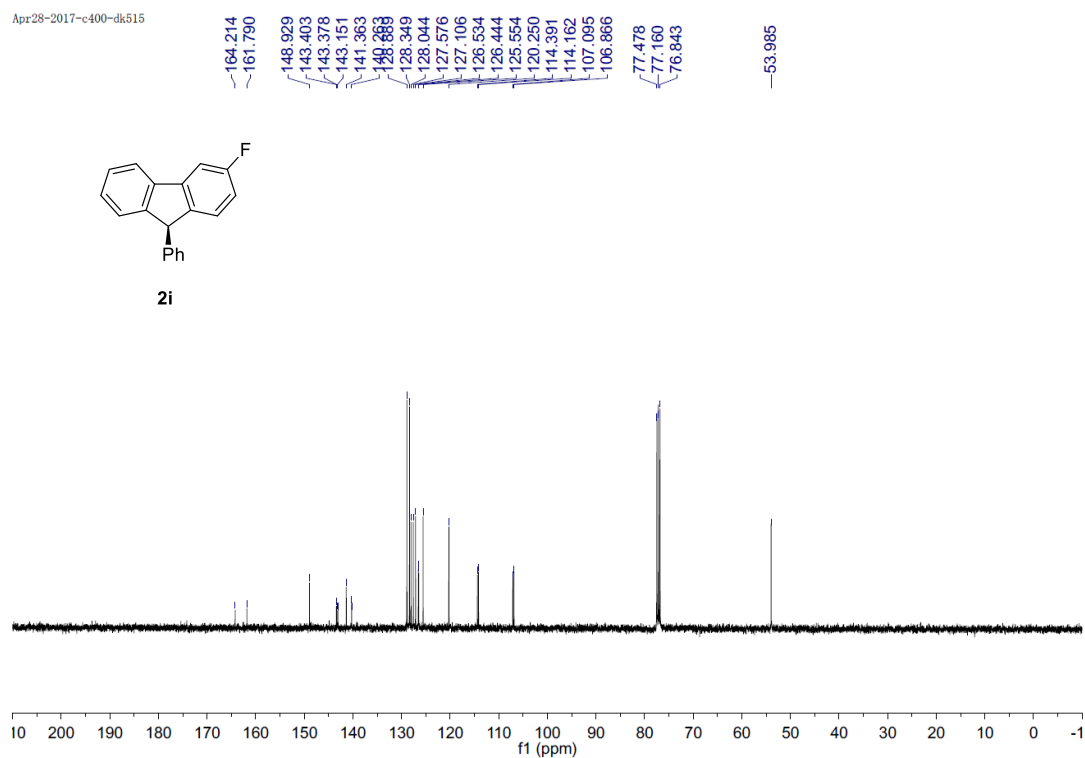

Supplementary Figure 21.  $^{13}\text{C}$  NMR (100 MHz,  $\text{CDCl}_3$ ) spectrum for **2i**

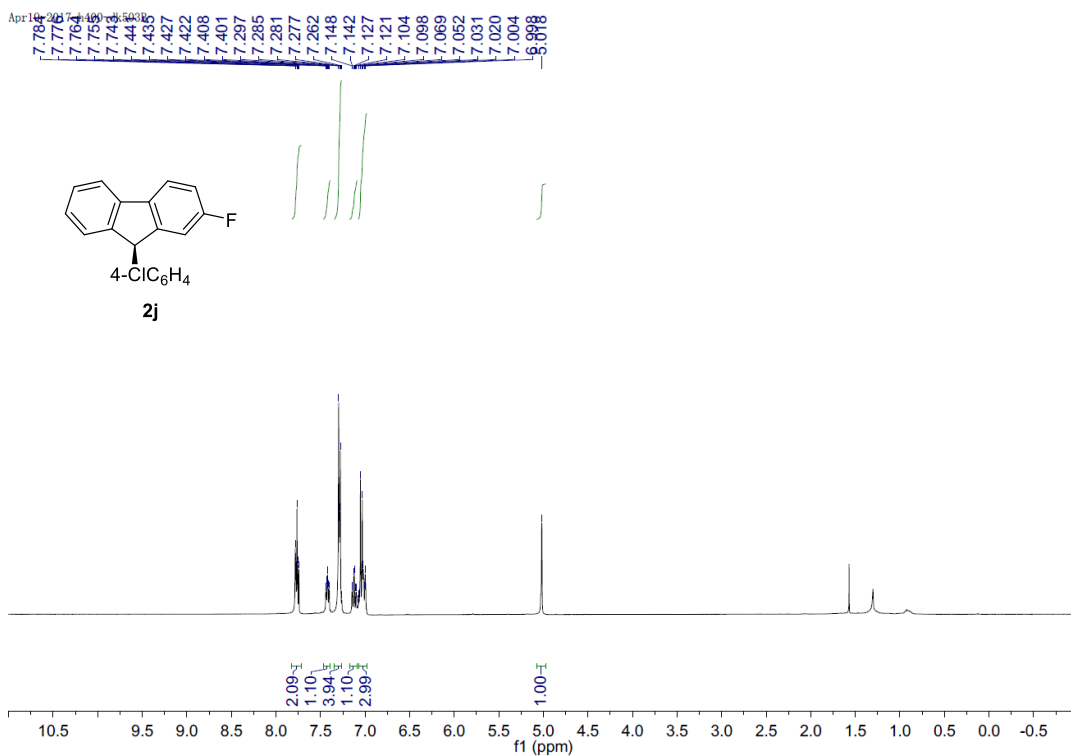

Supplementary Figure 22. <sup>1</sup>H NMR (400 MHz, CDCl<sub>3</sub>) spectrum for **2j**

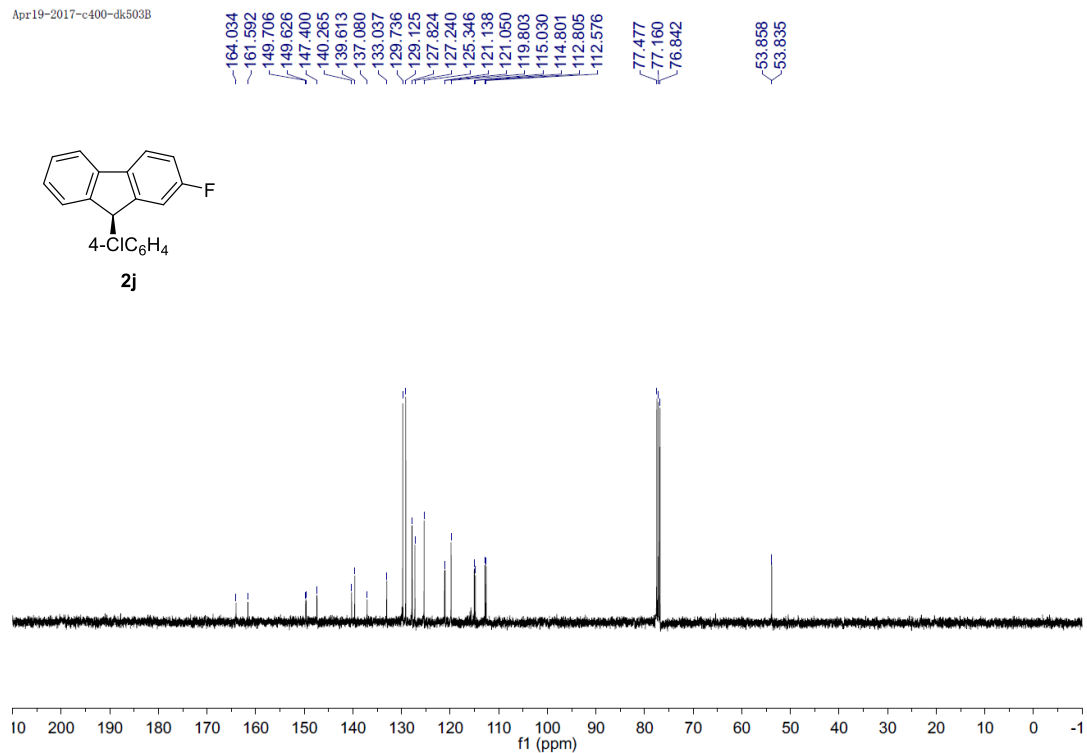

Supplementary Figure 23. <sup>13</sup>C NMR (100 MHz, CDCl<sub>3</sub>) spectrum for **2j**



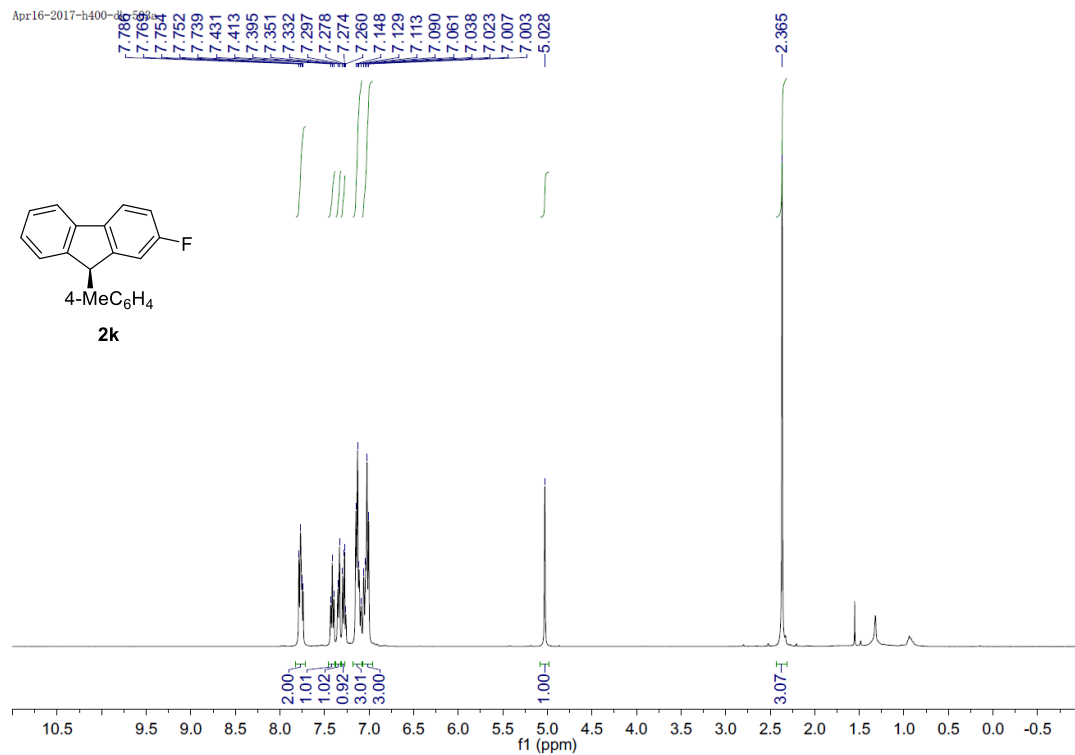

Supplementary Figure 24.  $^1\text{H}$  NMR (400 MHz,  $\text{CDCl}_3$ ) spectrum for **2k**

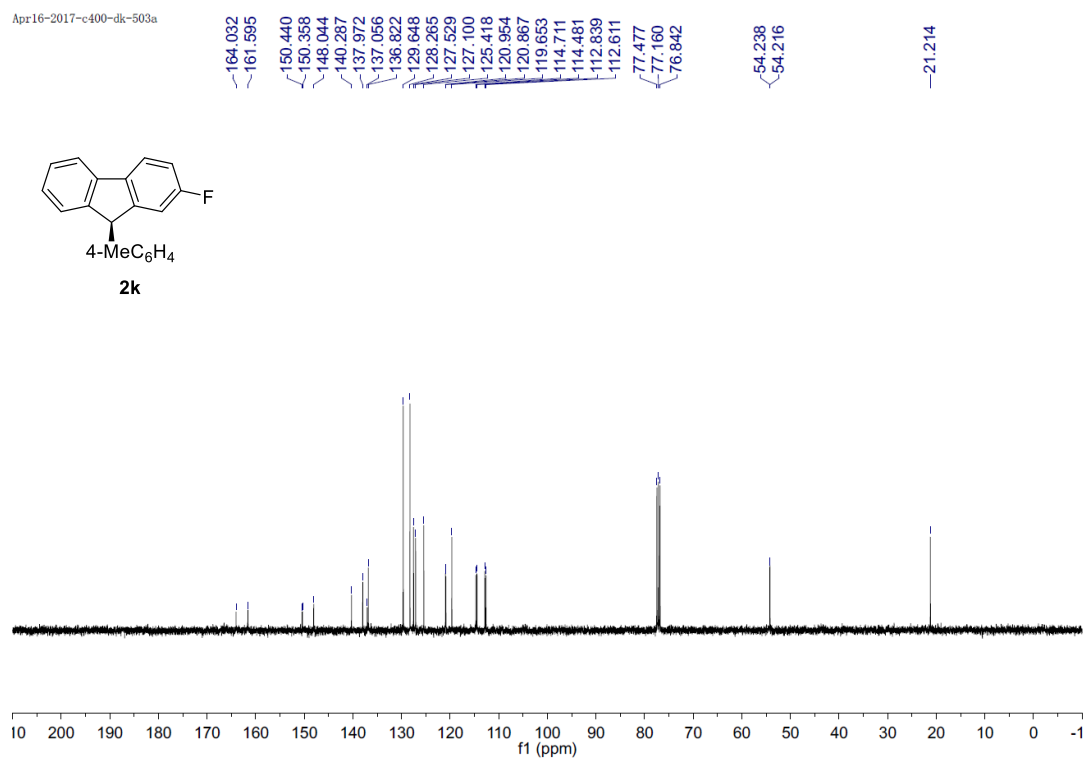

Supplementary Figure 25.  $^{13}\text{C}$  NMR (100 MHz,  $\text{CDCl}_3$ ) spectrum for **2k**

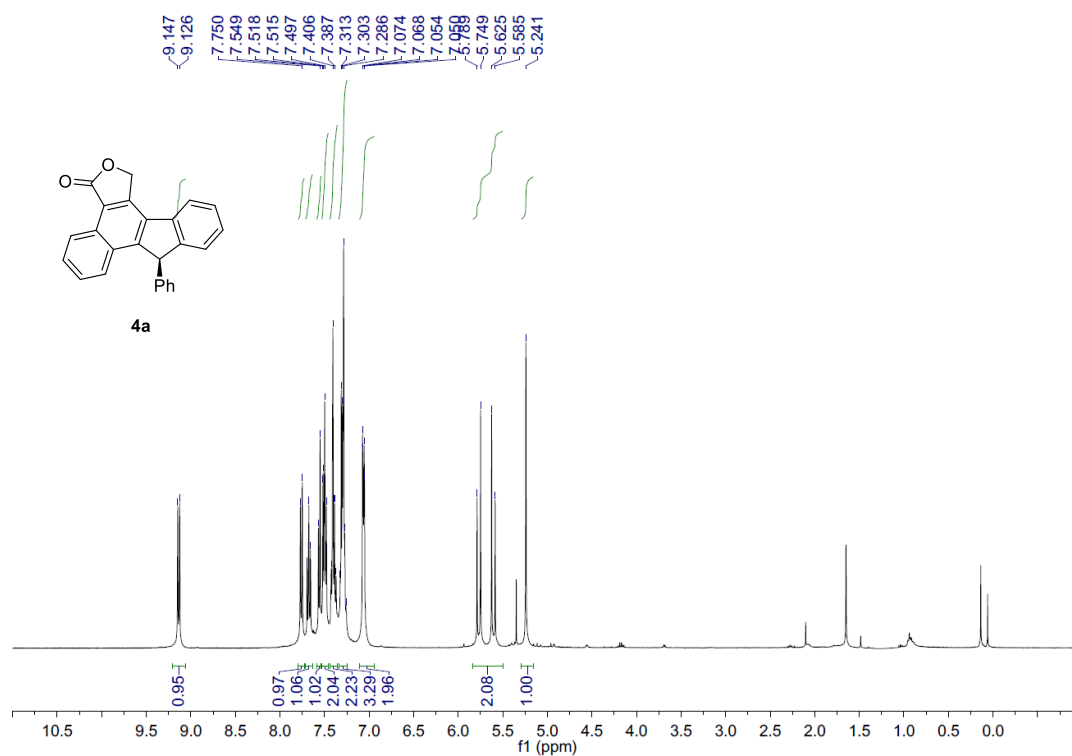

Supplementary Figure 26. <sup>1</sup>H NMR (400 MHz, CDCl<sub>3</sub>) spectrum for 4a

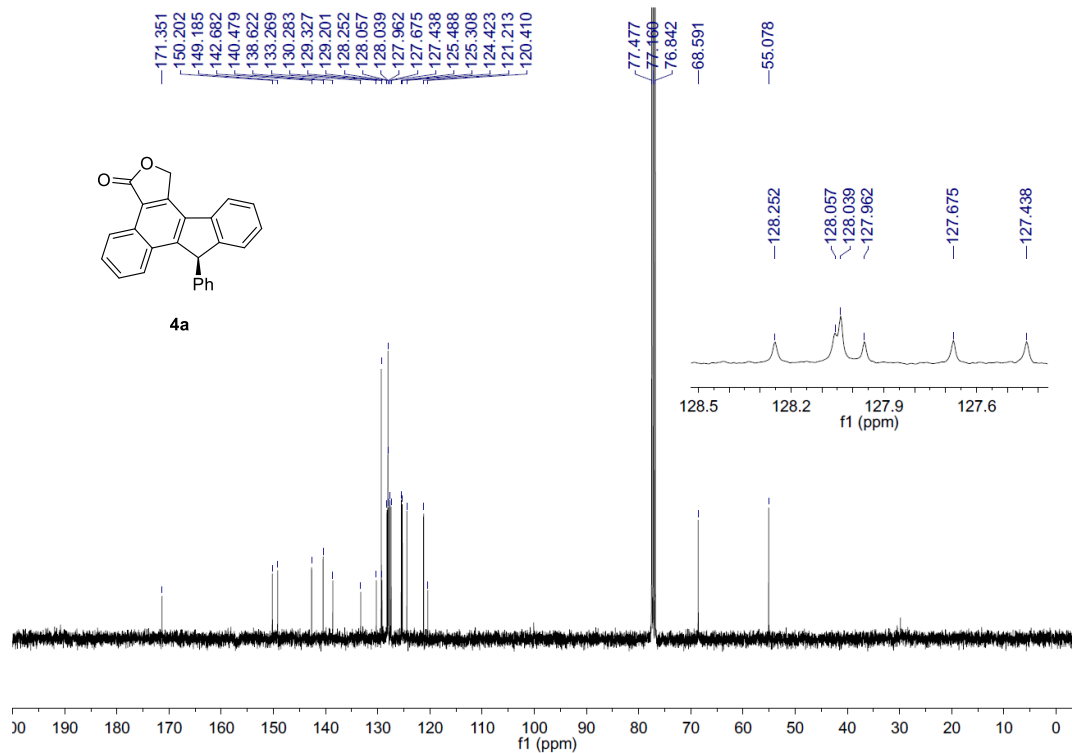

Supplementary Figure 27. <sup>13</sup>C NMR (100 MHz, CDCl<sub>3</sub>) spectrum for 4a

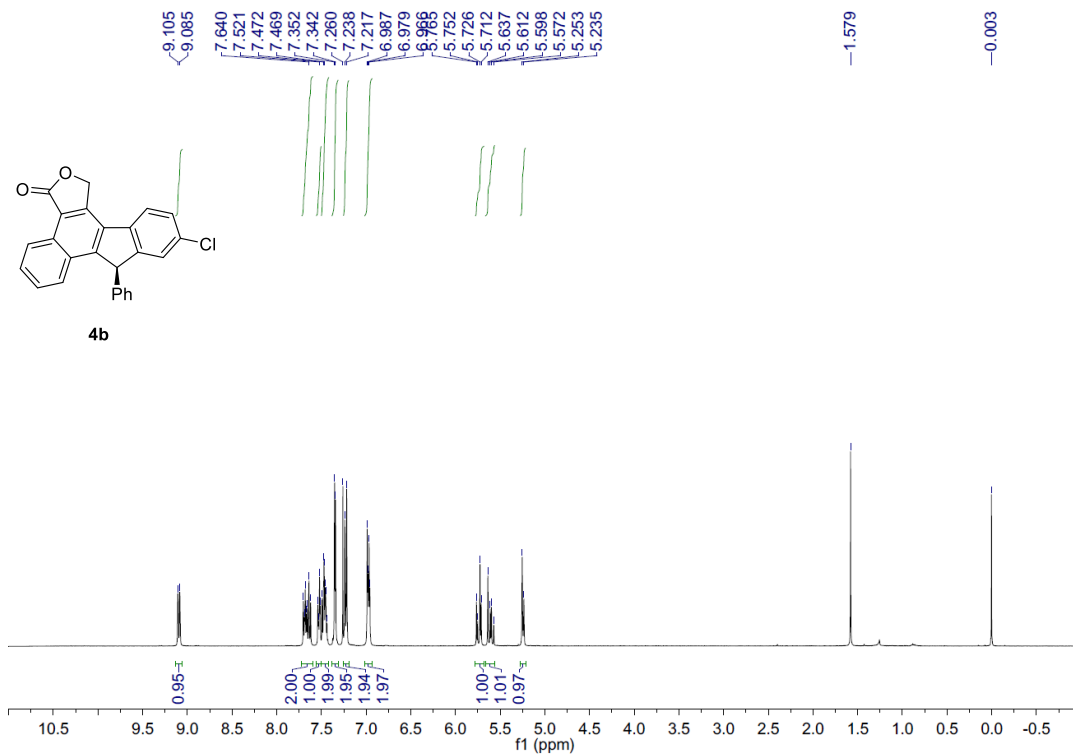

**Supplementary Figure 28. <sup>1</sup>H NMR (400 MHz, CDCl<sub>3</sub>) spectrum for 4b**

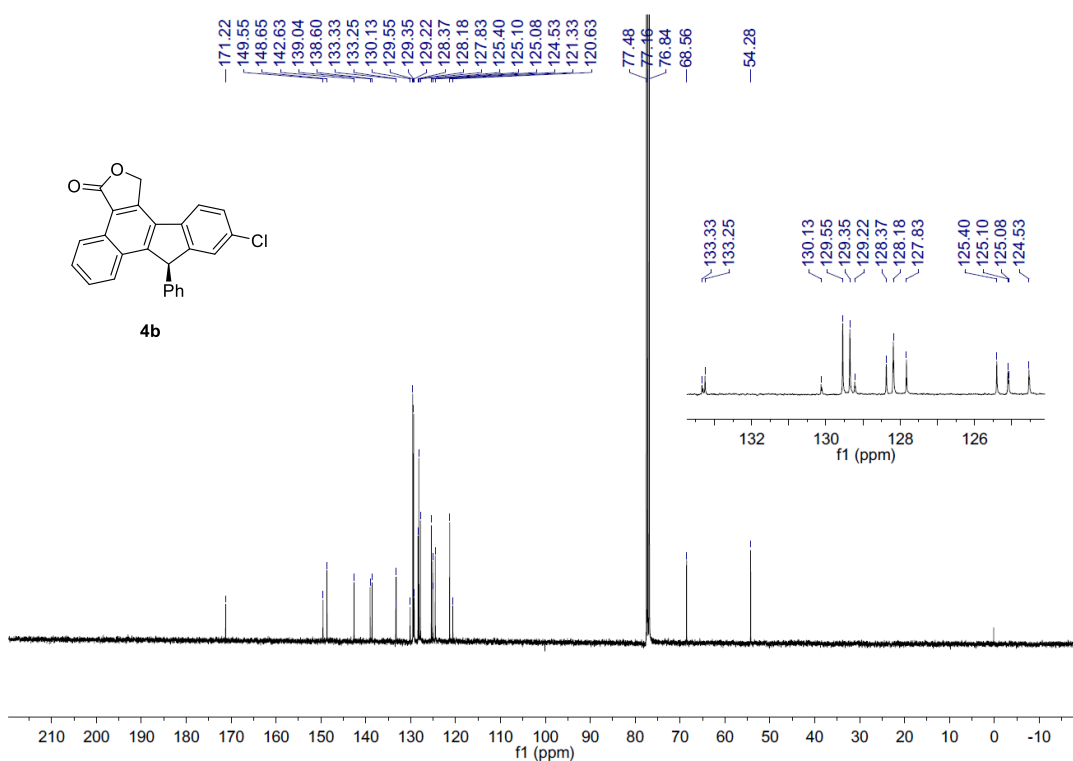

**Supplementary Figure 29. <sup>13</sup>C NMR (100 MHz, CDCl<sub>3</sub>) spectrum for 4b**

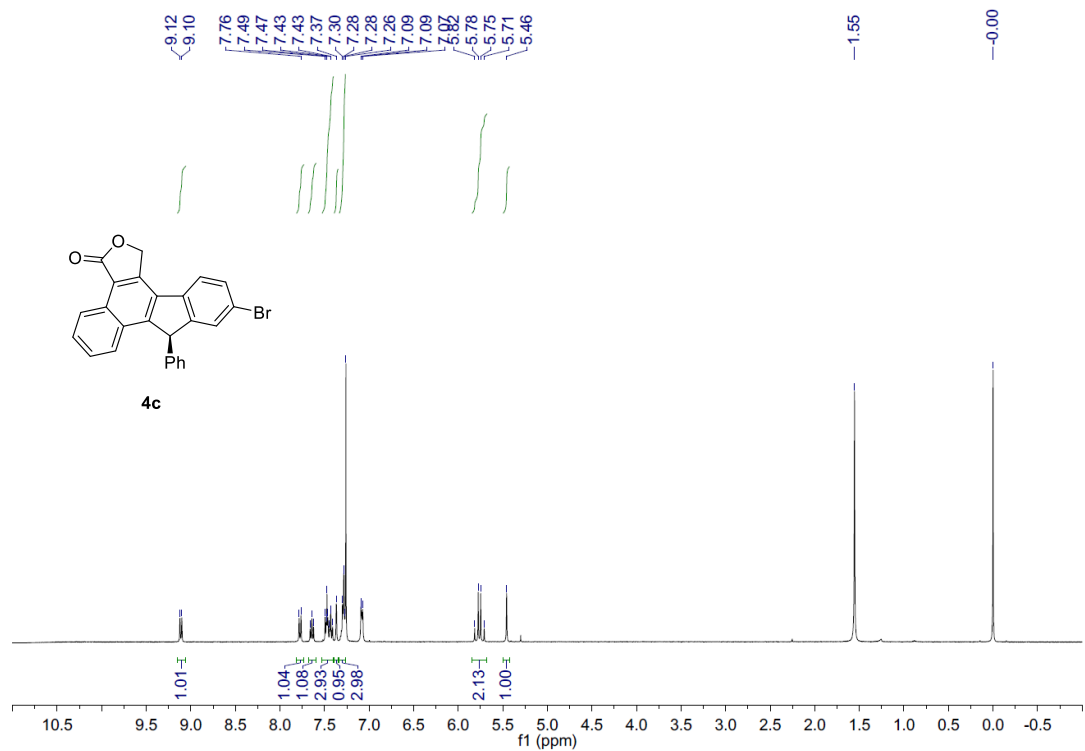

Supplementary Figure 30. <sup>1</sup>H NMR (400 MHz, CDCl<sub>3</sub>) spectrum for **4c**

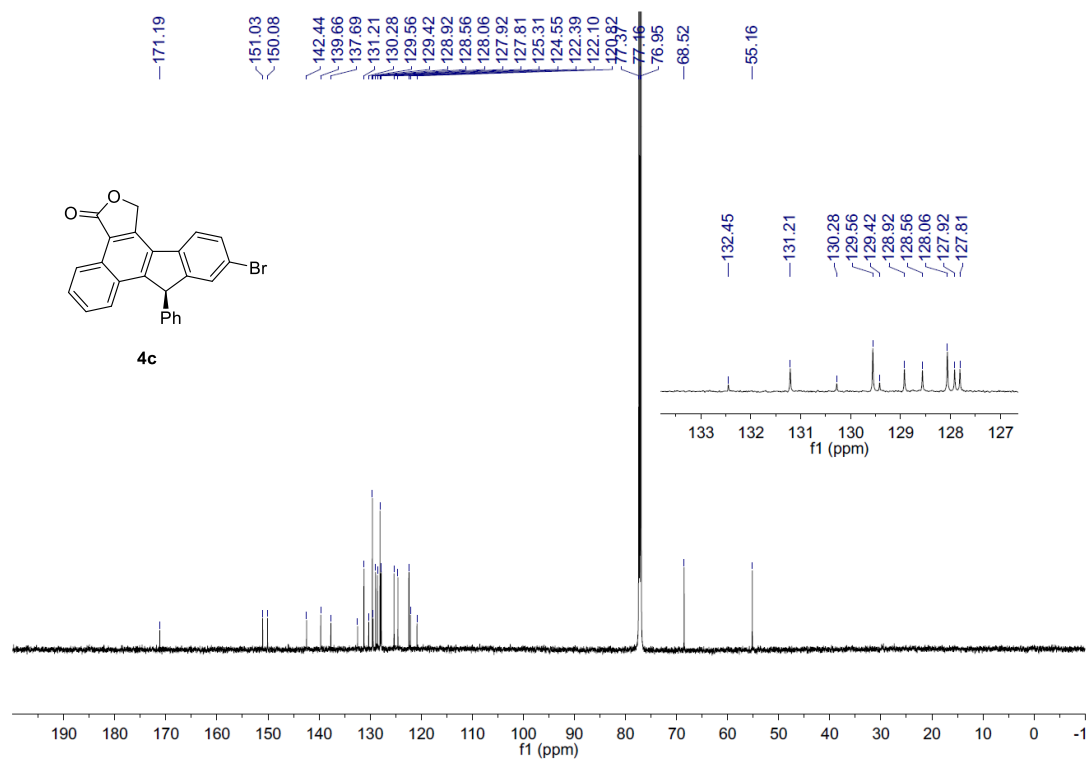

Supplementary Figure 31. <sup>13</sup>C NMR (100 MHz, CDCl<sub>3</sub>) spectrum for **4c**

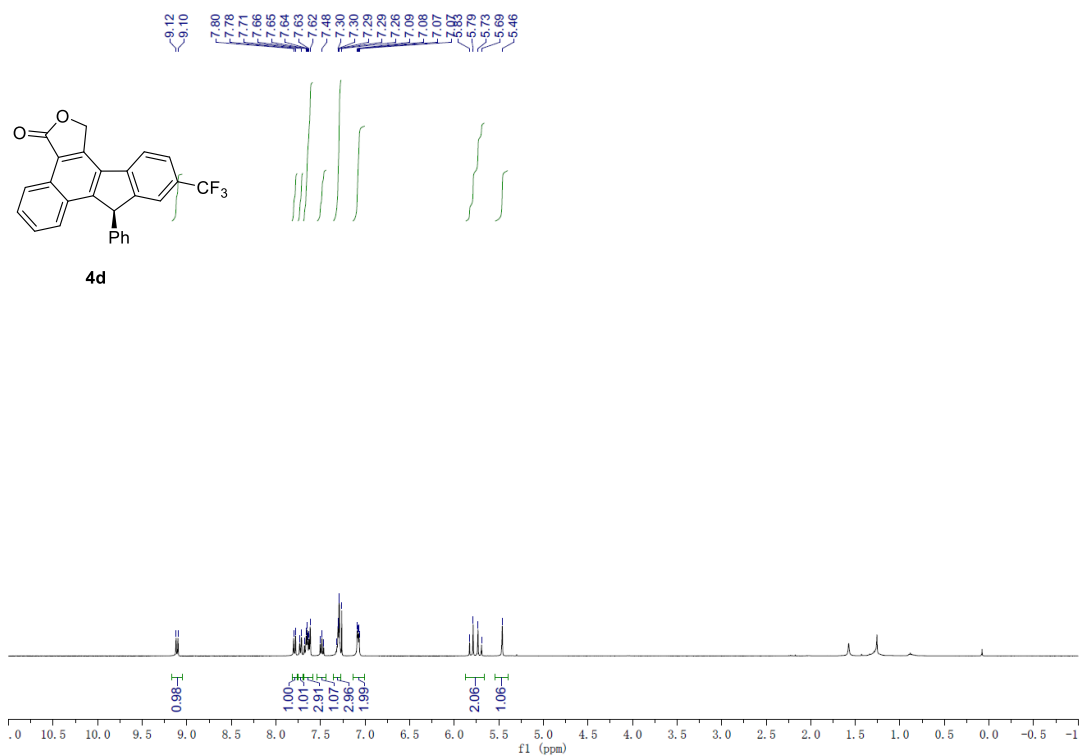

Supplementary Figure 32. <sup>1</sup>H NMR (400 MHz, CDCl<sub>3</sub>) spectrum for 4d

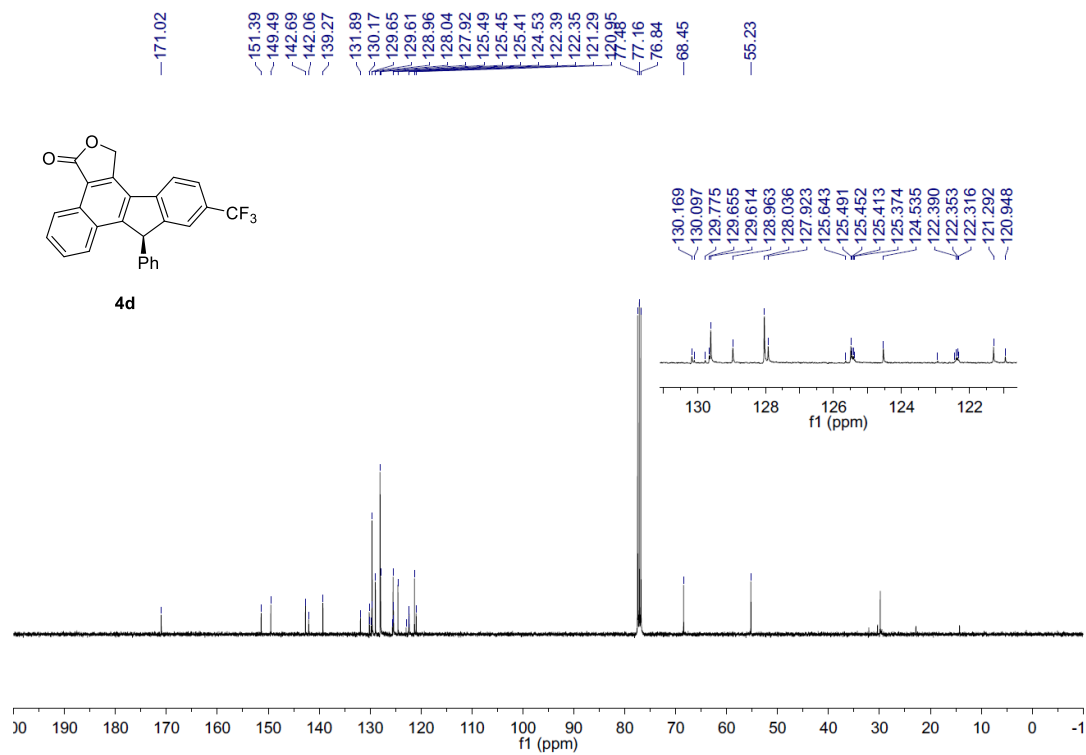

Supplementary Figure 33. <sup>13</sup>C NMR (100 MHz, CDCl<sub>3</sub>) spectrum for 4d

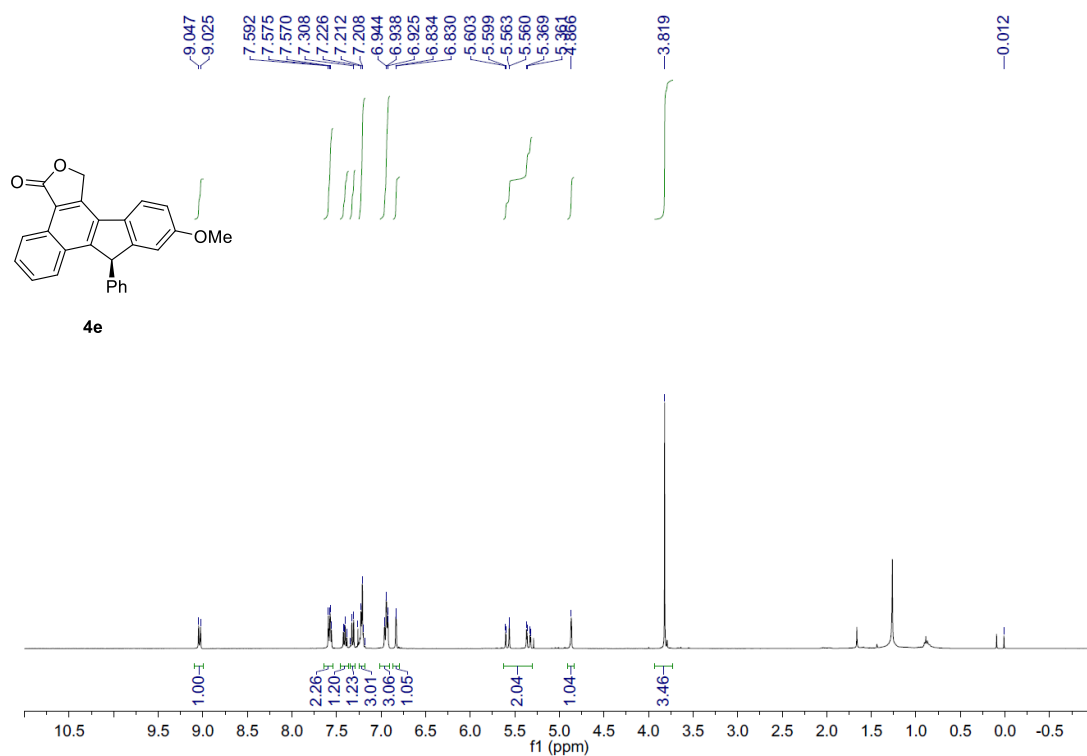

Supplementary Figure 34. <sup>1</sup>H NMR (400 MHz, CDCl<sub>3</sub>) spectrum for 4e

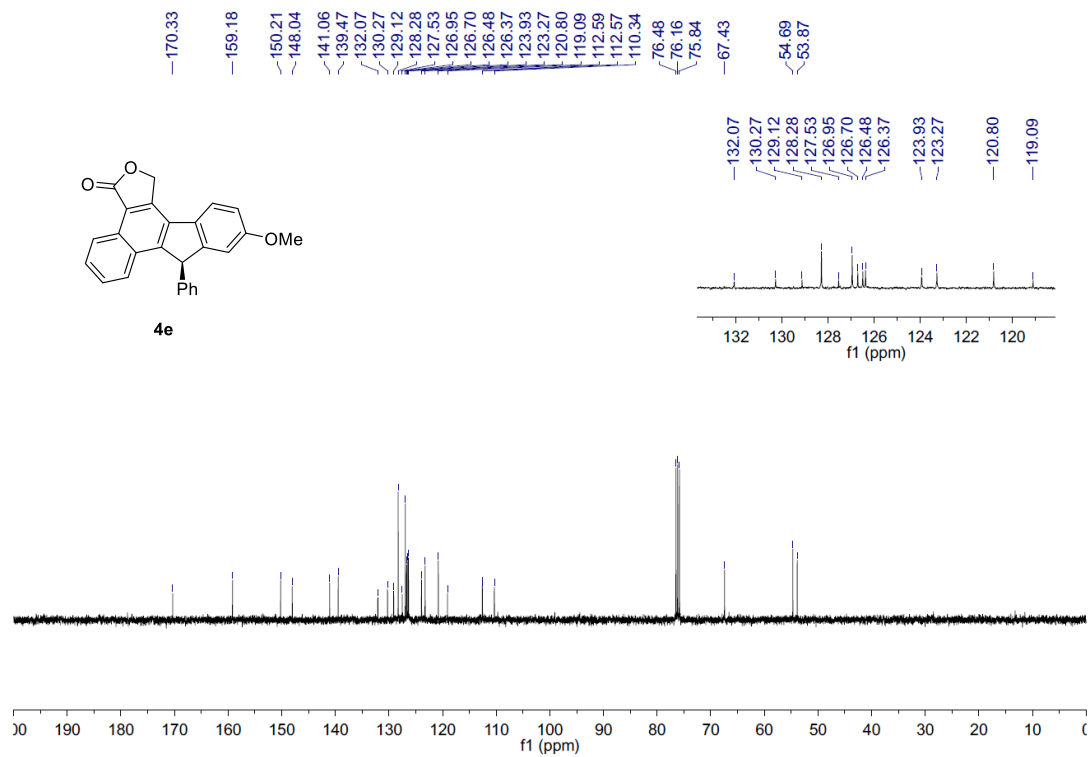

Supplementary Figure 35. <sup>13</sup>C NMR (100 MHz, CDCl<sub>3</sub>) spectrum for 4e

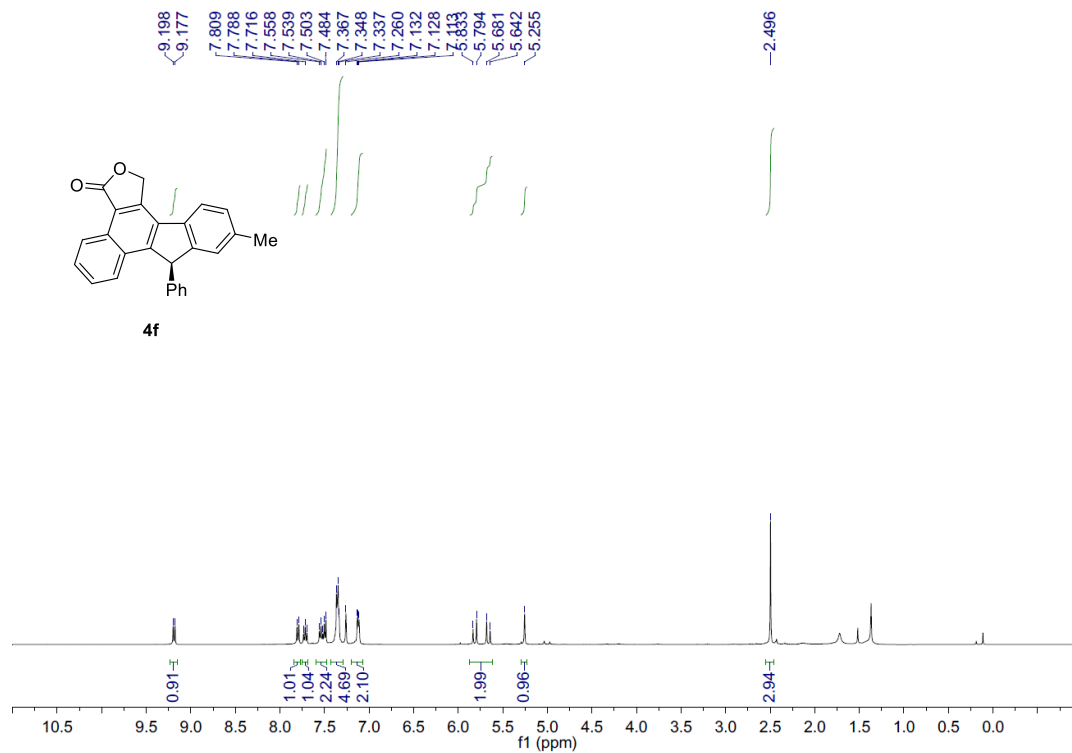

Supplementary Figure 36. <sup>1</sup>H NMR (400 MHz, CDCl<sub>3</sub>) spectrum for **4f**

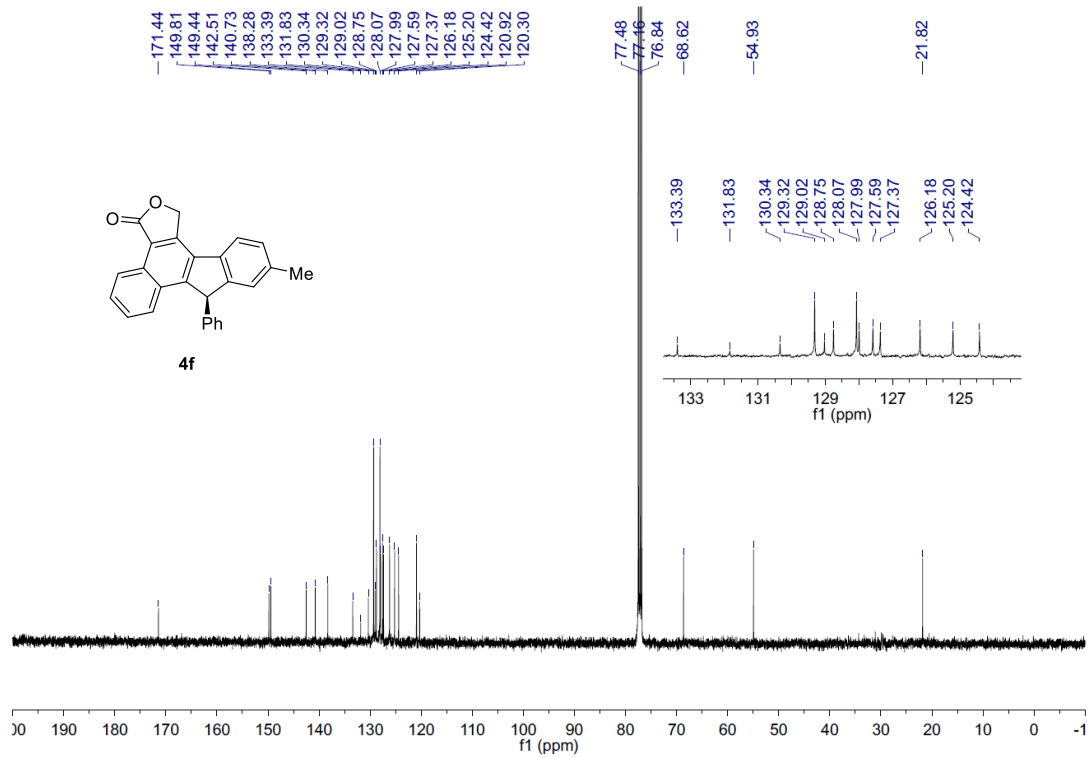

Supplementary Figure 37. <sup>13</sup>C NMR (100 MHz, CDCl<sub>3</sub>) spectrum for **4f**

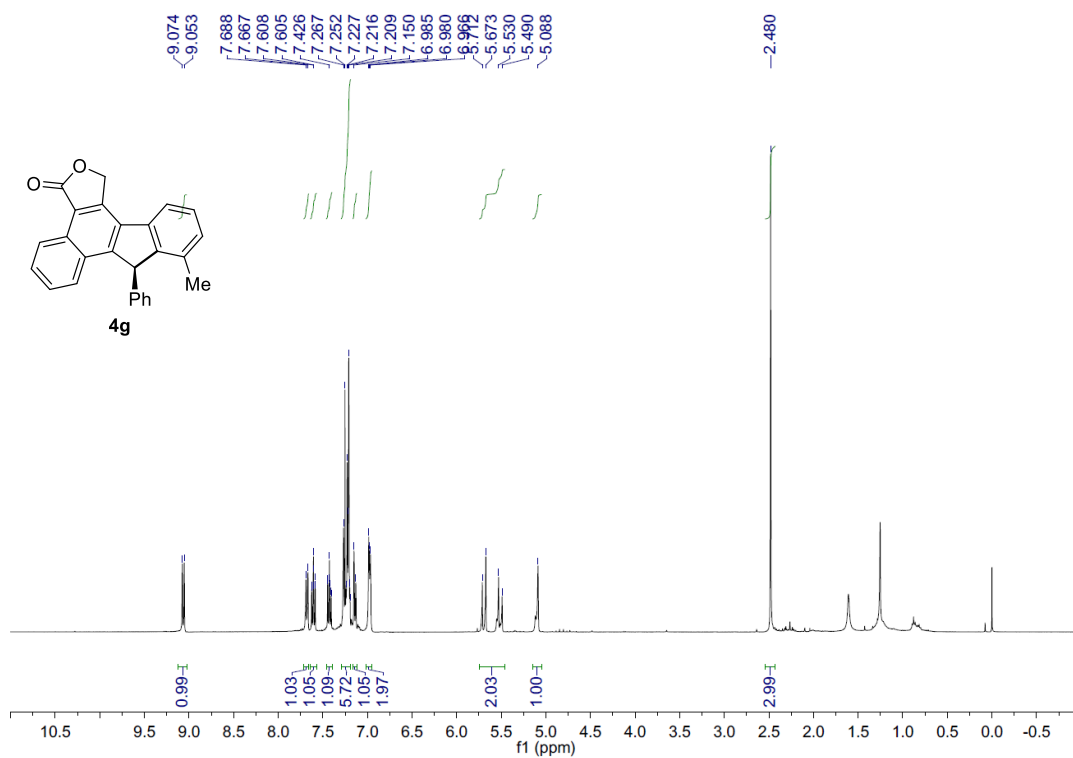

Supplementary Figure 38. <sup>1</sup>H NMR (400 MHz, CDCl<sub>3</sub>) spectrum for 4g

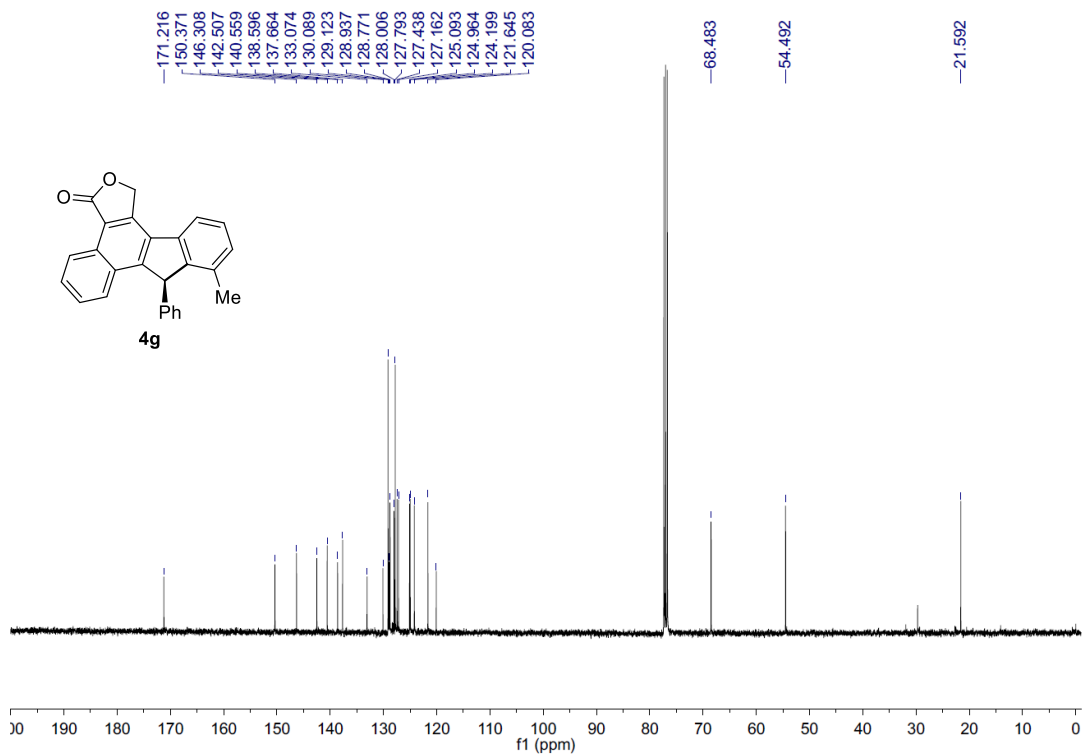

Supplementary Figure 39. <sup>13</sup>C NMR (100 MHz, CDCl<sub>3</sub>) spectrum for 4g



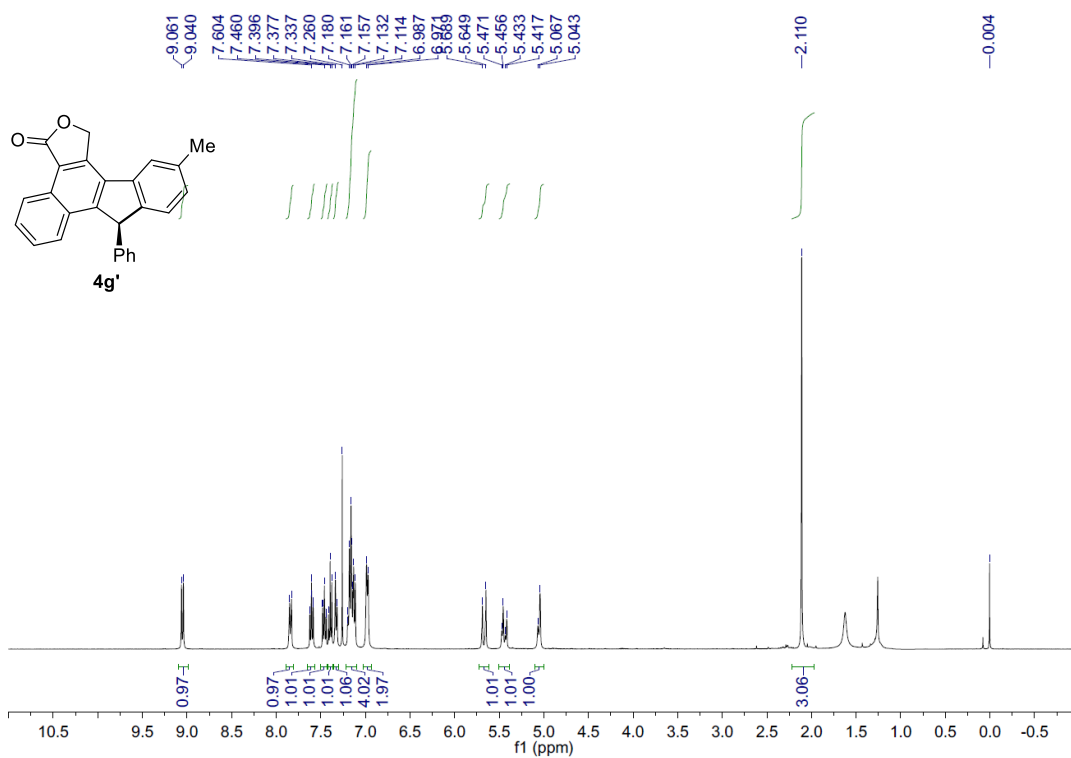

Supplementary Figure 40. <sup>1</sup>H NMR (400 MHz, CDCl<sub>3</sub>) spectrum for 4g'

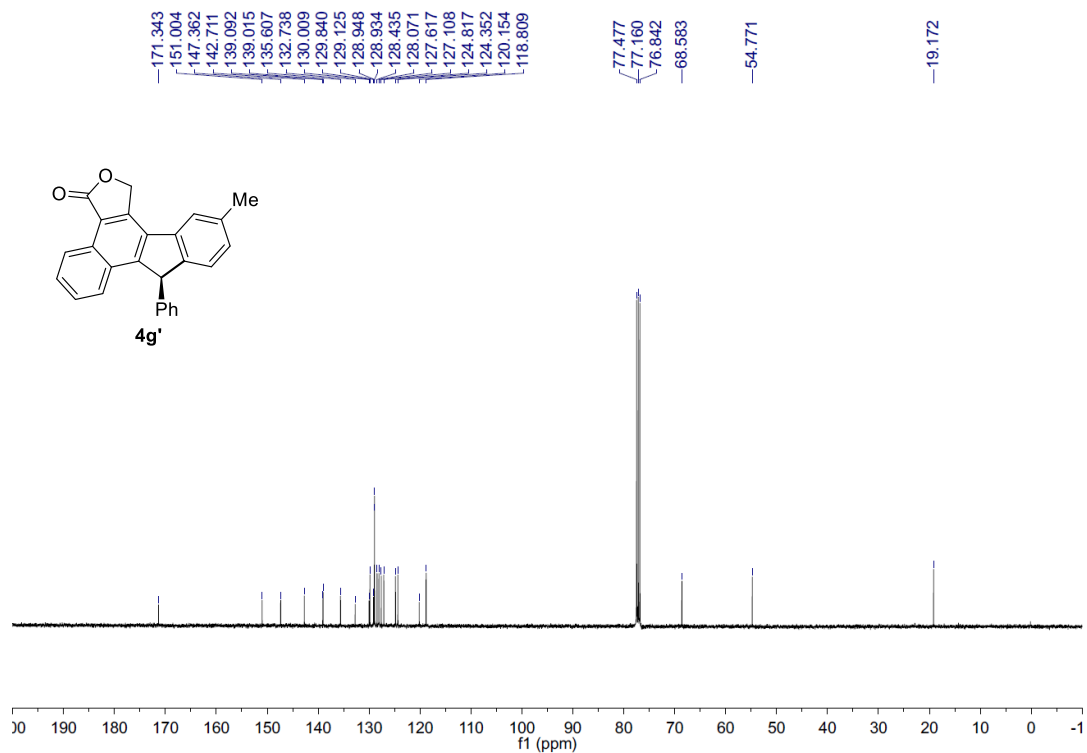

Supplementary Figure 41. <sup>13</sup>C NMR (100 MHz, CDCl<sub>3</sub>) spectrum for 4g'

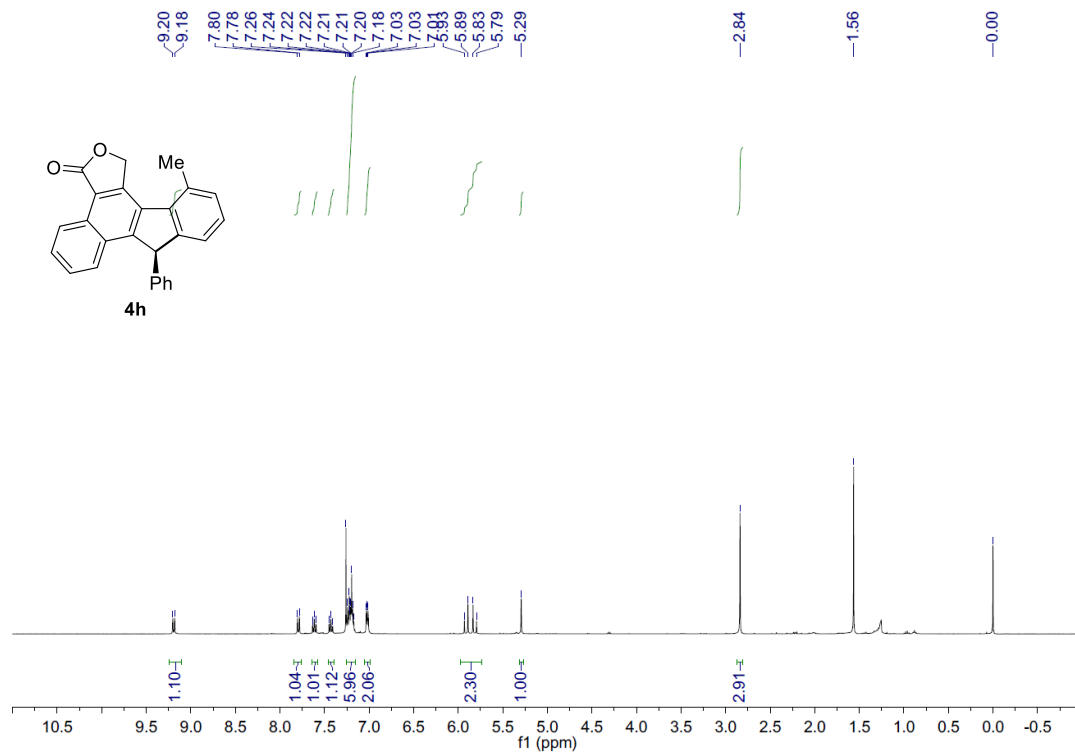

Supplementary Figure 42. <sup>1</sup>H NMR (400 MHz, CDCl<sub>3</sub>) spectrum for 4h

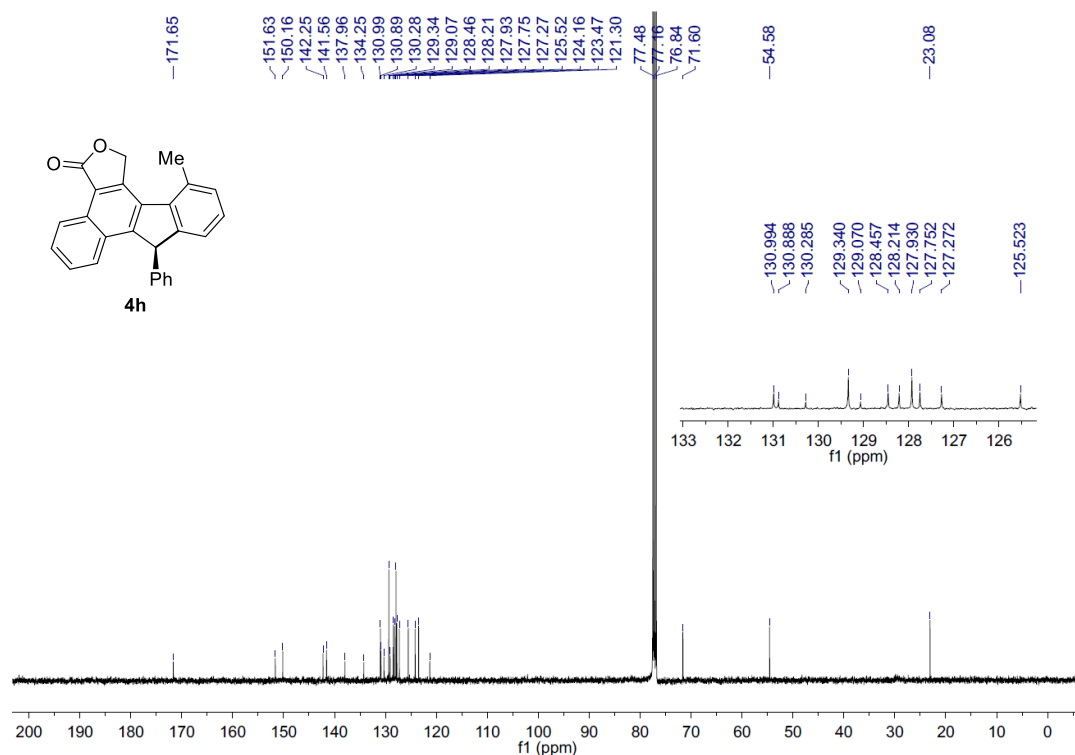

Supplementary Figure 43. <sup>13</sup>C NMR (100 MHz, CDCl<sub>3</sub>) spectrum for 4h

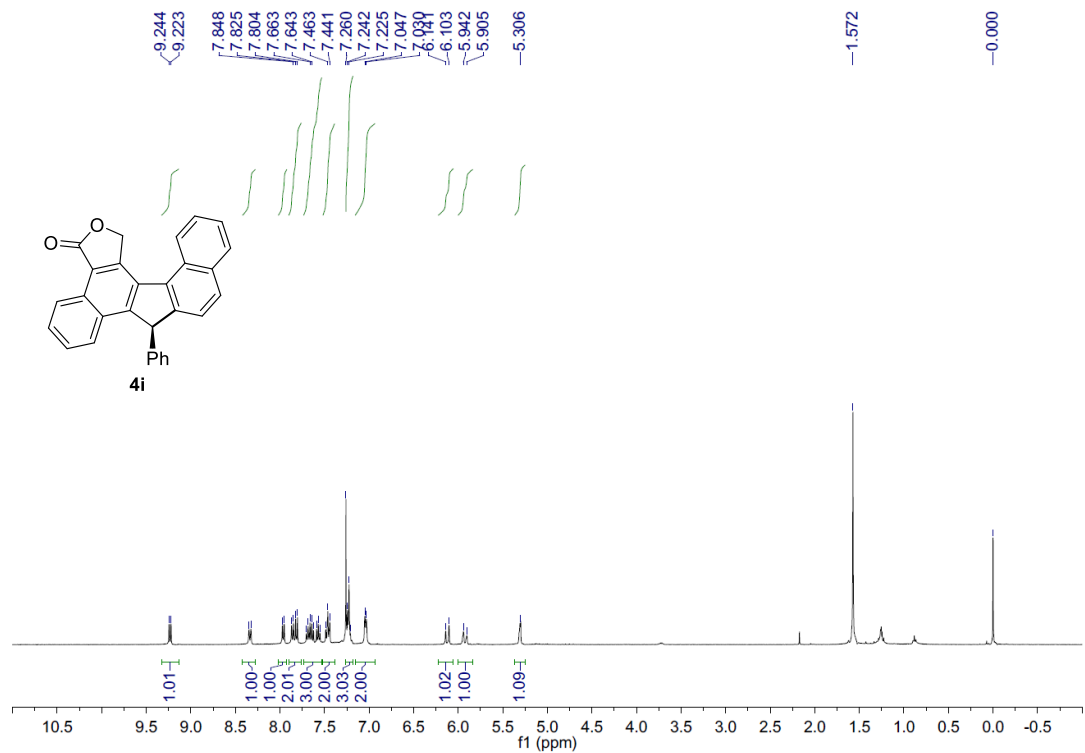

Supplementary Figure 44. <sup>1</sup>H NMR (400 MHz, CDCl<sub>3</sub>) spectrum for 4i

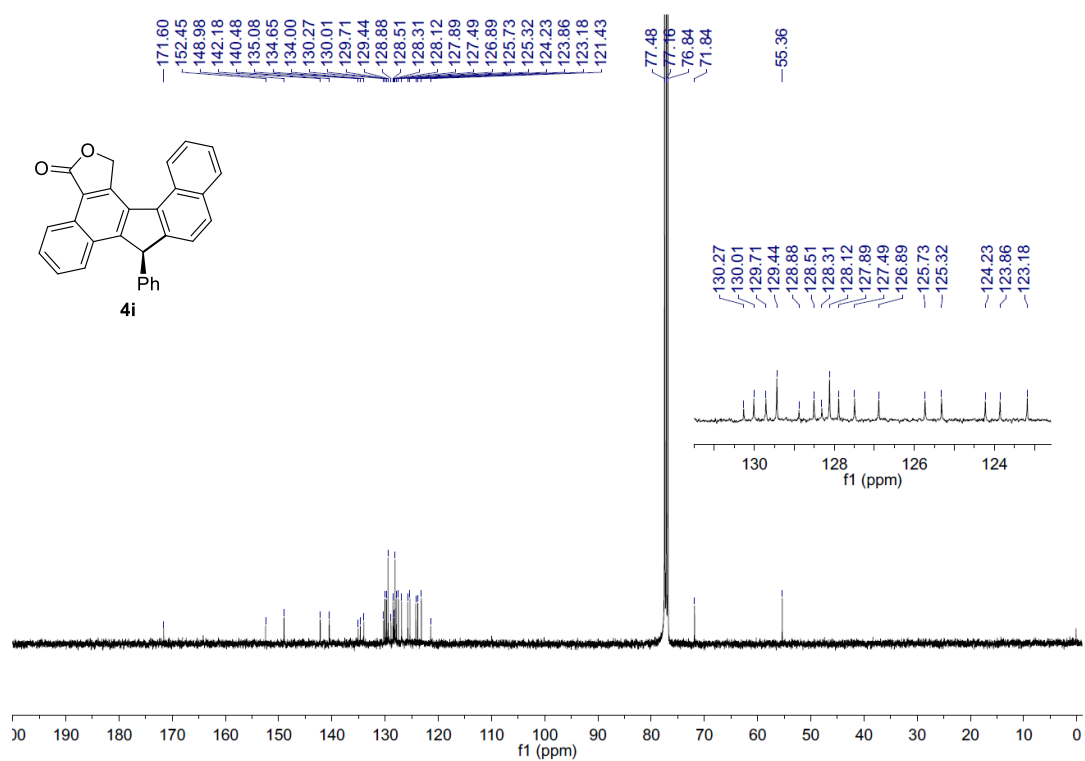

Supplementary Figure 45. <sup>13</sup>C NMR (100 MHz, CDCl<sub>3</sub>) spectrum for 4i



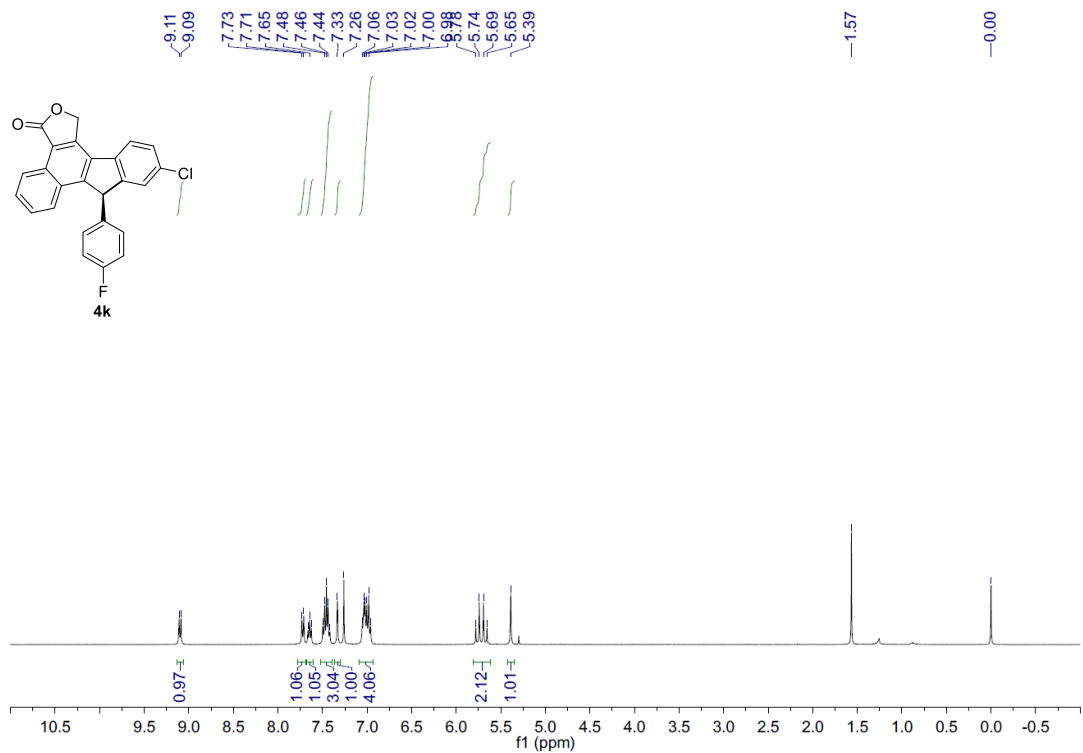

Supplementary Figure 48. <sup>1</sup>H NMR (400 MHz, CDCl<sub>3</sub>) spectrum for 4k

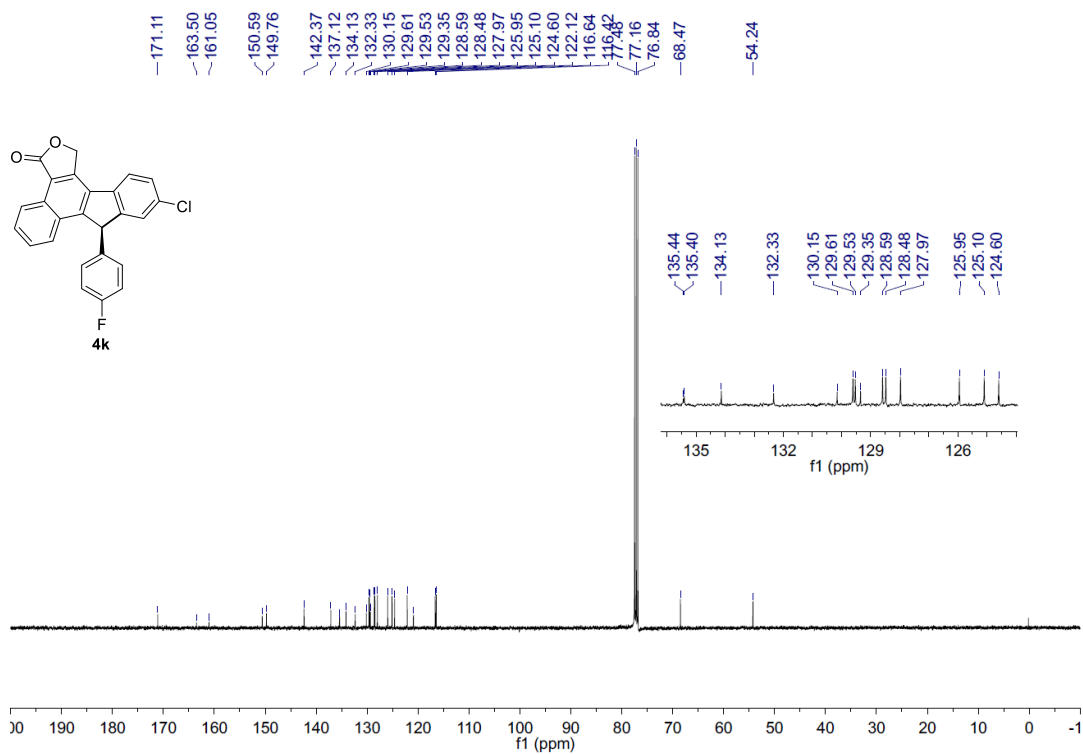

Supplementary Figure 49. <sup>13</sup>C NMR (100 MHz, CDCl<sub>3</sub>) spectrum for 4k

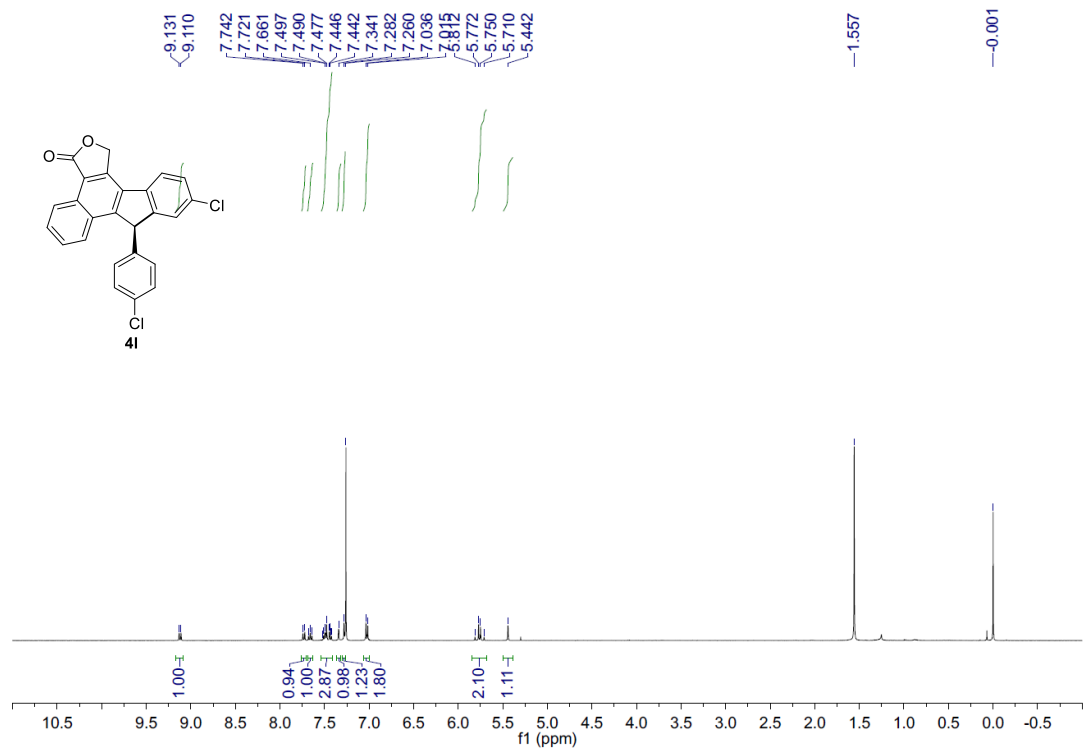

Supplementary Figure 50. <sup>1</sup>H NMR (600 MHz, CDCl<sub>3</sub>) spectrum for 4l

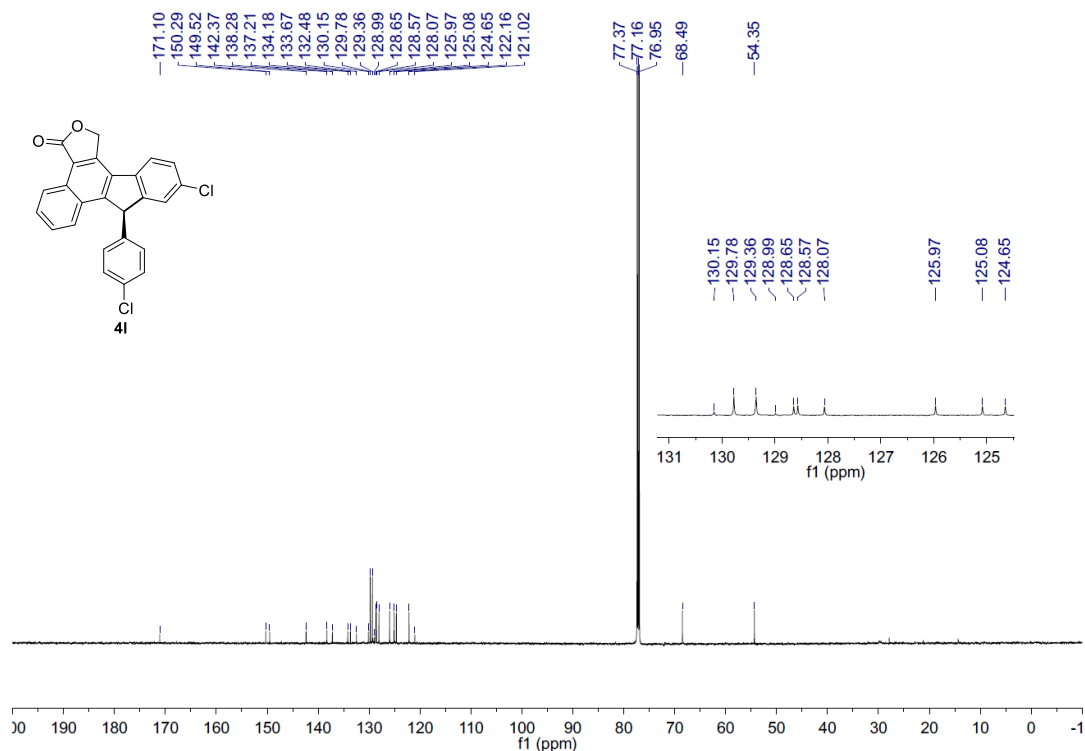

Supplementary Figure 51. <sup>13</sup>C NMR (150 MHz, CDCl<sub>3</sub>) spectrum for 4l

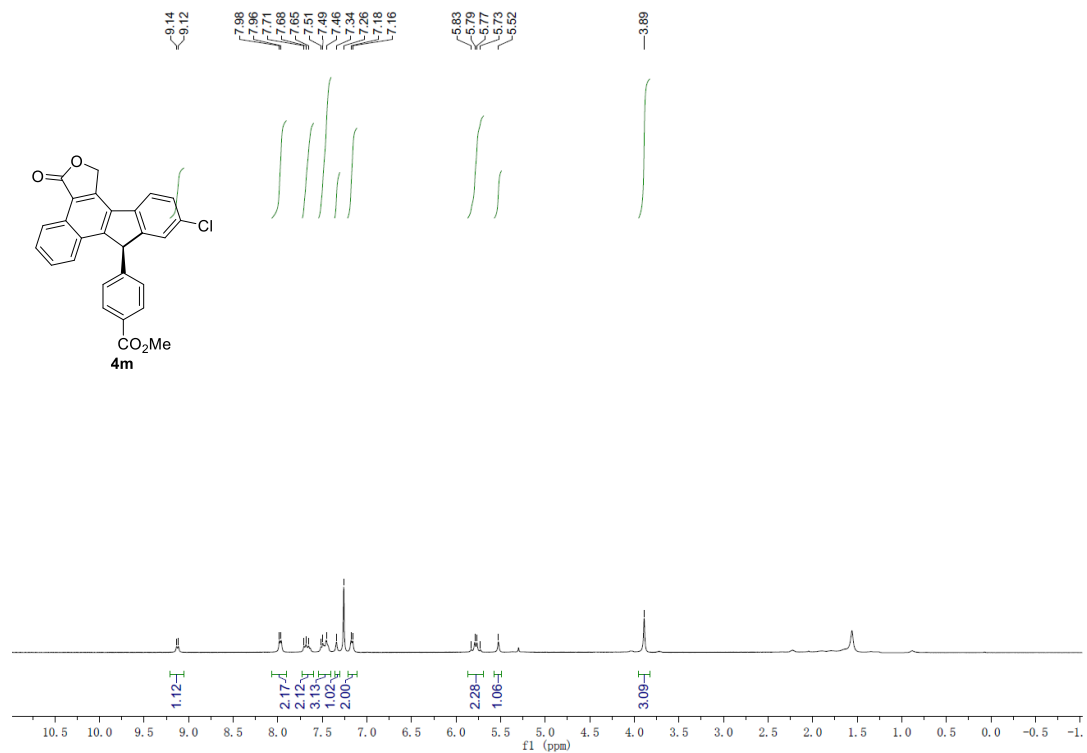

Supplementary Figure 52. <sup>1</sup>H NMR (600 MHz, CDCl<sub>3</sub>) spectrum for 4m

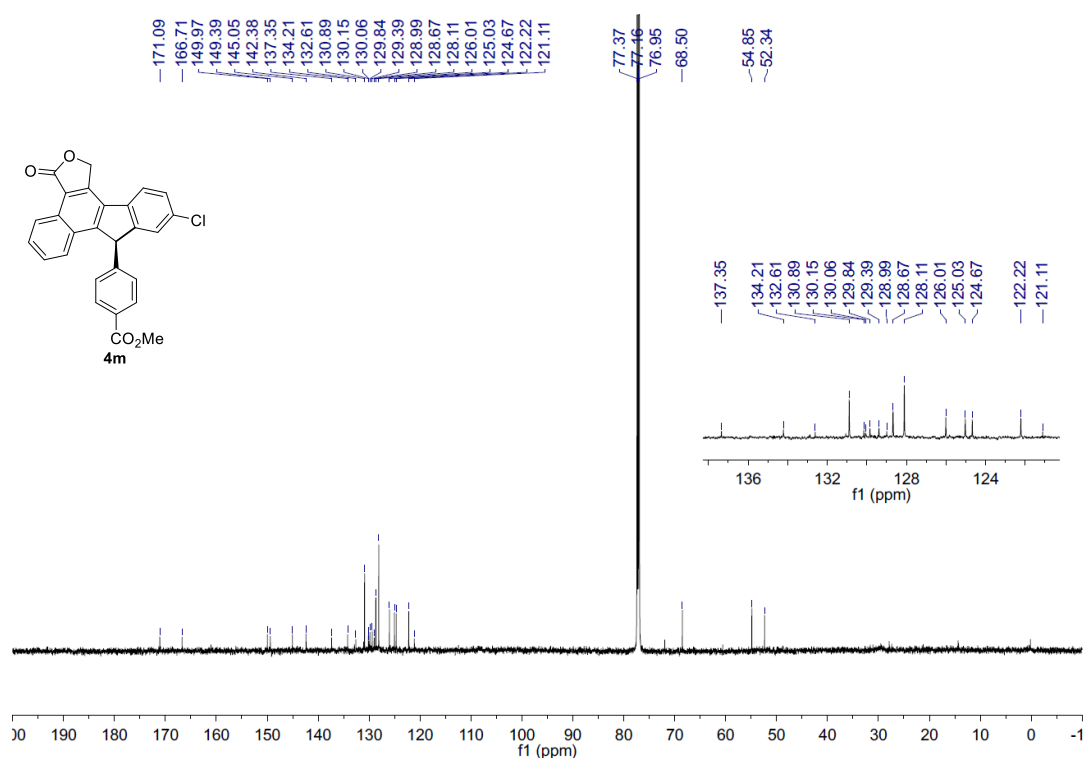

Supplementary Figure 53. <sup>13</sup>C NMR (150 MHz, CDCl<sub>3</sub>) spectrum for 4m

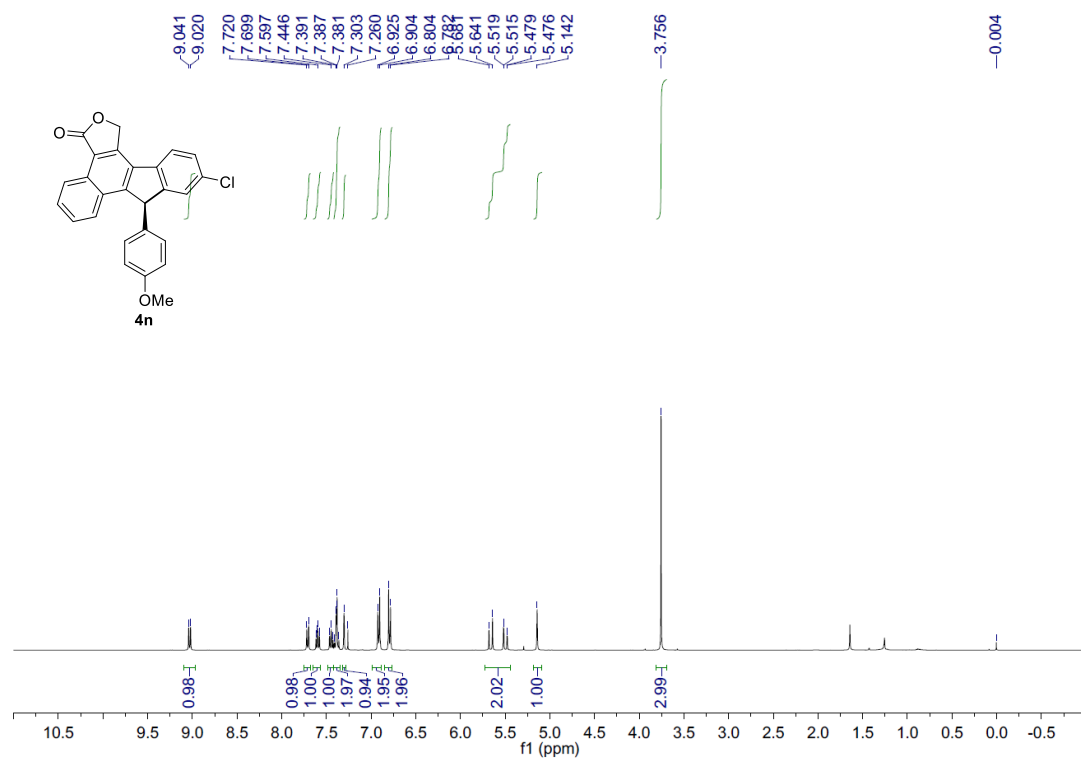

Supplementary Figure 54. <sup>1</sup>H NMR (400 MHz, CDCl<sub>3</sub>) spectrum for 4n

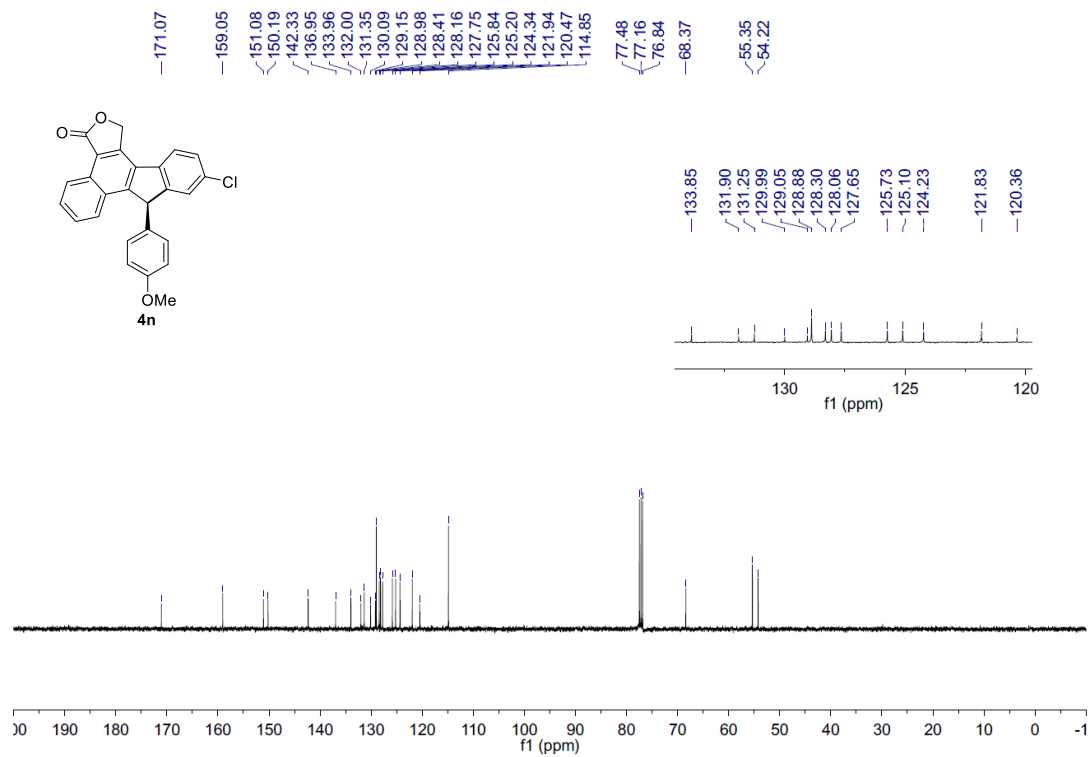

Supplementary Figure 55. <sup>13</sup>C NMR (100 MHz, CDCl<sub>3</sub>) spectrum for 4n



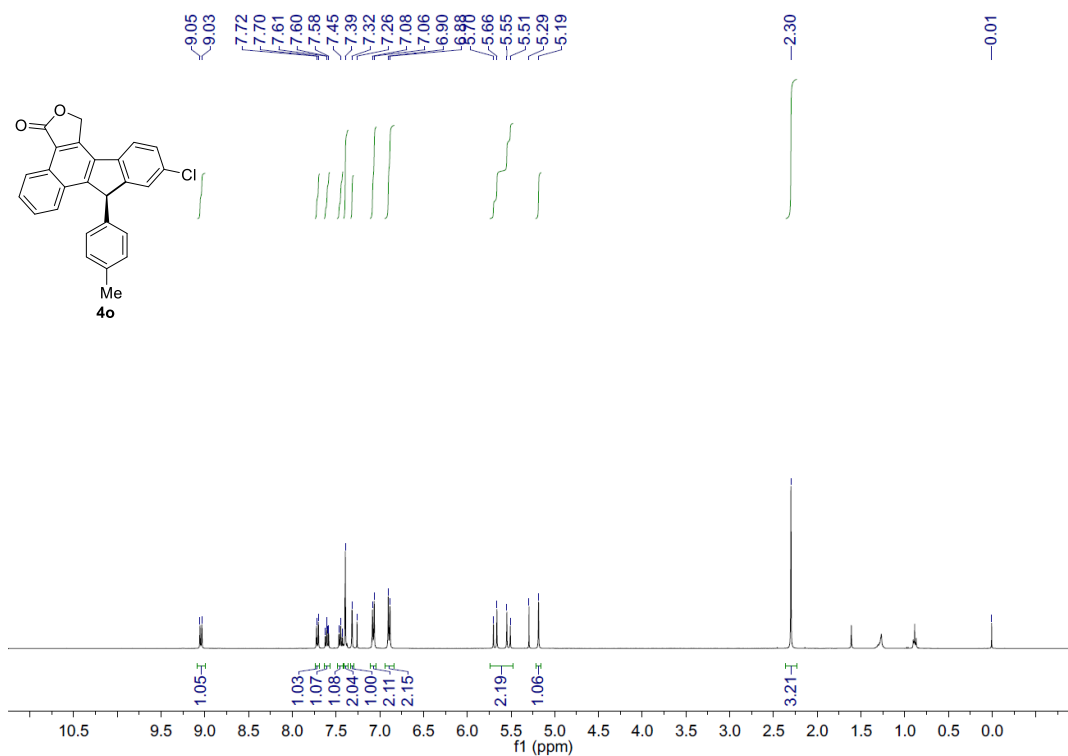

Supplementary Figure 56 <sup>1</sup>H NMR (400 MHz, CDCl<sub>3</sub>) spectrum for 4o

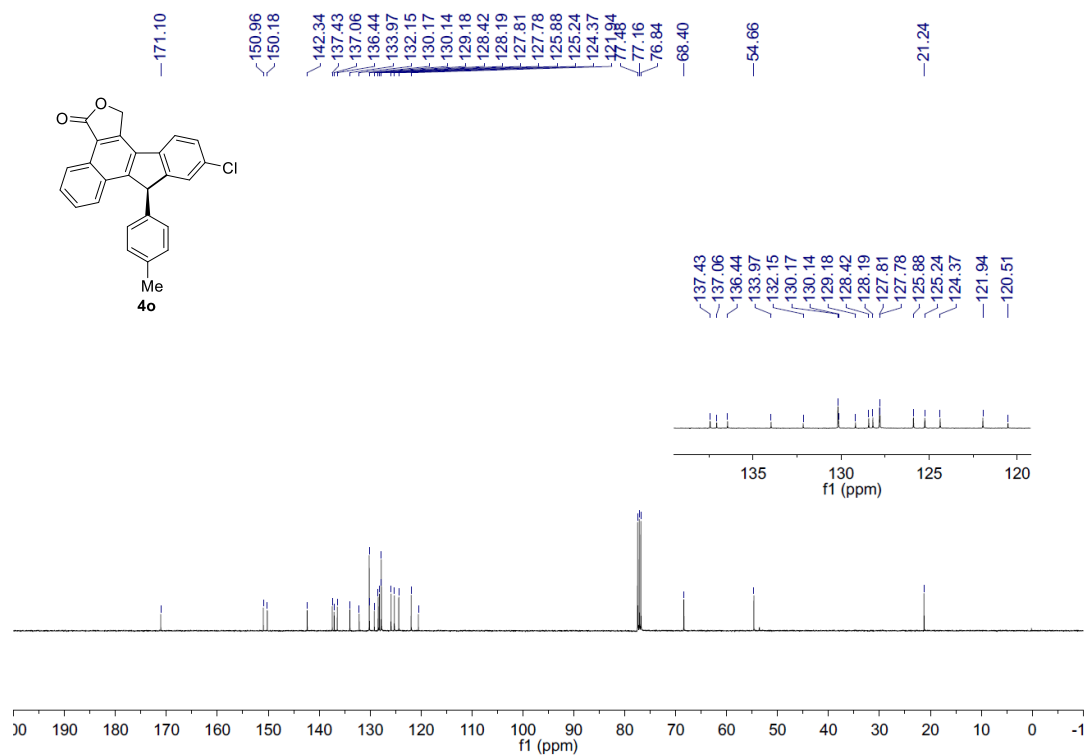

Supplementary Figure 57. <sup>13</sup>C NMR (100 MHz, CDCl<sub>3</sub>) spectrum for 4o

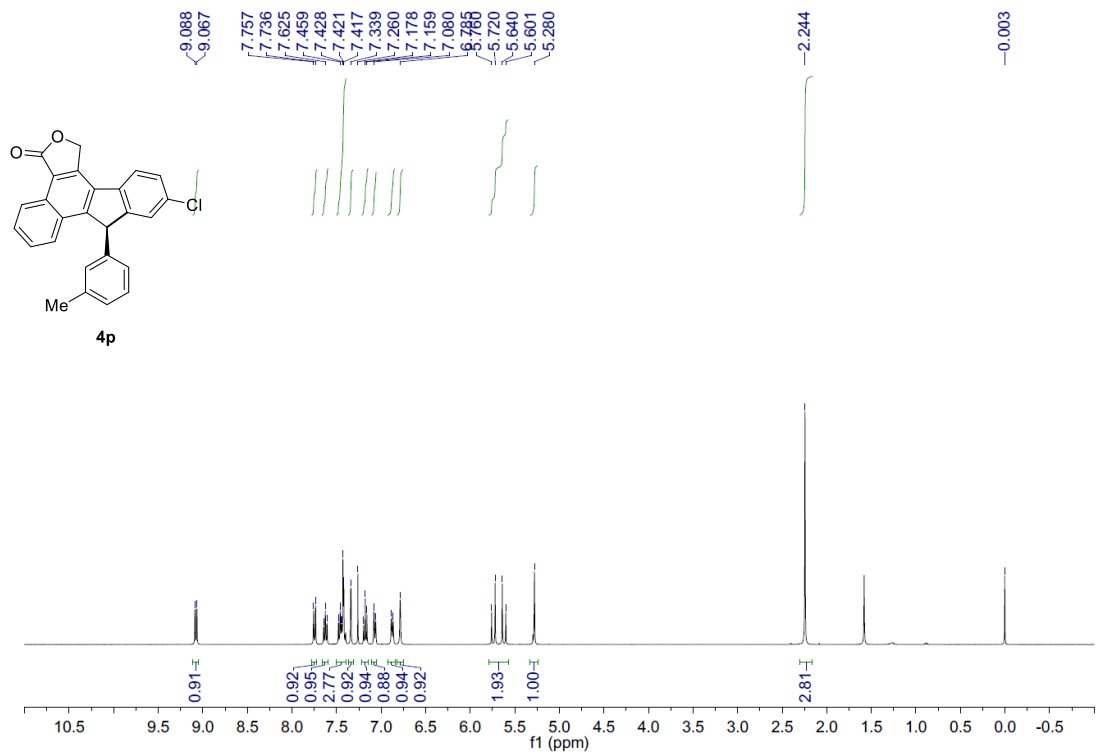

Supplementary Figure 58. <sup>1</sup>H NMR (400 MHz, CDCl<sub>3</sub>) spectrum for **4p**

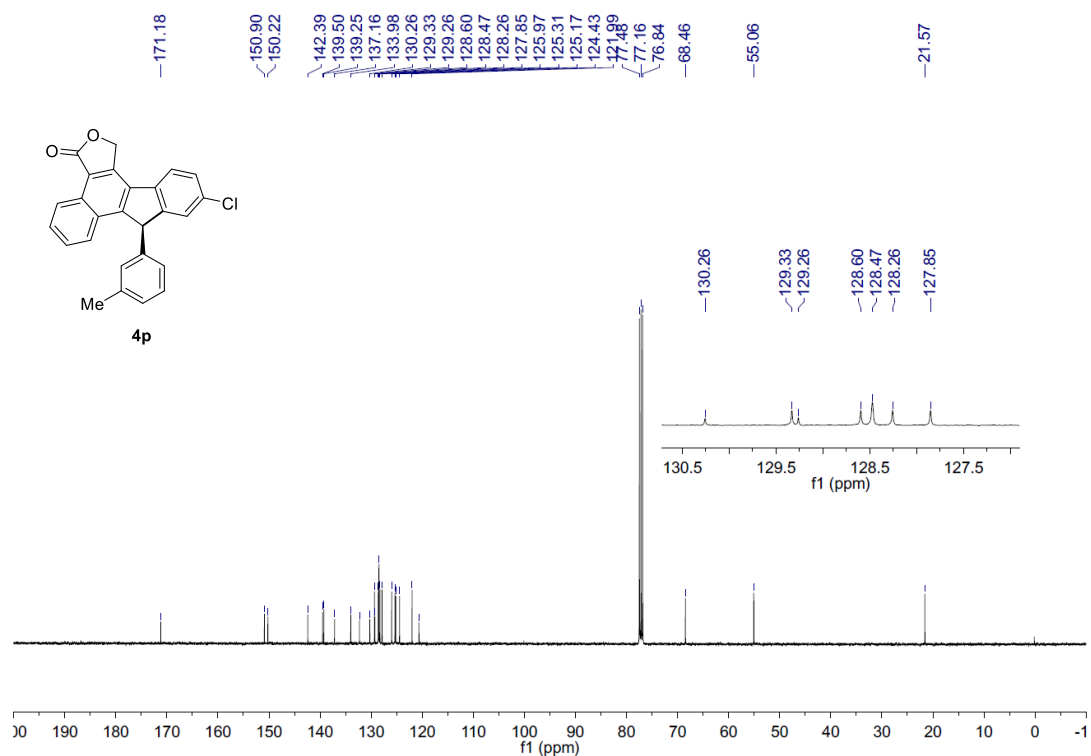

Supplementary Figure 59. <sup>13</sup>C NMR (100 MHz, CDCl<sub>3</sub>) spectrum for **4p**

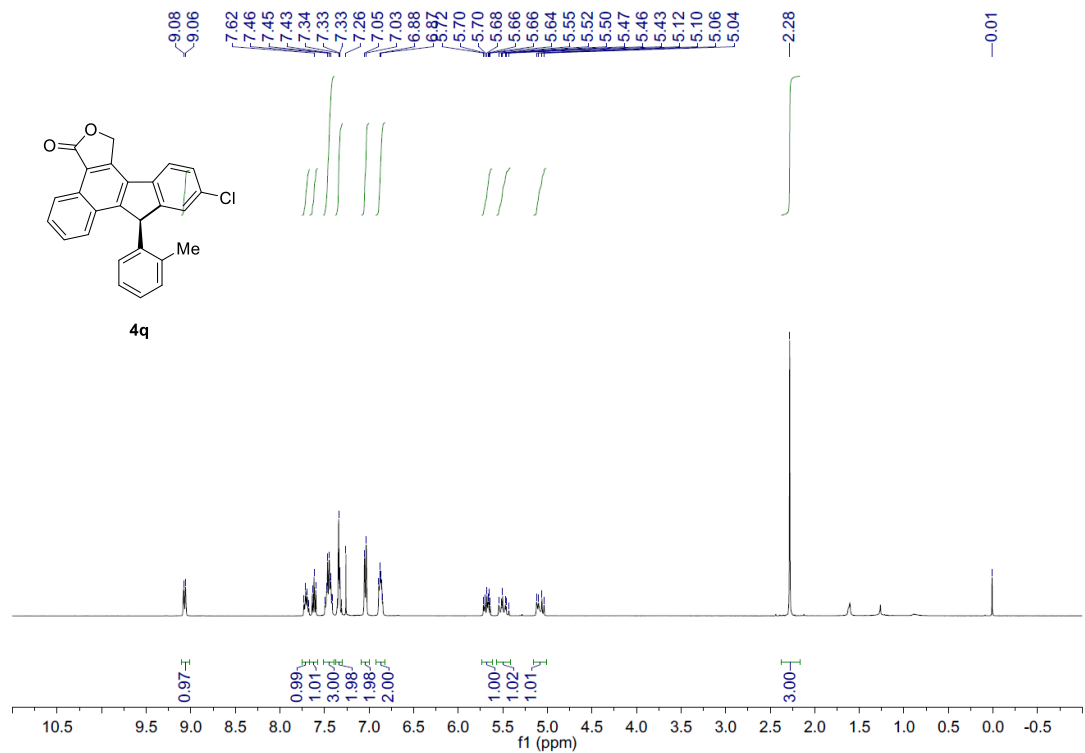

Supplementary Figure 60. <sup>1</sup>H NMR (400 MHz, CDCl<sub>3</sub>) spectrum for 4q

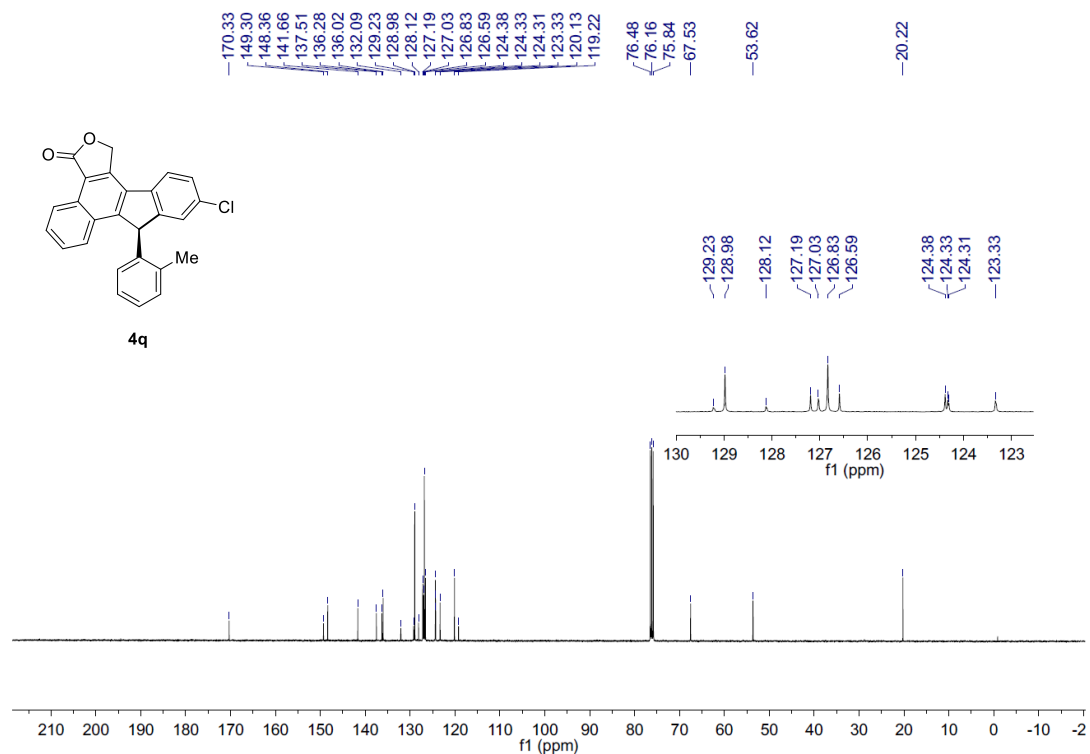

Supplementary Figure 61. <sup>13</sup>C NMR (100 MHz, CDCl<sub>3</sub>) spectrum for 4q

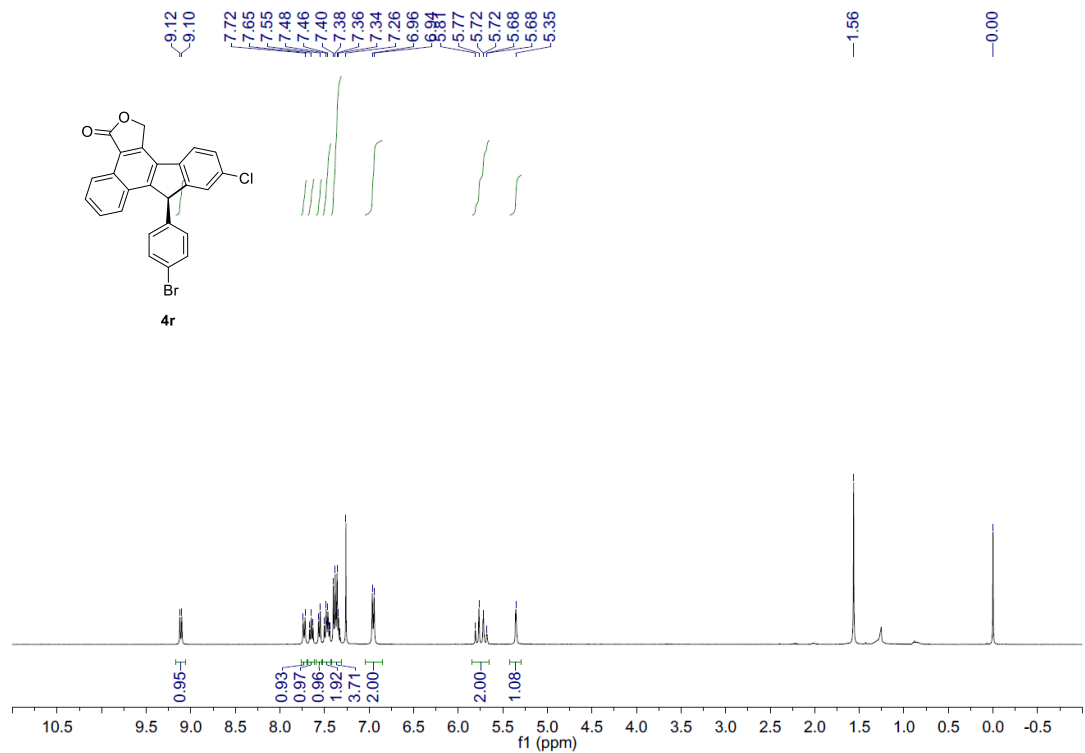

Supplementary Figure 62.  $^1\text{H NMR}$  (400 MHz,  $\text{CDCl}_3$ ) spectrum for **4r**

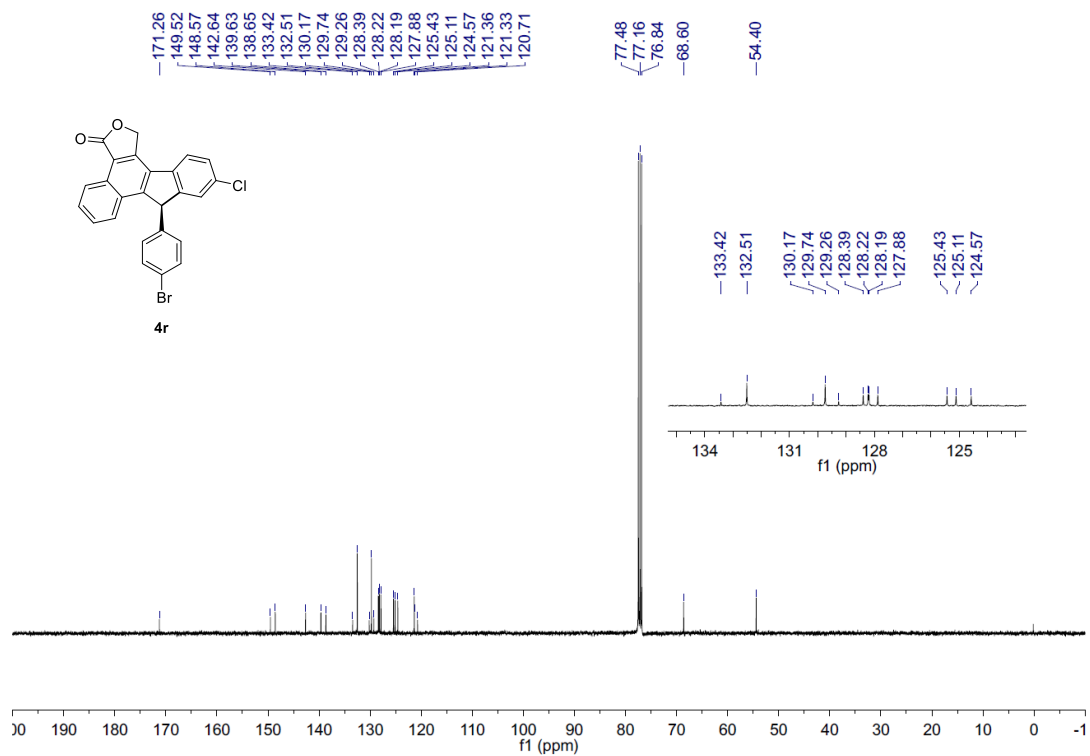

Supplementary Figure 63.  $^{13}\text{C NMR}$  (100 MHz,  $\text{CDCl}_3$ ) spectrum for **4r**

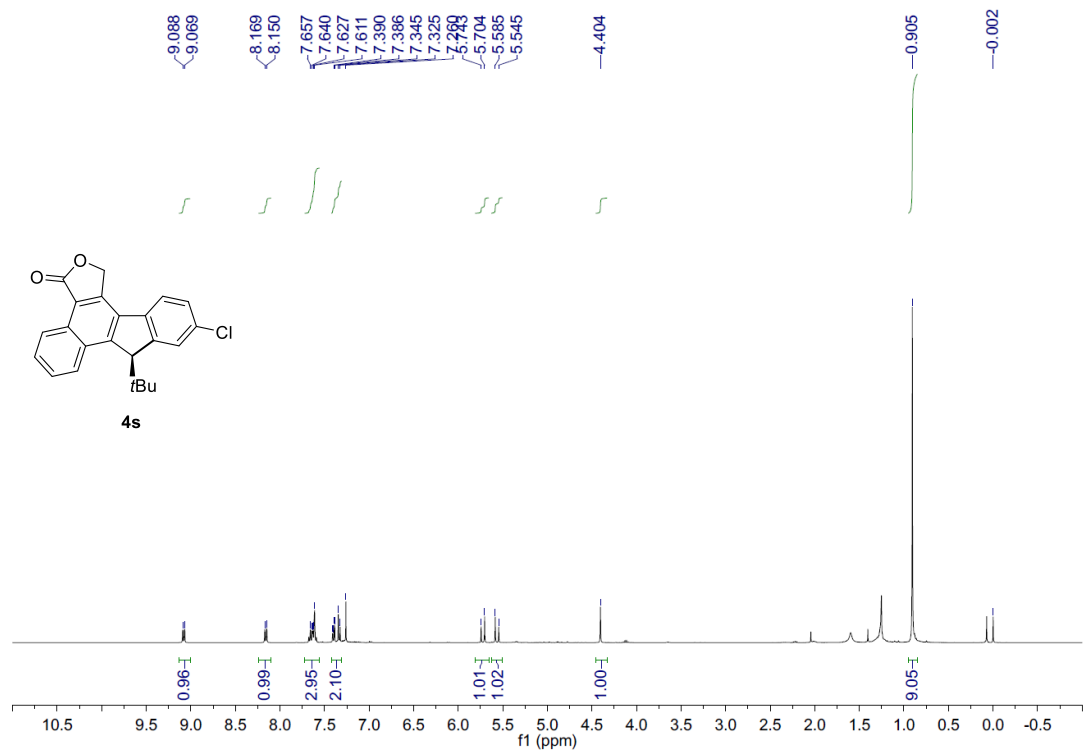

Supplementary Figure 64. <sup>1</sup>H NMR (600 MHz, CDCl<sub>3</sub>) spectrum for 4s

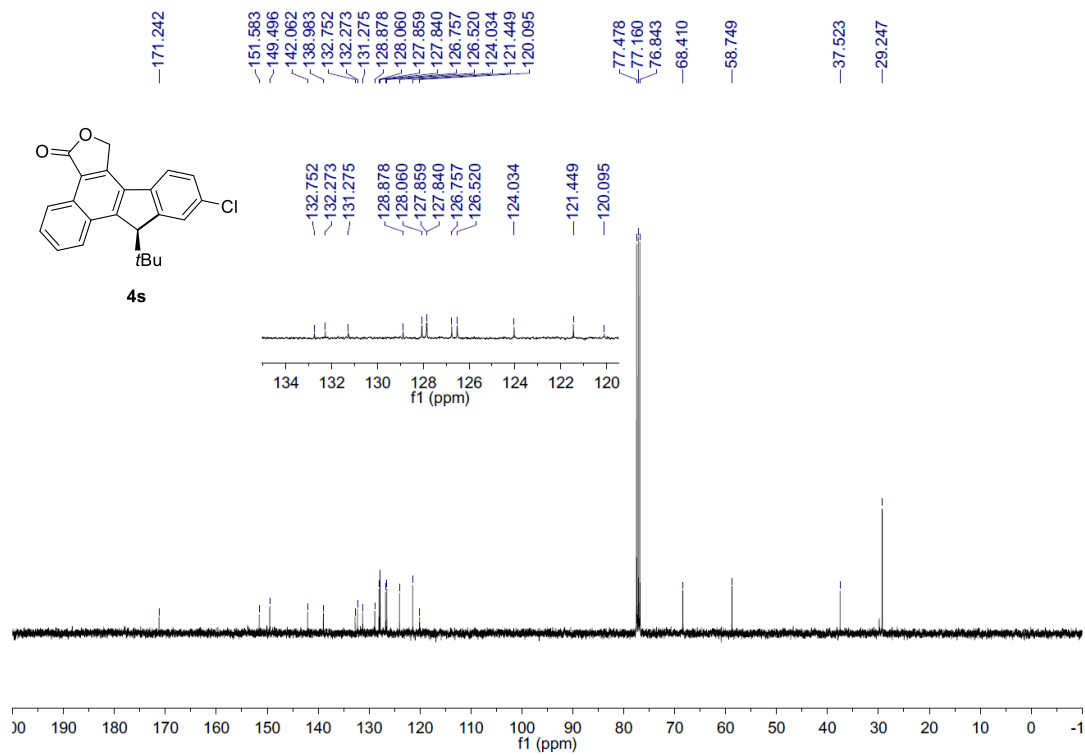

Supplementary Figure 65. <sup>13</sup>C NMR (150 MHz, CDCl<sub>3</sub>) spectrum for 4s

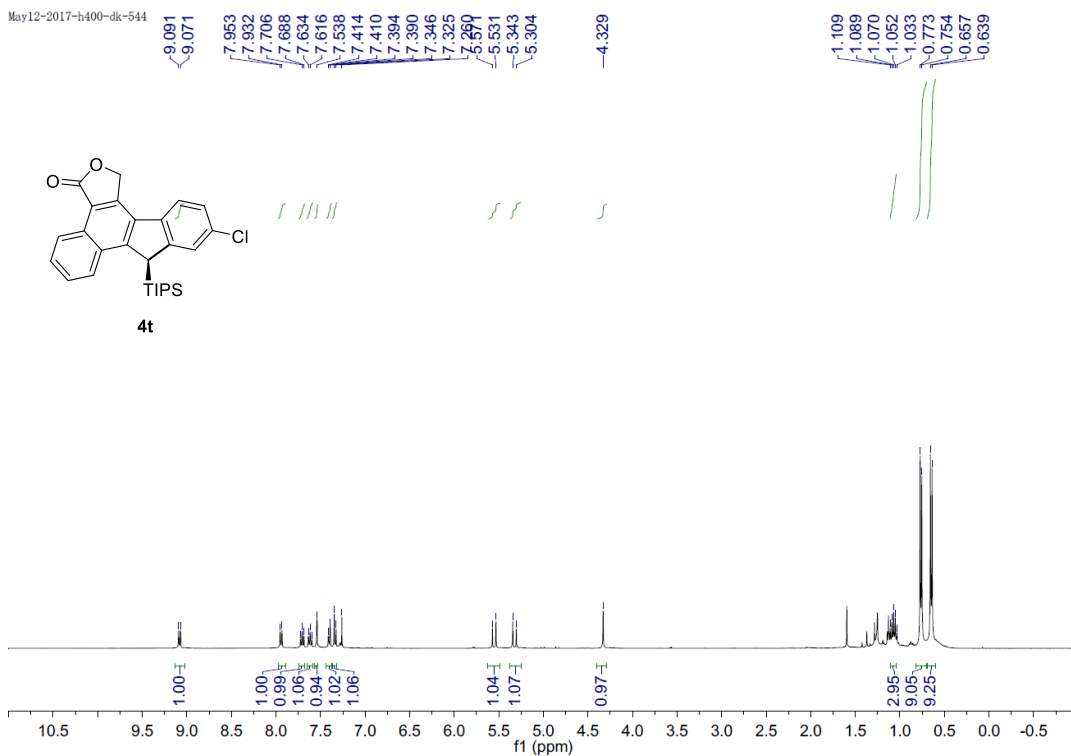

Supplementary Figure 66. <sup>1</sup>H NMR (400 MHz, CDCl<sub>3</sub>) spectrum for **4t**

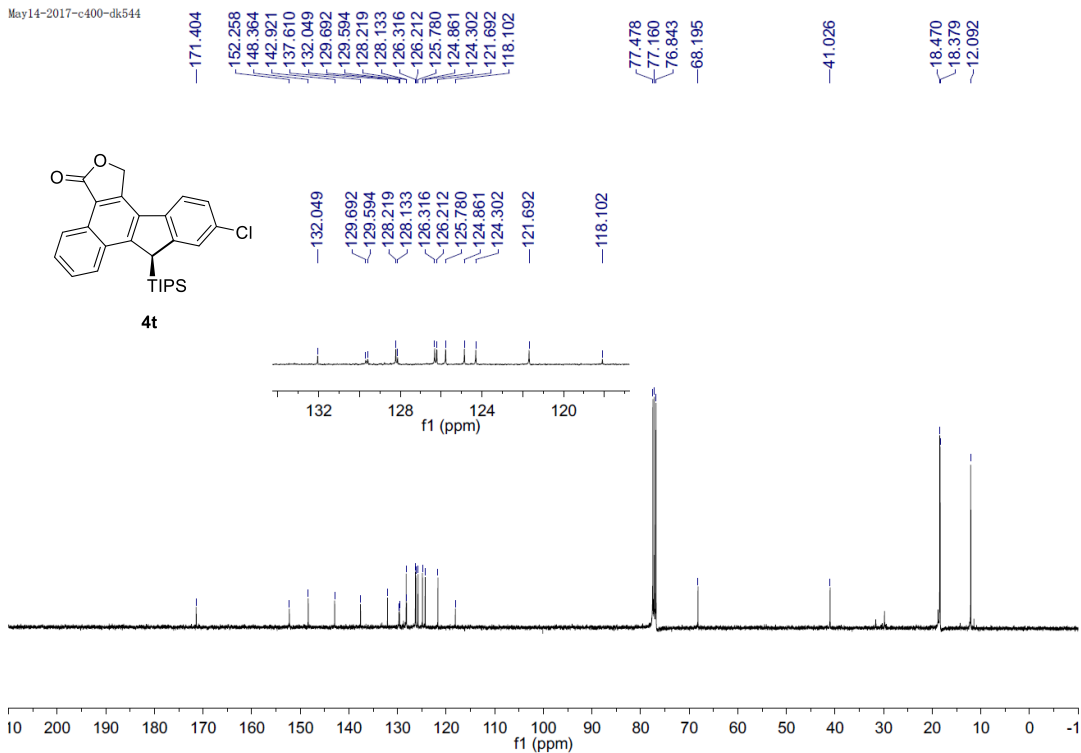

Supplementary Figure 67. <sup>13</sup>C NMR (100 MHz, CDCl<sub>3</sub>) spectrum for **4t**

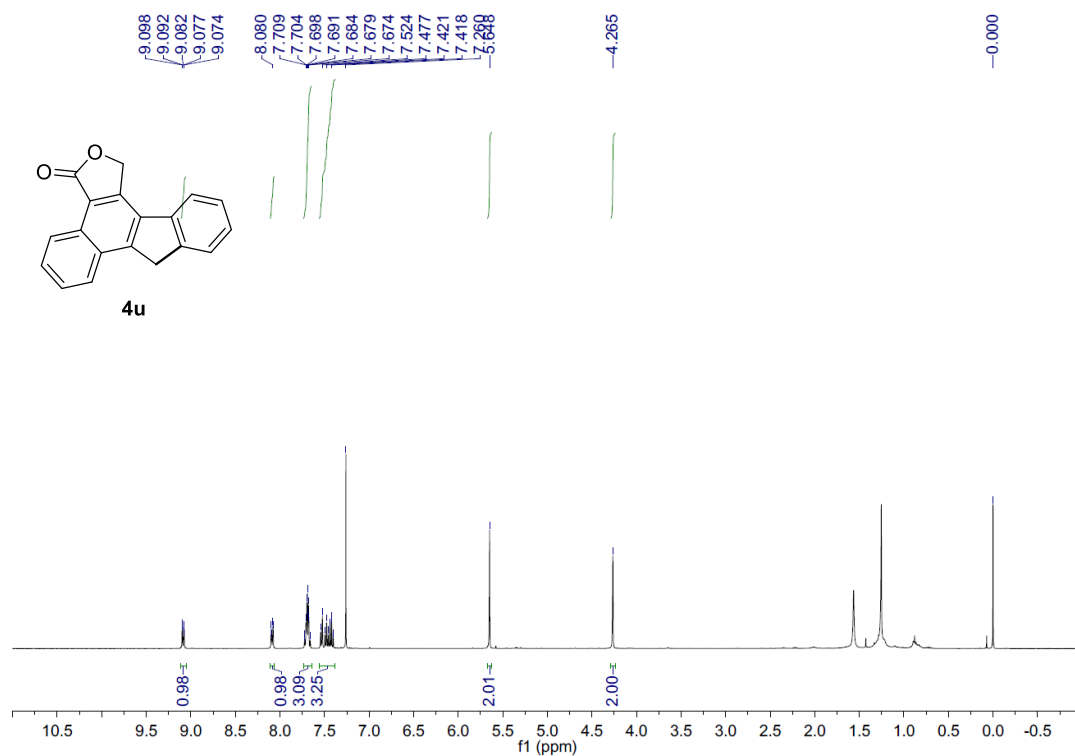

Supplementary Figure 68. <sup>1</sup>H NMR (400 MHz, CDCl<sub>3</sub>) spectrum for **4u**

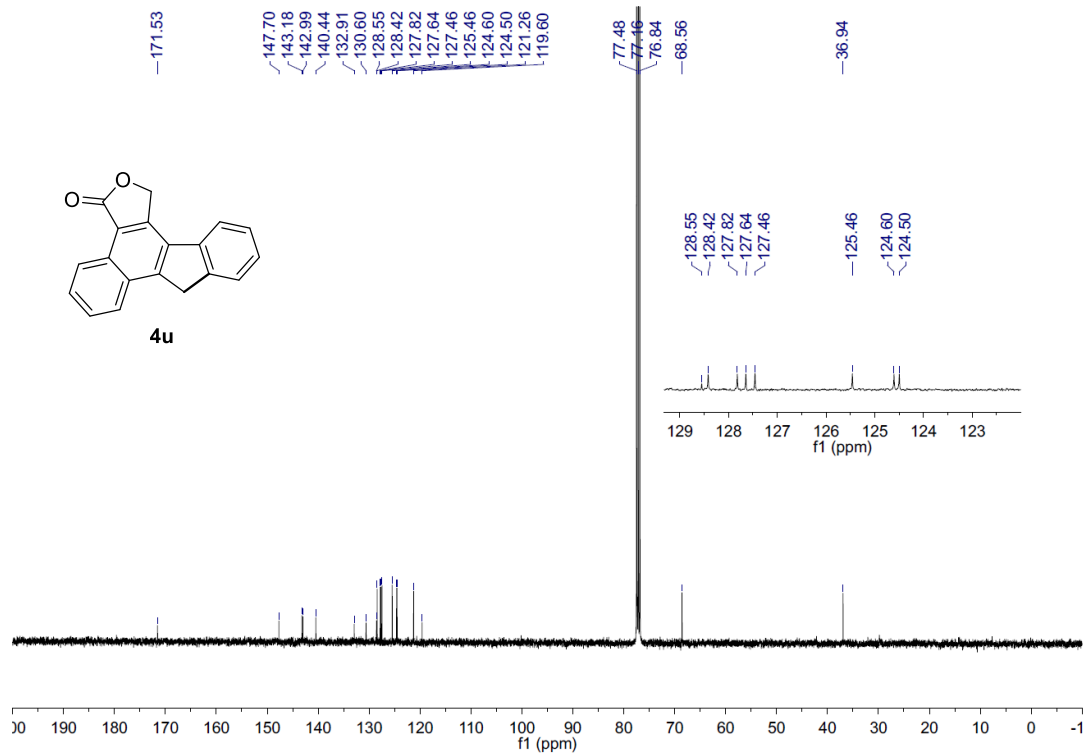

Supplementary Figure 69. <sup>13</sup>C NMR (100 MHz, CDCl<sub>3</sub>) spectrum for **4u**





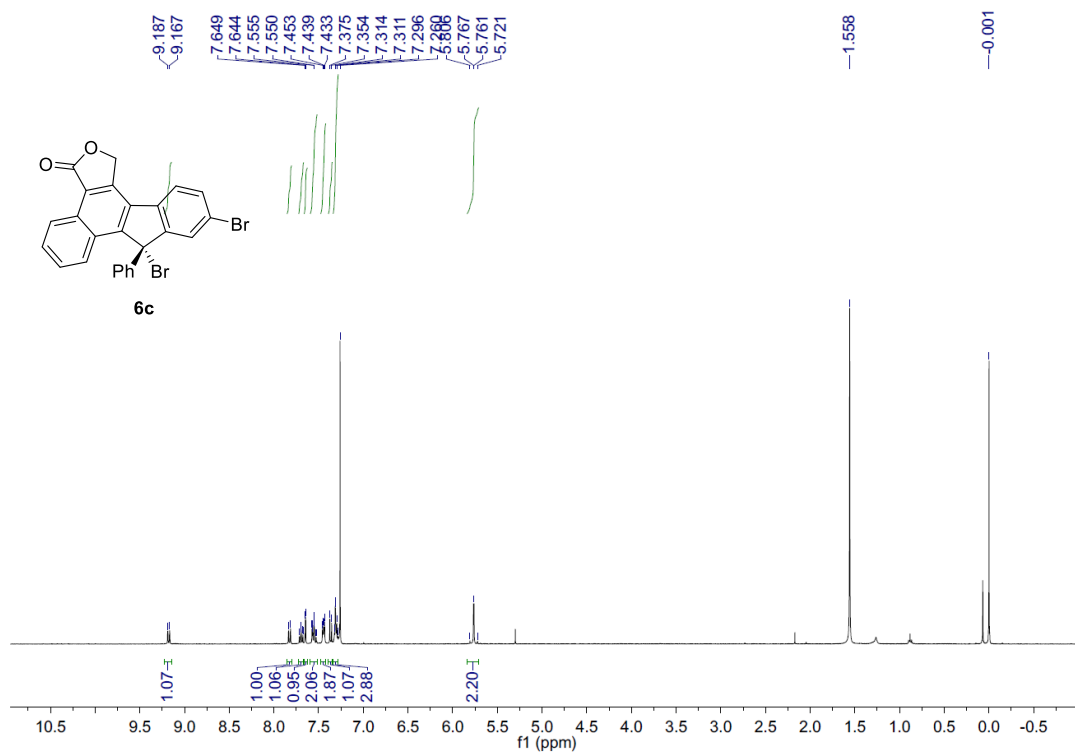

Supplementary Figure 72. <sup>1</sup>H NMR (400 MHz, CDCl<sub>3</sub>) spectrum for **6c**

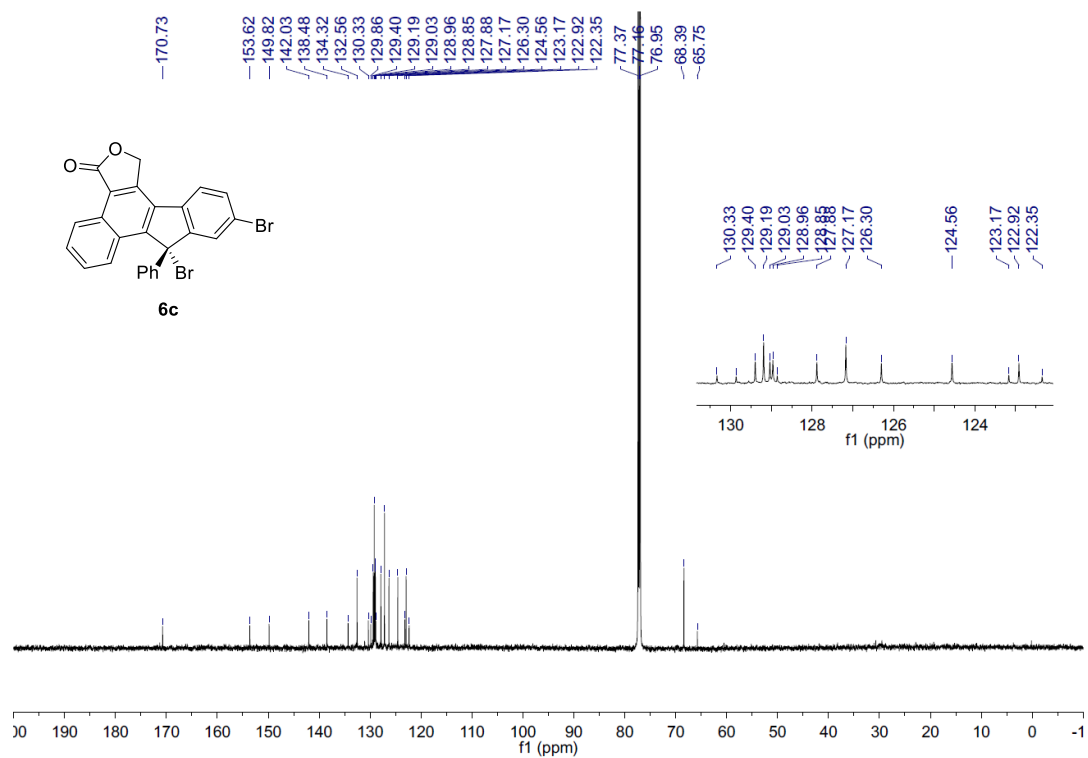

Supplementary Figure 73. <sup>13</sup>C NMR (100 MHz, CDCl<sub>3</sub>) spectrum for **6c**

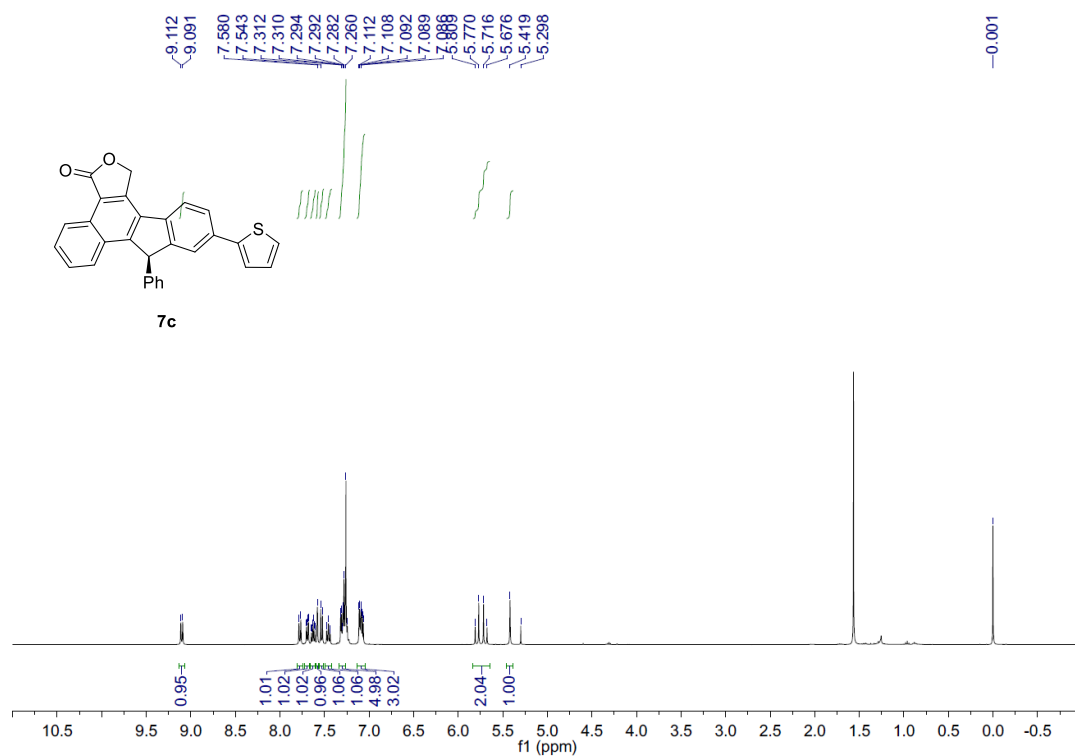

Supplementary Figure 74. <sup>1</sup>H NMR (400 MHz, CDCl<sub>3</sub>) spectrum for 7c

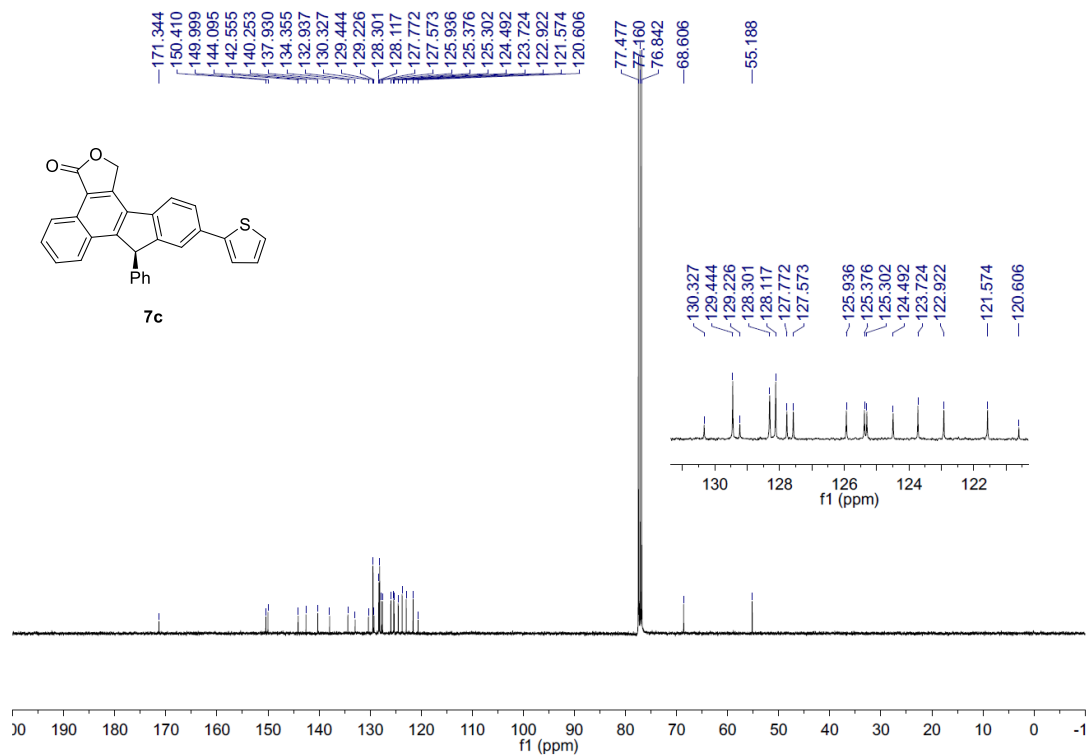

Supplementary Figure 75. <sup>13</sup>C NMR (100 MHz, CDCl<sub>3</sub>) spectrum for 7c

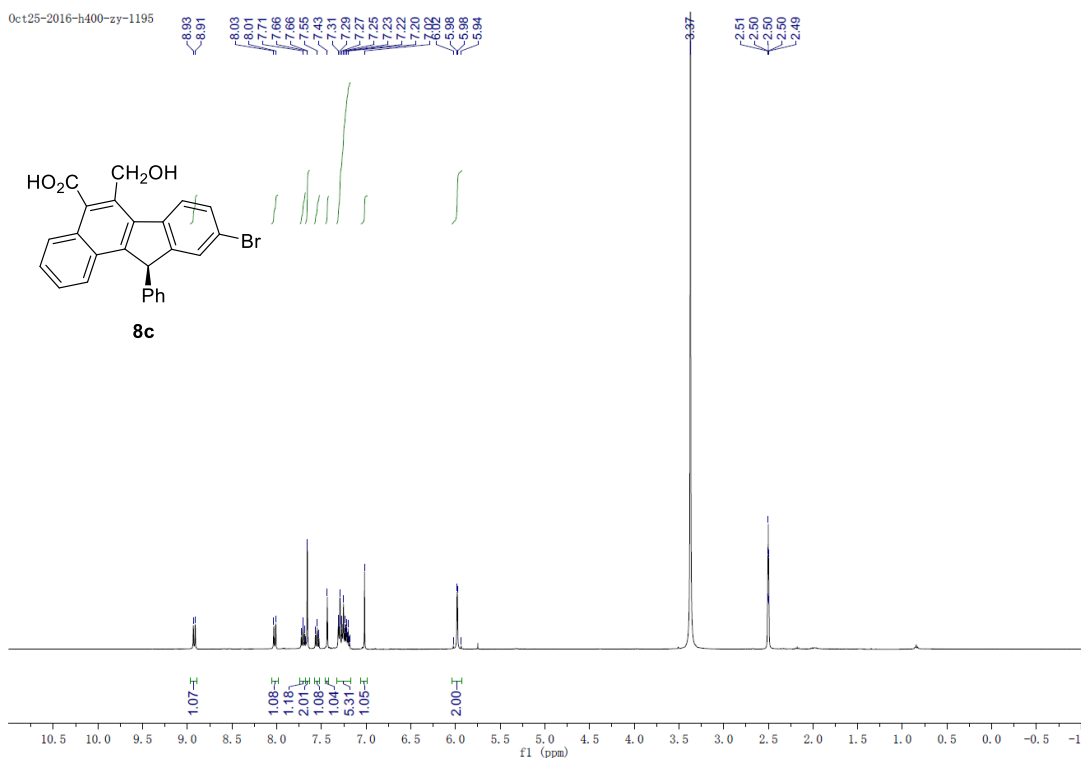

Supplementary Figure 76.  $^1\text{H}$  NMR (400 MHz,  $\text{CDCl}_3$ ) spectrum for **8c**

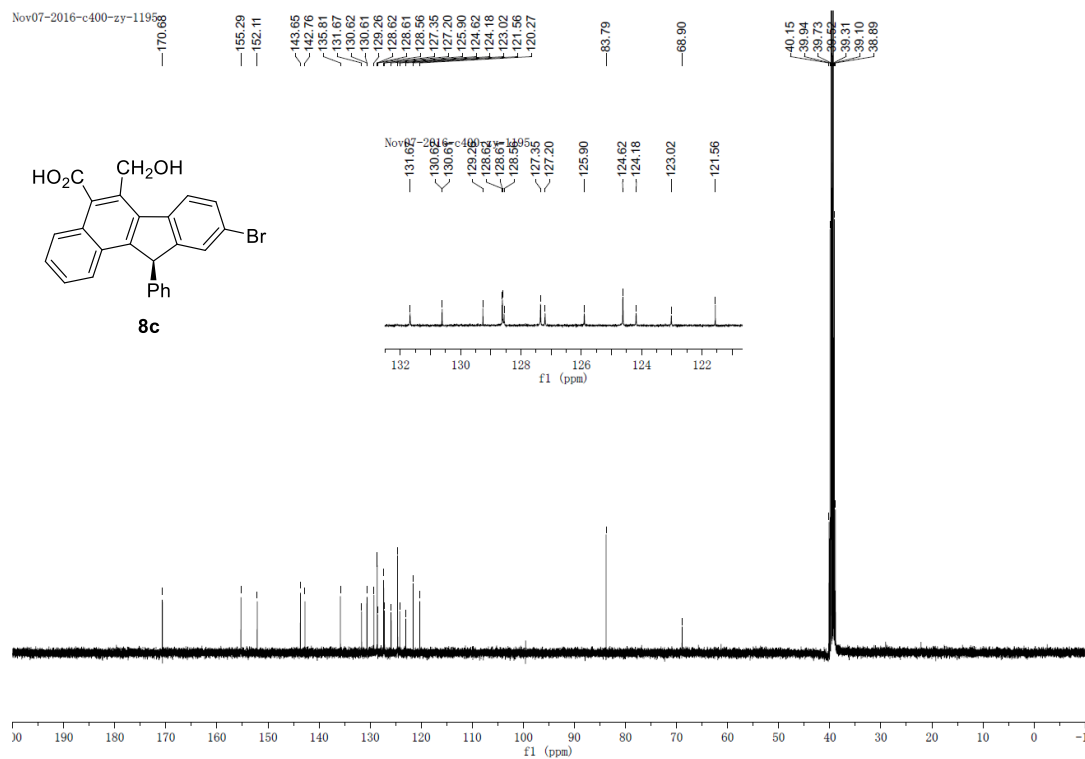

Supplementary Figure 77.  $^{13}\text{C}$  NMR (100 MHz,  $\text{CDCl}_3$ ) spectrum for **8c**

## HPLC Traces of Racemic and Chiral 2, 4.

Conditions: hexane/2-propanol/ethanol = 99.2:0.4:0.4

Flow rate = 1.0 mL/min,  $\lambda = 272$  nm, Chiral IB-3

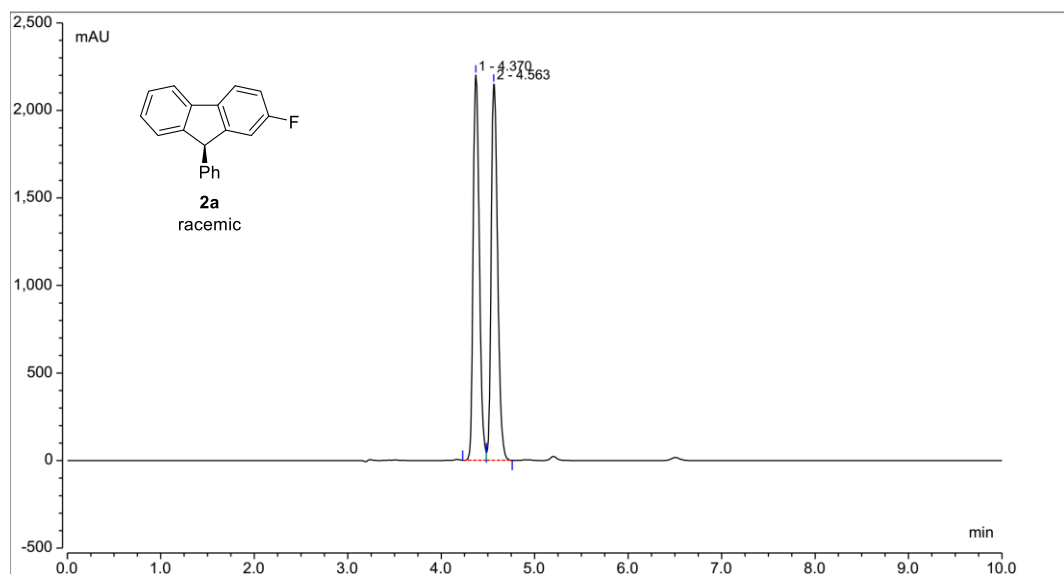

| Entry | RT min | Area mAU*min | Height mAU | % Area % | % Height % |
|-------|--------|--------------|------------|----------|------------|
| 1     | 4.370  | 168.037      | 2200.228   | 49.38    | 50.59      |
| 2     | 4.563  | 172.259      | 2148.612   | 50.62    | 49.41      |

## Supplementary Figure 78. HPLC trace for 2-Fluoro-9-phenyl-9H-fluorene (*rac*-2a)

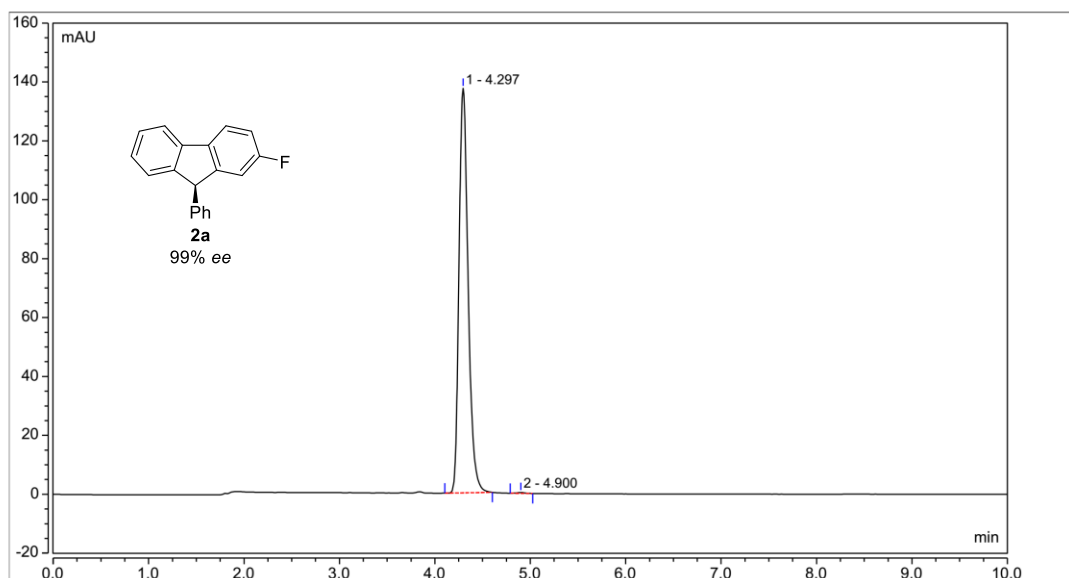

| Entry | RT min | Area mAU*min | Height mAU | % Area % | % Height % |
|-------|--------|--------------|------------|----------|------------|
| 1     | 4.297  | 15.225       | 137.312    | 99.82    | 99.79      |
| 2     | 4.900  | 0.027        | 0.287      | 0.18     | 0.21       |

## Supplementary Figure 79. HPLC trace for (*S*)-2-Fluoro-9-phenyl-9H-fluorene (2a)

Conditions: hexane/2-propanol/ethanol = 99.6:0.2:0.2

Flow rate = 1.0 mL/min,  $\lambda = 272$  nm, Chiral IB-3

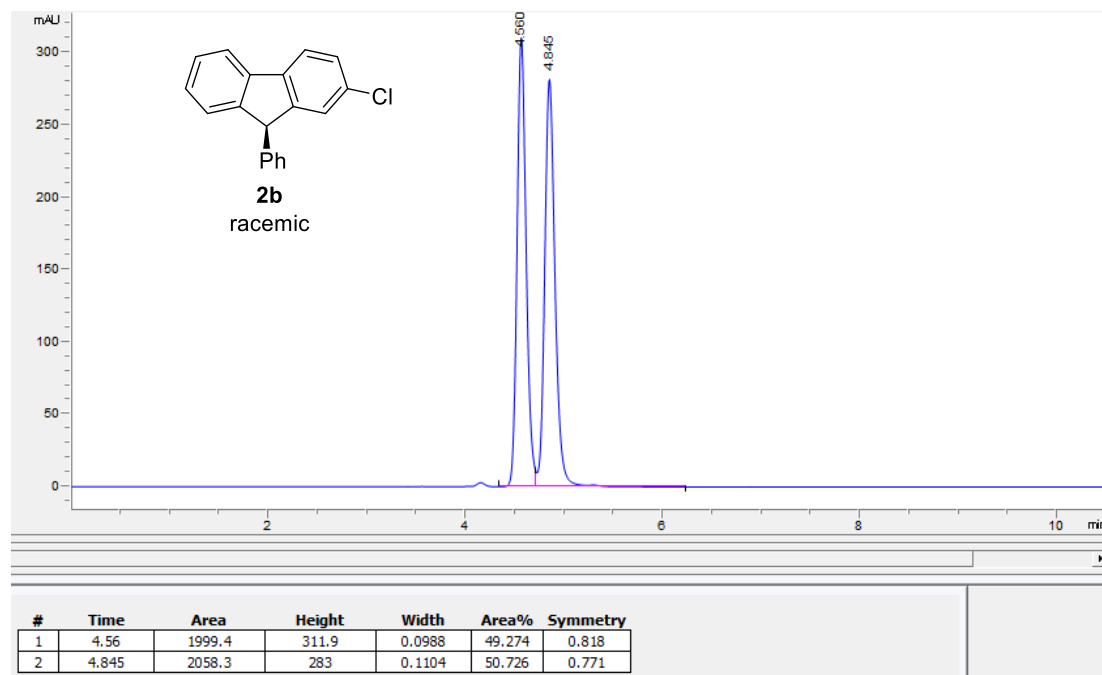

Supplementary Figure 80. HPLC trace for 2-Chloro -9-phenyl-9H-fluorene (*rac*-2b)

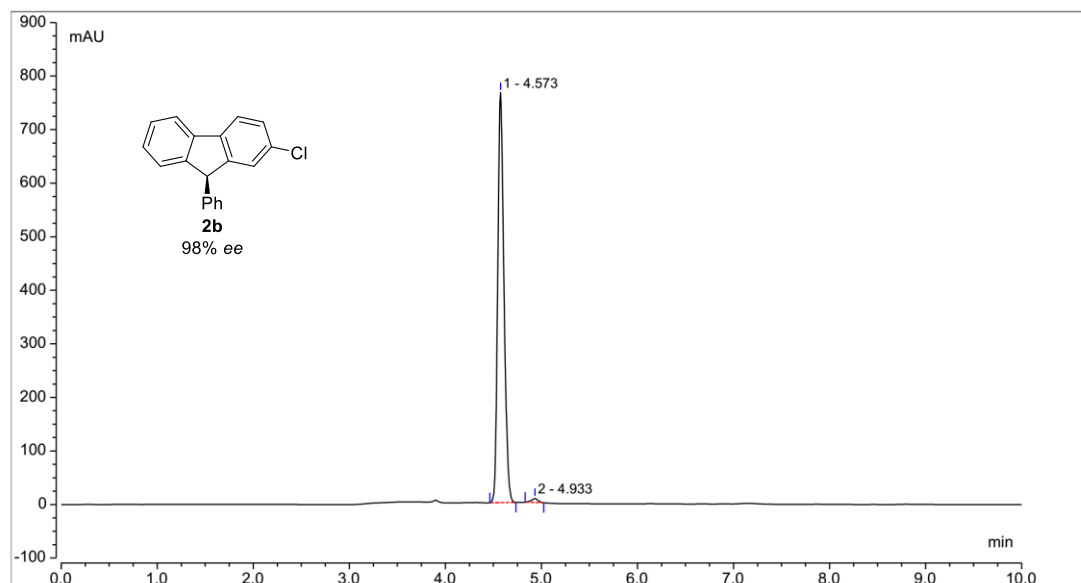

Supplementary Figure 81. HPLC trace for 2-Chloro -9-phenyl-9H-fluorene (2b)

Conditions: hexane/2-propanol/ethanol = 99.2:0.4:0.4

Flow rate = 1.0 mL/min,  $\lambda = 272$  nm, Chiral IB-3

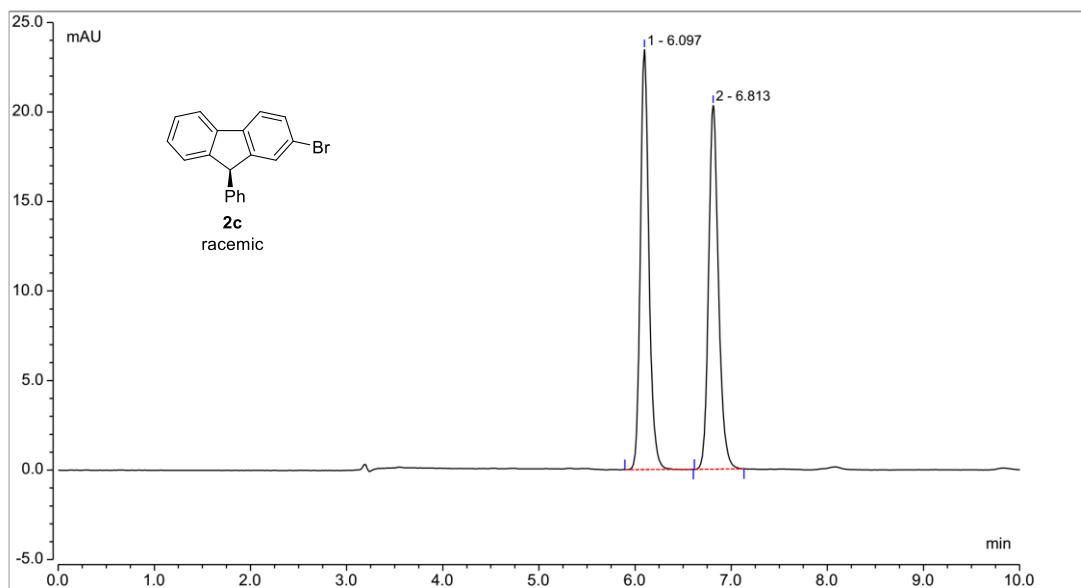

Supplementary Figure 82. HPLC trace for 2-Bromo -9-phenyl-9H-fluorene (*rac*-2c)

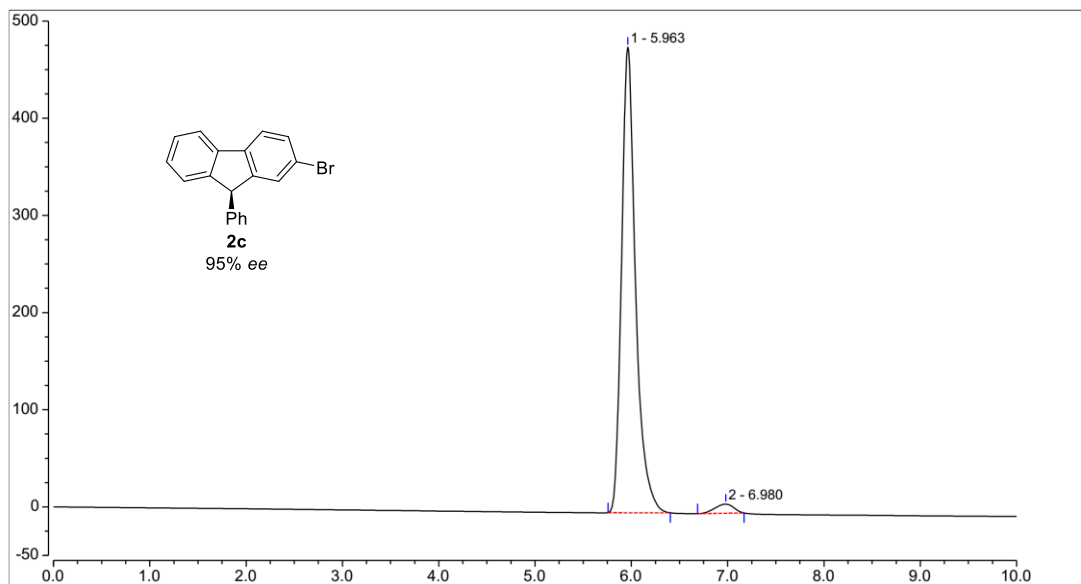

Supplementary Figure 83. HPLC trace for 2-Bromo -9-phenyl-9H-fluorene (2c)

Conditions: hexane/2-propanol/ethanol = 99.2:0.4:0.4

Flow rate = 1.0 mL/min,  $\lambda = 272$  nm, Chiral IB-3

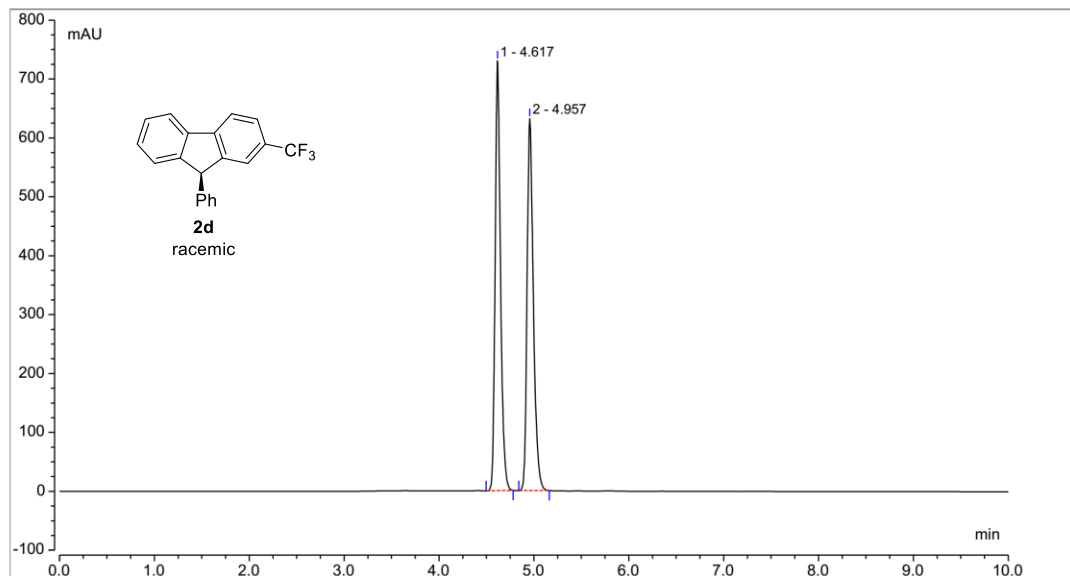

**Supplementary Figure 84. HPLC trace for 9-Phenyl-2-(trifluoromethyl)-9H-fluorene (*rac*-2d)**

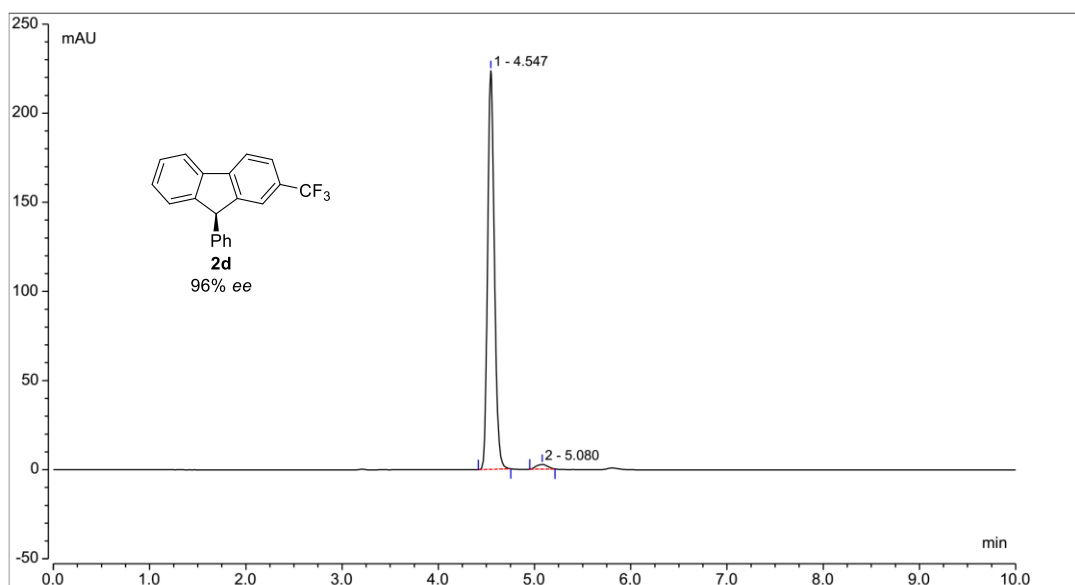

**Supplementary Figure 85. HPLC trace for 9-Phenyl-2-(trifluoromethyl)-9H-fluorene (2d)**

Conditions: hexane/2-propanol/ethanol = 99.2:0.4:0.4

Flow rate = 1.0 mL/min,  $\lambda = 272$  nm, Chiral IB-3

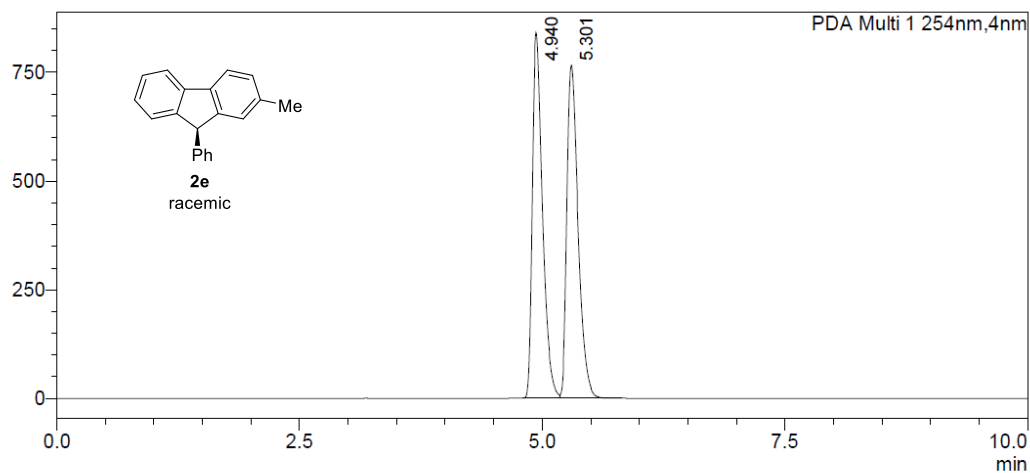

<Peak Table>

PDA Ch1 254nm

| Peak# | Ret. Time | Area     | Height  | Area%   | Height% |
|-------|-----------|----------|---------|---------|---------|
| 1     | 4.940     | 6148404  | 841354  | 49.889  | 52.326  |
| 2     | 5.301     | 6175733  | 766552  | 50.111  | 47.674  |
| Total |           | 12324138 | 1607906 | 100.000 | 100.000 |

Supplementary Figure 86. HPLC trace for 2-Methyl-9-phenyl-9H-fluorene (*rac*-2e)

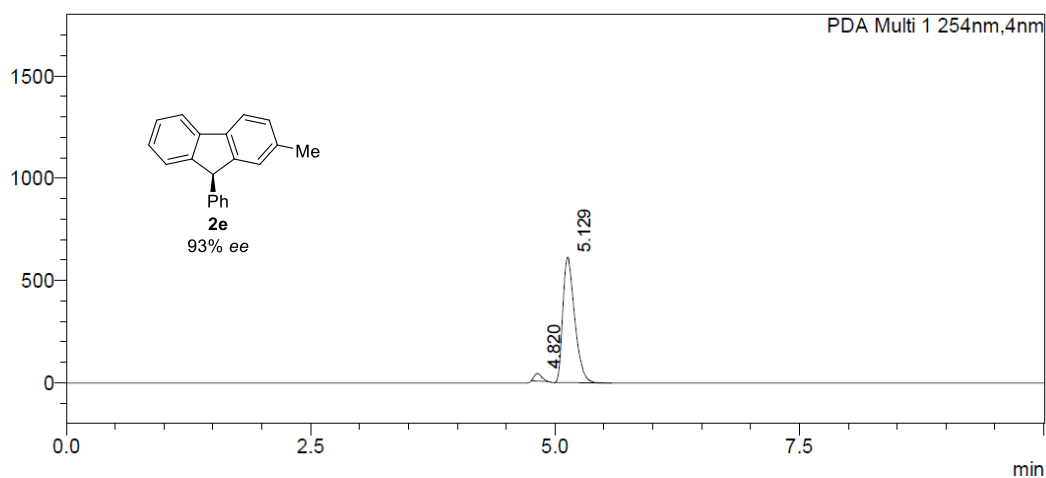

<Peak Table>

PDA Ch1 254nm

| Peak# | Ret. Time | Area    | Height | Area%  | Height% |
|-------|-----------|---------|--------|--------|---------|
| 1     | 4.820     | 191688  | 36409  | 3.548  | 5.601   |
| 2     | 5.129     | 5210422 | 613587 | 96.452 | 94.399  |

Supplementary Figure 87. HPLC trace for (*S*)-2-Methyl-9-phenyl-9H-fluorene (2e)



Conditions: hexane/2-propanol/ethanol = 99.6:0.2:0.2

Flow rate = 1.0 mL/min,  $\lambda = 272$  nm, Chiral IB-3

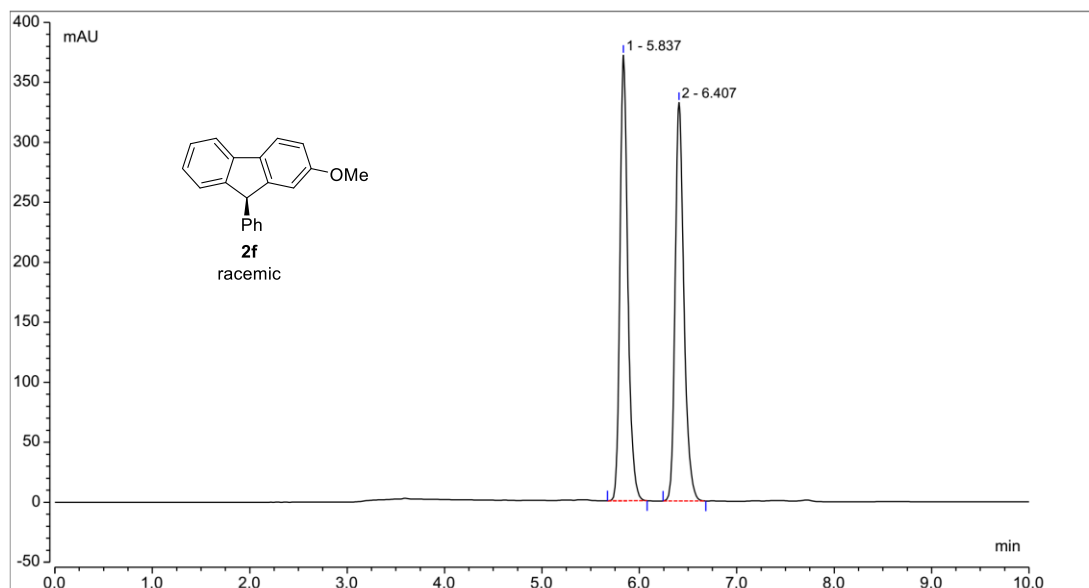

Supplementary Figure 88. HPLC trace for 2- Methoxy -9-phenyl-9H-fluorene (*rac*-2f)

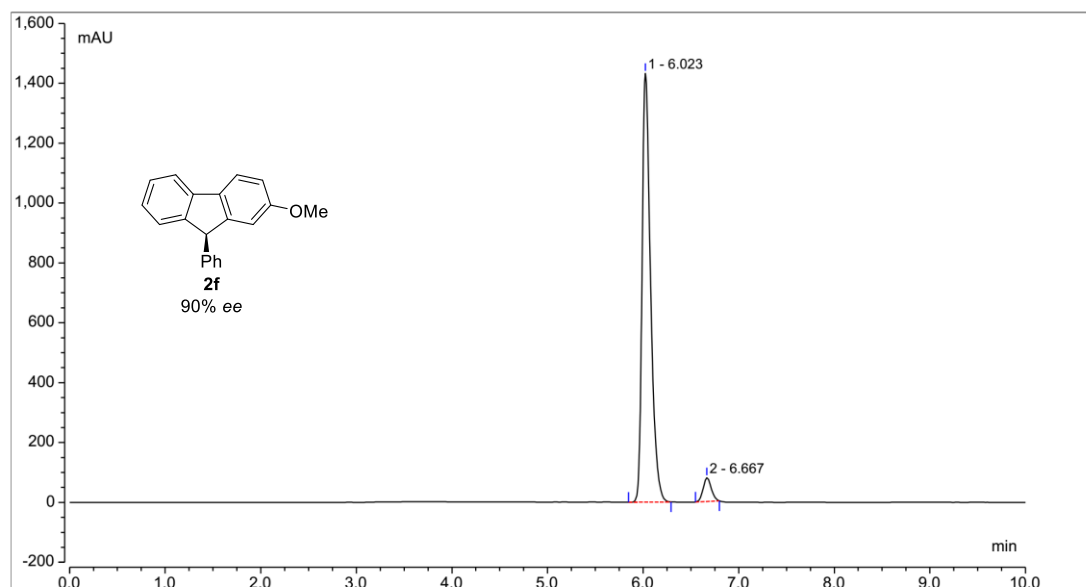

Supplementary Figure 89. HPLC trace for 2- Methoxy -9-phenyl-9H-fluorene (2f)

Conditions: hexane/2-propanol/ethanol = 99.1:0.45:0.45

Flow rate = 1.0 mL/min,  $\lambda$  = 272 nm, Chiral IB-3

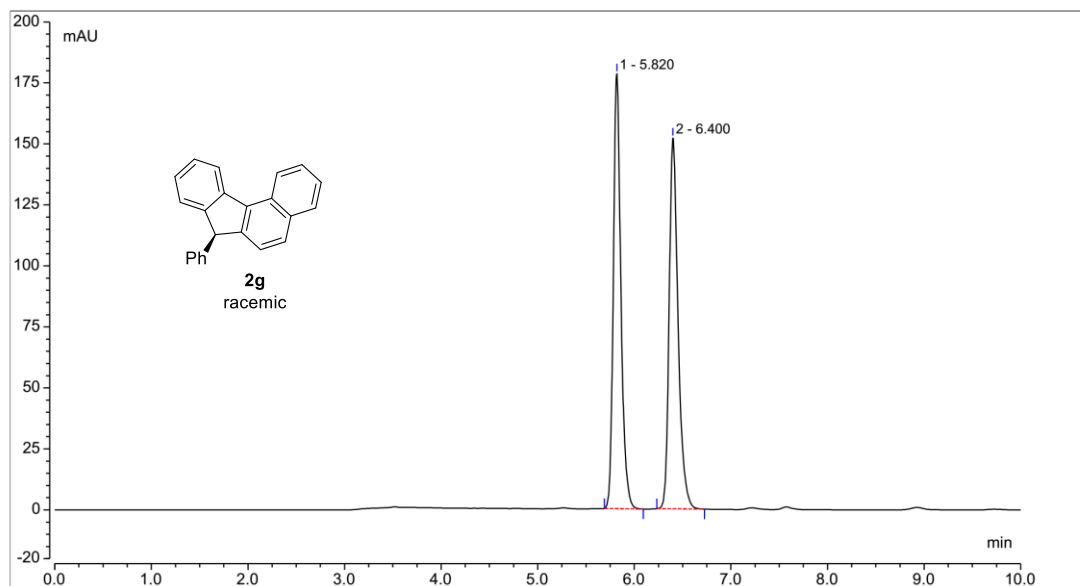

| Entry | RT min | Area mAU*min | Height mAU | % Area % | % Height % |
|-------|--------|--------------|------------|----------|------------|
| 1     | 5.820  | 16.161       | 178.185    | 49.90    | 53.98      |
| 2     | 6.400  | 16.226       | 151.906    | 50.10    | 46.02      |

Supplementary Figure 90. HPLC trace for 7-Phenyl-7H-benzo[c]fluorene (*rac*-2g)

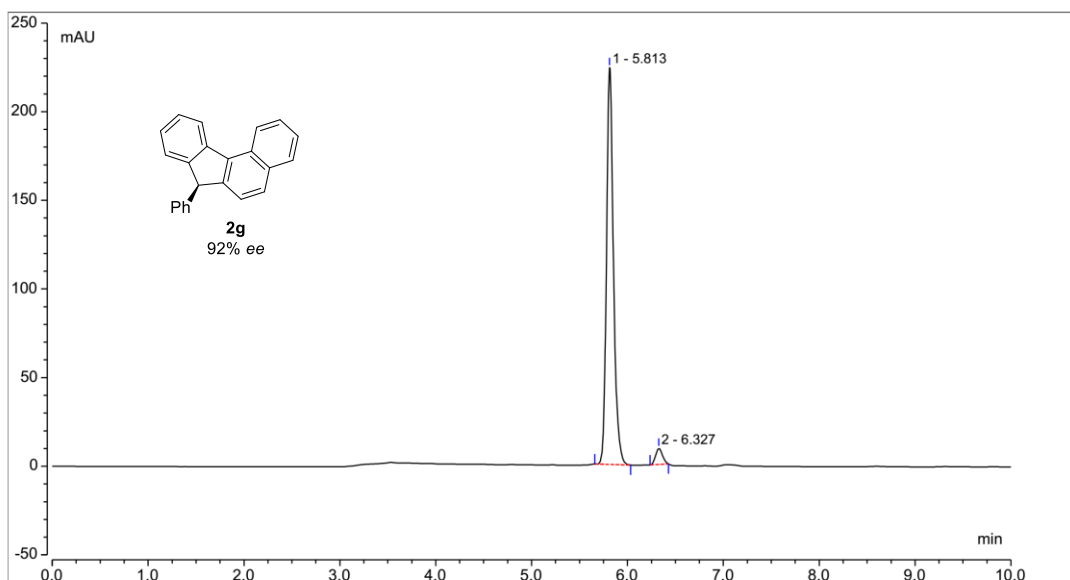

| Entry | RT min | Area mAU*min | Height mAU | % Area % | % Height % |
|-------|--------|--------------|------------|----------|------------|
| 1     | 5.813  | 18.873       | 223.801    | 96.18    | 96.11      |
| 2     | 6.327  | 0.749        | 9.061      | 3.82     | 3.89       |

Supplementary Figure 91. HPLC trace for (*S*)-7-Phenyl-7H-benzo[c]fluorene (2g)

Conditions: hexane/2-propanol/ethanol = 99.6:0.2:0.2

Flow rate = 1.0 mL/min,  $\lambda = 272$  nm, Chiral IB-3

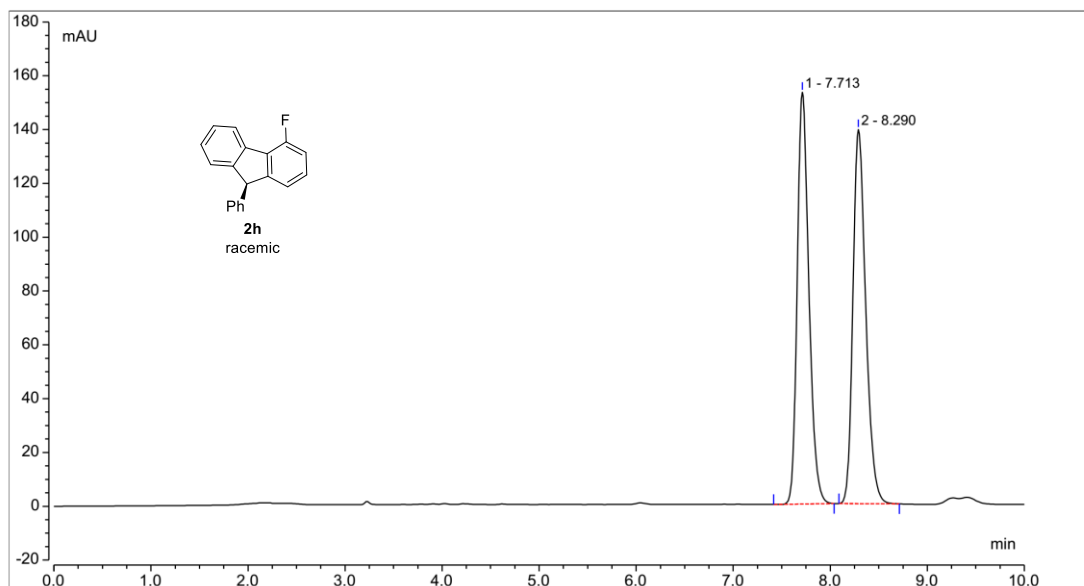

Supplementary Figure 92. HPLC trace for 4-Fluoro-9-phenyl-9H-fluorene (*rac*-2h)

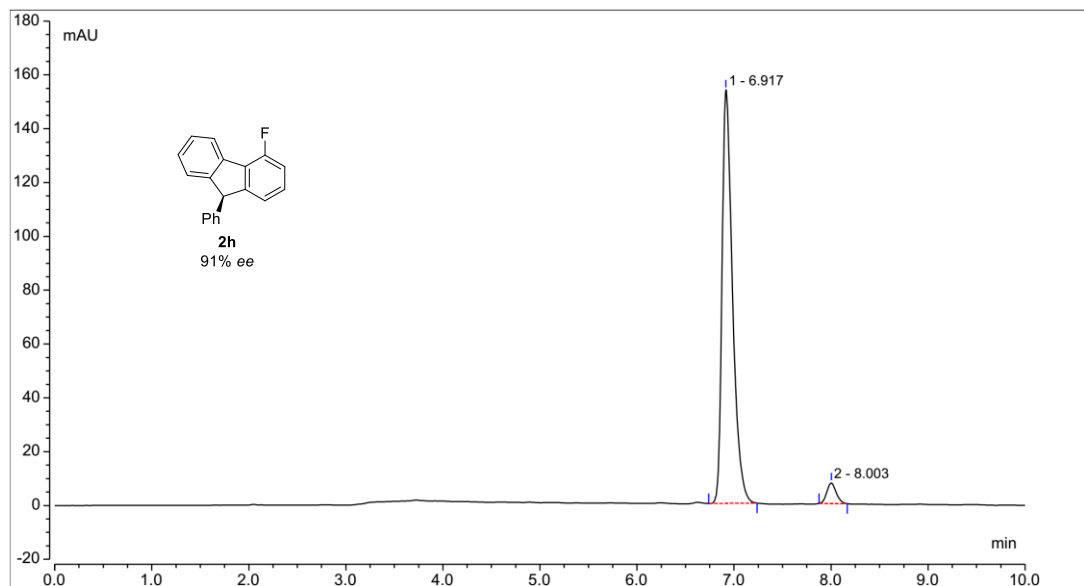

Supplementary Figure 93. HPLC trace for (*S*)-4-Fluoro-9-phenyl-9H-fluorene (2h)

Conditions: hexane/2-propanol = 100:0

Flow rate = 1.0 mL/min,  $\lambda = 272$  nm, Chiral IB-3

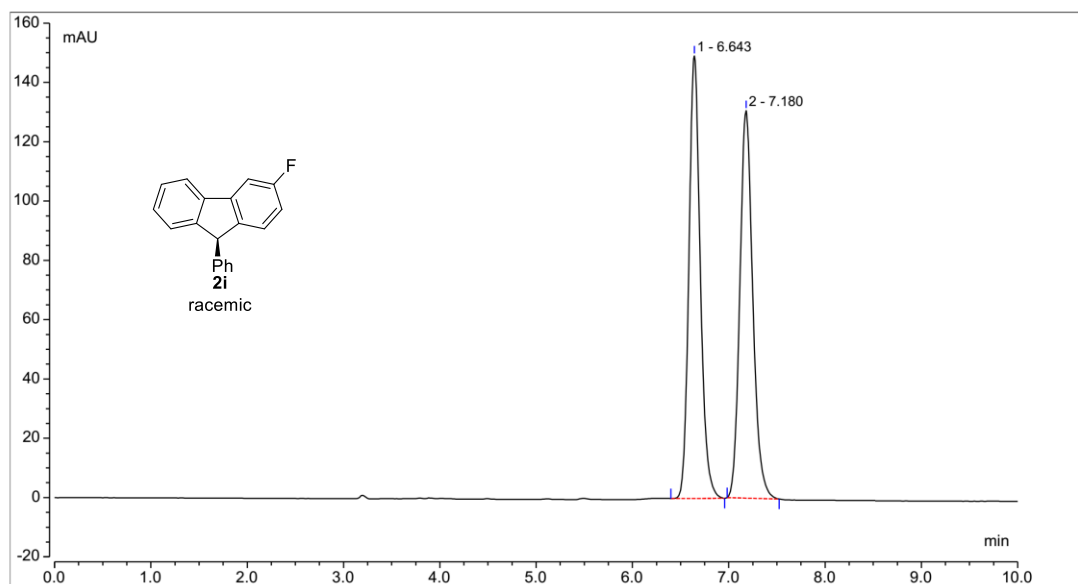

Supplementary Figure 94. HPLC trace for 3-Fluoro-9-phenyl-9H-fluorene (*rac*-2i)

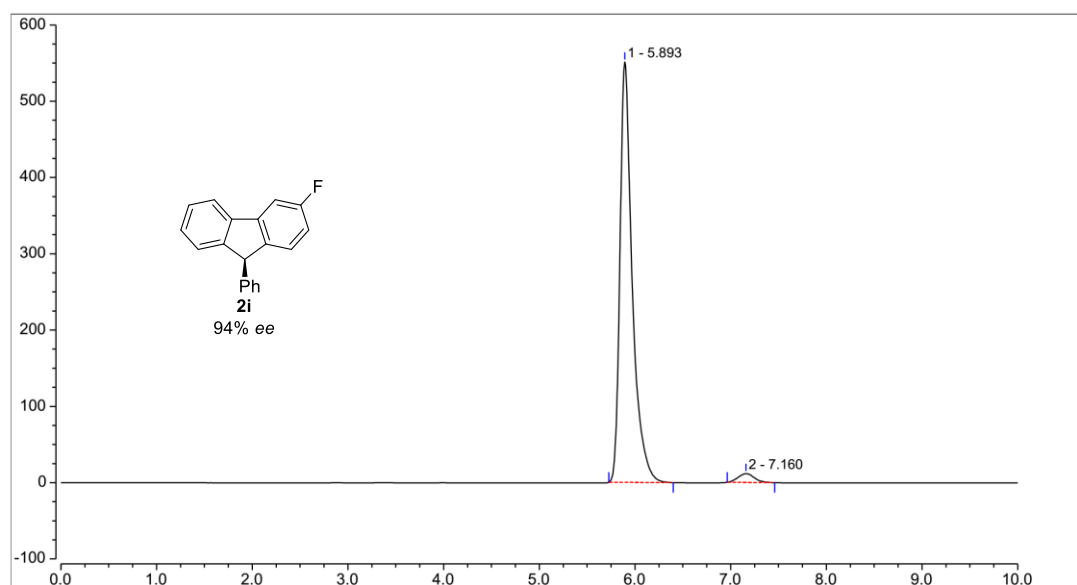

Supplementary Figure 95. HPLC trace for (*S*)-3-Fluoro-9-phenyl-9H-fluorene (2i)

Conditions: hexane/2-propanol/ethanol = 99:0.5:0.5

Flow rate = 1.0 mL/min,  $\lambda = 272$  nm, Chiral IB-3

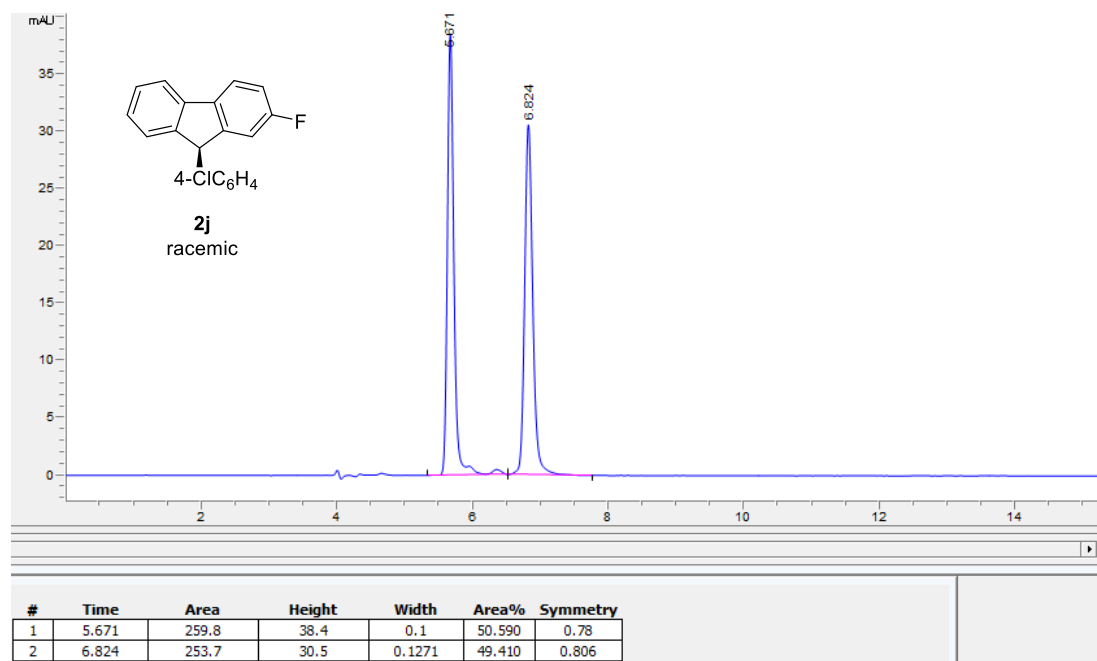

Supplementary Figure 96. HPLC trace for 9-(4-Chlorophenyl)-2-fluoro-9H-fluorene (*rac*-2j)

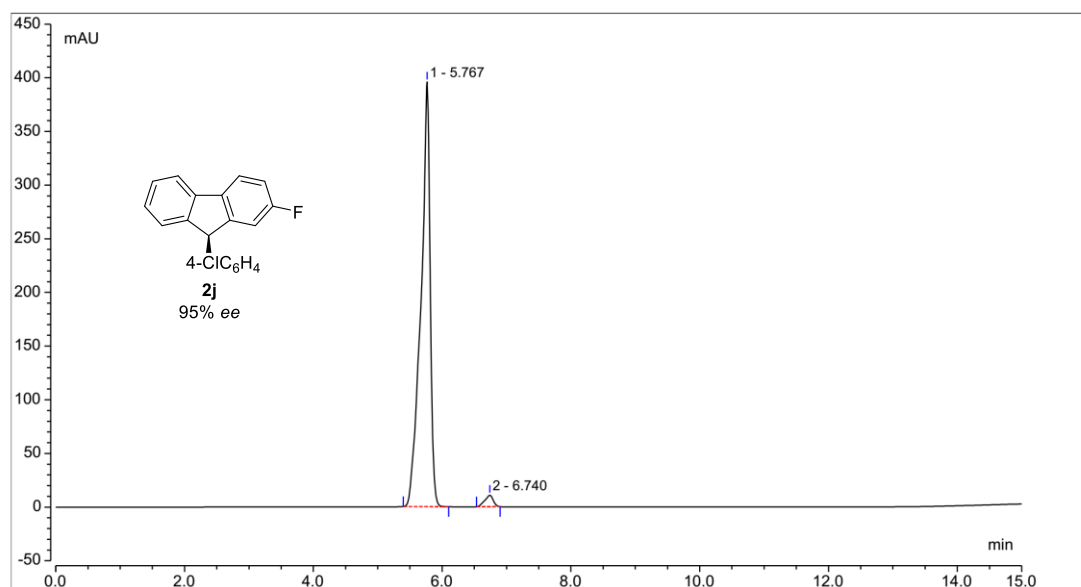

Supplementary Figure 97. HPLC trace for (*S*)-9-(4-Chlorophenyl)-2-fluoro-9H-fluorene (2j)

Conditions: hexane/2-propanol/ethanol = 99.2:0.4:0.4

Flow rate = 1.0 mL/min,  $\lambda = 272$  nm, Chiral IB-3

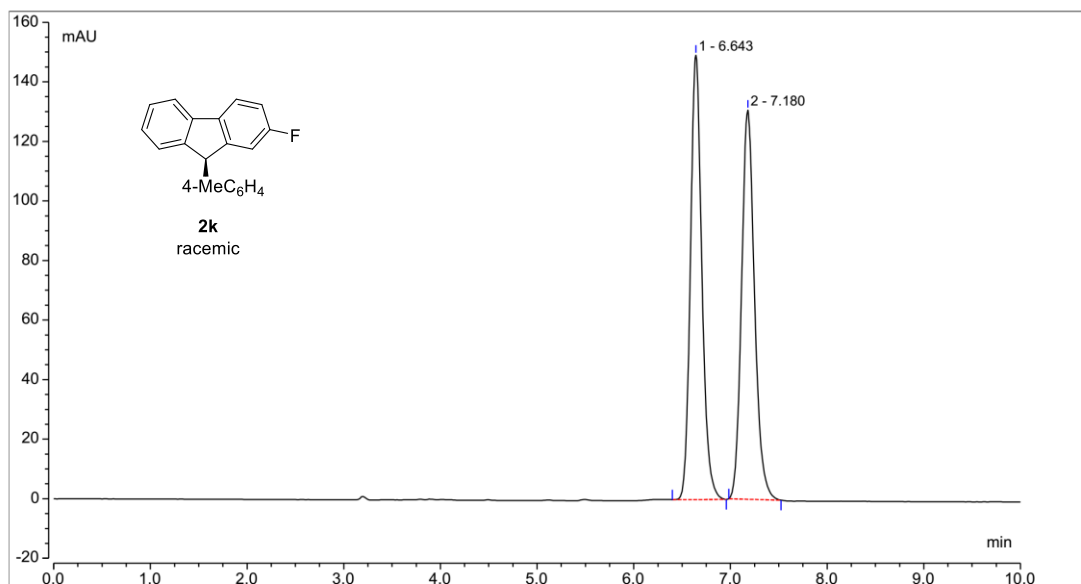

| Entry | RT min | Area mAU*min | Height mAU | % Area % | % Height % |
|-------|--------|--------------|------------|----------|------------|
| 1     | 6.643  | 20.456       | 149.203    | 50.16    | 53.31      |
| 2     | 7.180  | 20.329       | 130.656    | 49.84    | 46.69      |

Supplementary Figure 98. HPLC trace for 2-Fluoro-9-(*p*-tolyl)-9H-fluorene (*rac*-2k)

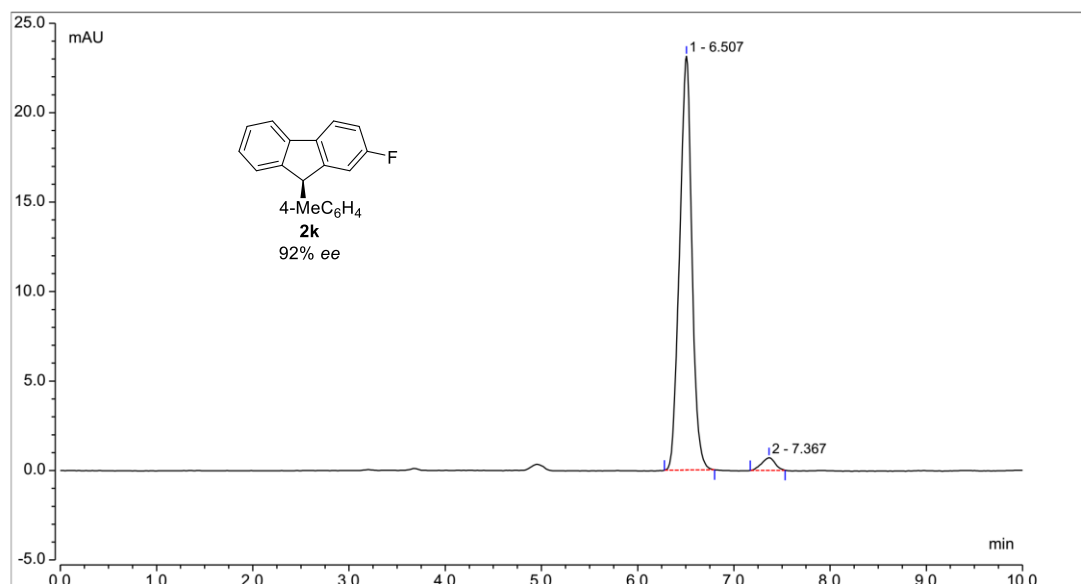

| Entry | RT min | Area mAU*min | Height mAU | % Area % | % Height % |
|-------|--------|--------------|------------|----------|------------|
| 1     | 6.507  | 3.411        | 23.124     | 96.78    | 97.04      |
| 2     | 7.367  | 0.114        | 0.706      | 3.22     | 2.96       |

Supplementary Figure 99. HPLC trace for 2-Fluoro-9-(*p*-tolyl)-9H-fluorene (2k)

Conditions: hexane/2-propanol/ethanol= 97.5:1.25:1.25

Flow rate = 1.0 mL/min,  $\lambda = 272$  nm, Chiral IB-3

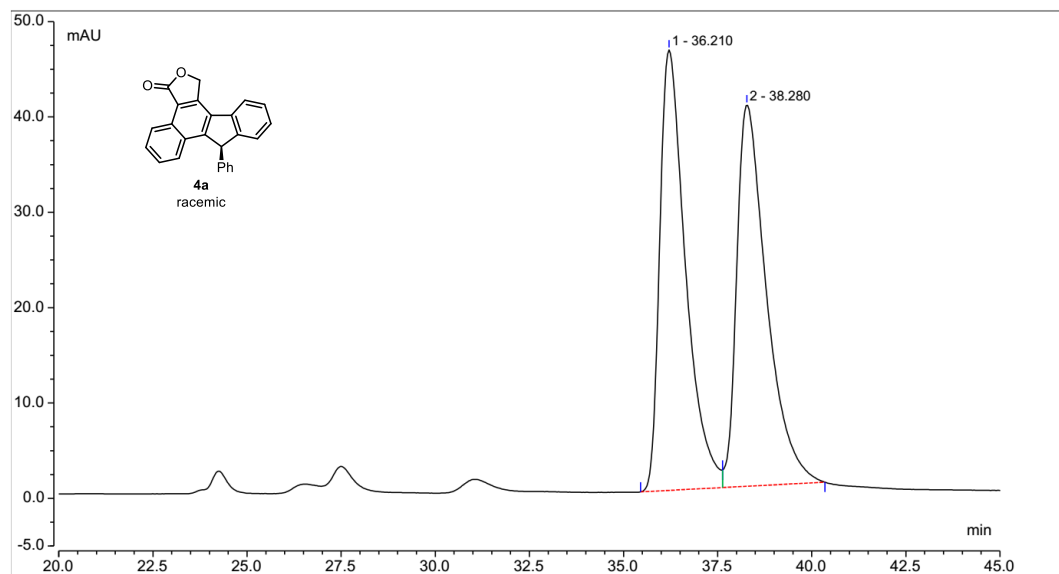

| Entry | RT min | Area mAU*min | Height mAU | % Area % | % Height % |
|-------|--------|--------------|------------|----------|------------|
| 1     | 36.210 | 36.731       | 46.183     | 49.98    | 53.58      |
| 2     | 38.280 | 36.757       | 40.009     | 50.02    | 46.42      |

**Supplementary Figure 100. HPLC trace for 8-Phenyl-1*H*-benzo[1,2]fluoreno[3,4-*c*]furan-3(8*H*)-one (*rac*-4a)**

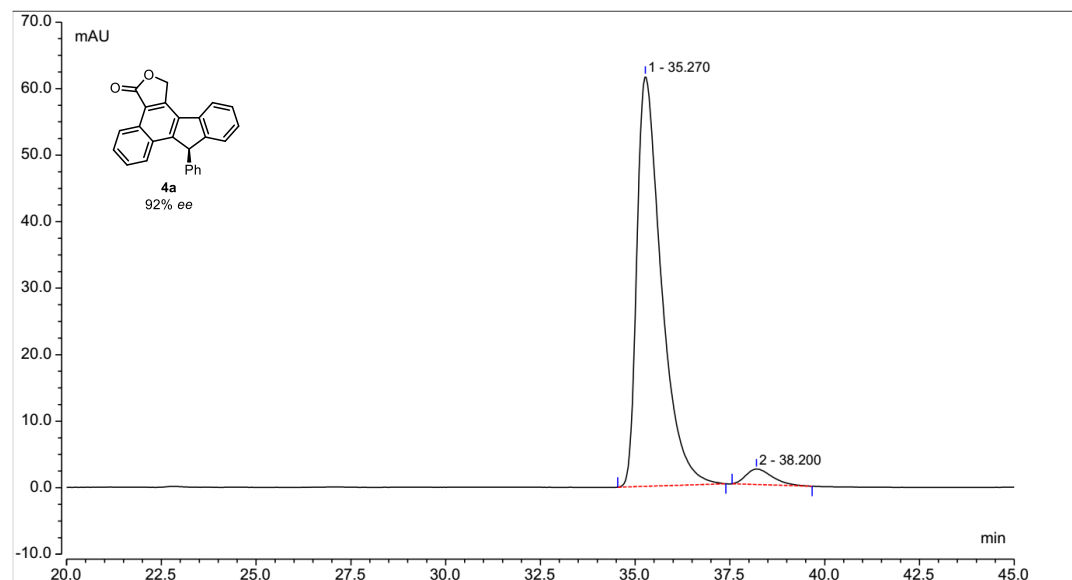

| Entry | RT min | Area mAU*min | Height mAU | % Area % | % Height % |
|-------|--------|--------------|------------|----------|------------|
| 1     | 35.270 | 46.075       | 61.649     | 96.09    | 96.36      |
| 2     | 38.200 | 1.877        | 2.332      | 3.91     | 3.64       |

**Supplementary Figure 101. HPLC trace for (*R*)-8-Phenyl-1*H*-benzo[1,2]fluoreno[3,4-*c*]furan-3(8*H*)-one (4a)**

Conditions: hexane/2-propanol/ethanol= 97.5:1.25:1.25

Flow rate = 1.0 mL/min,  $\lambda = 272$  nm, Chiral IB-3

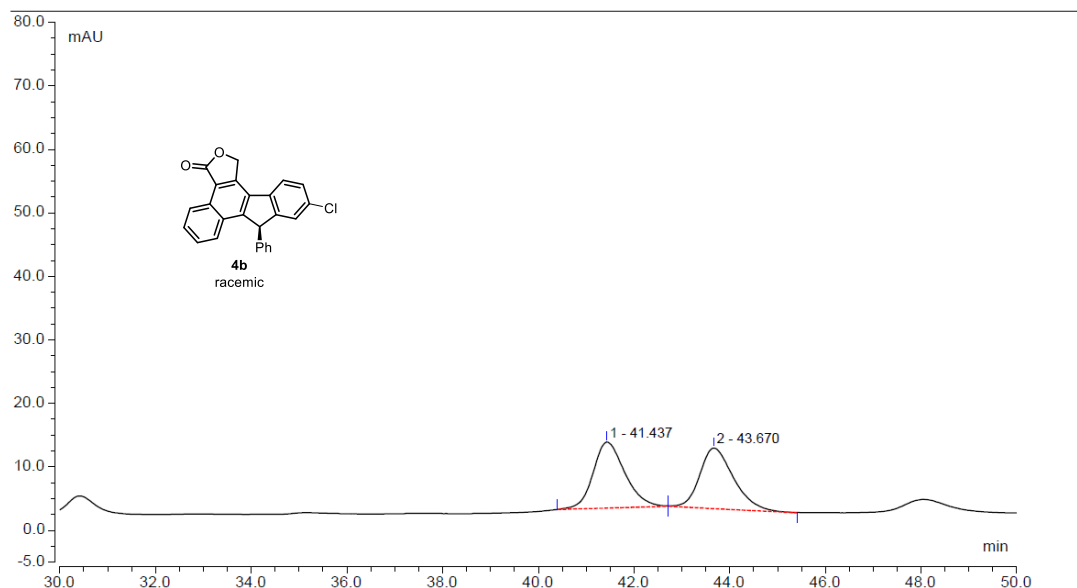

| Entry | RT min | Area mAU*min | Height mAU | % Area % | % Height % |
|-------|--------|--------------|------------|----------|------------|
| 1     | 41.437 | 8.003        | 10.389     | 50.50    | 52.12      |
| 2     | 43.670 | 7.843        | 9.545      | 49.50    | 47.88      |

**Supplementary Figure 102. HPLC trace for 0-Chloro-8-phenyl-1H-benzo[1,2]fluoreno[3,4-c]furan-3(8H)-one (rac-4b)**

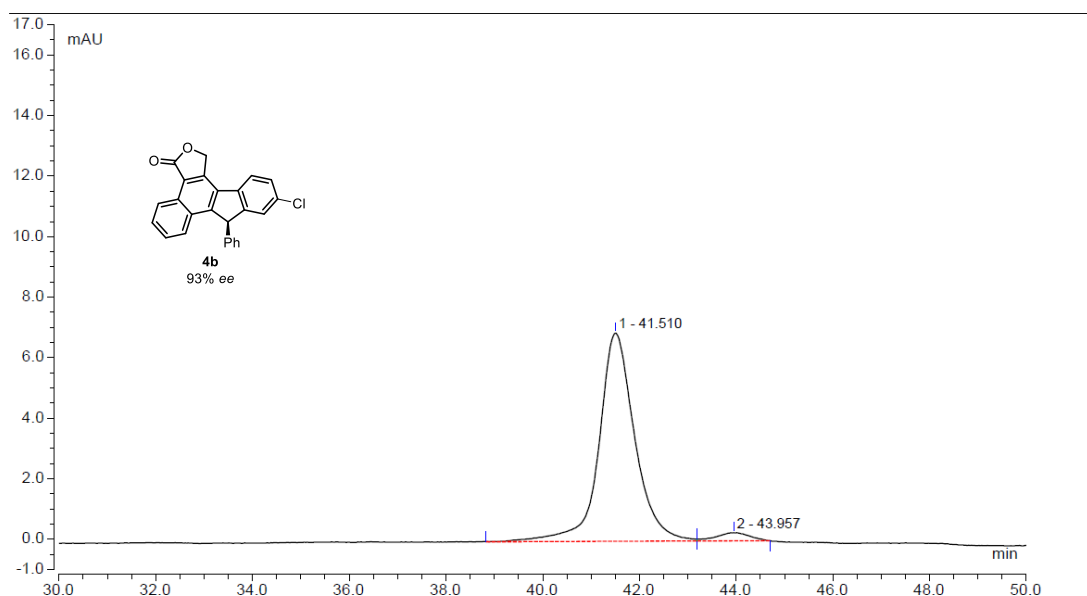

| Entry | RT min | Area mAU*min | Height mAU | % Area % | % Height % |
|-------|--------|--------------|------------|----------|------------|
| 1     | 41.510 | 5.914        | 6.875      | 96.52    | 96.24      |
| 2     | 43.957 | 0.213        | 0.269      | 3.48     | 3.76       |

**Supplementary Figure 103. HPLC trace for (R)-10-Chloro-8-phenyl-1H-benzo[1,2]fluoreno[3,4-c]furan-3(8H)-one (4b)**



Conditions: hexane/2-propanol = 92:08

Flow rate = 1.0 mL/min,  $\lambda = 272$  nm, Chiral IA-3

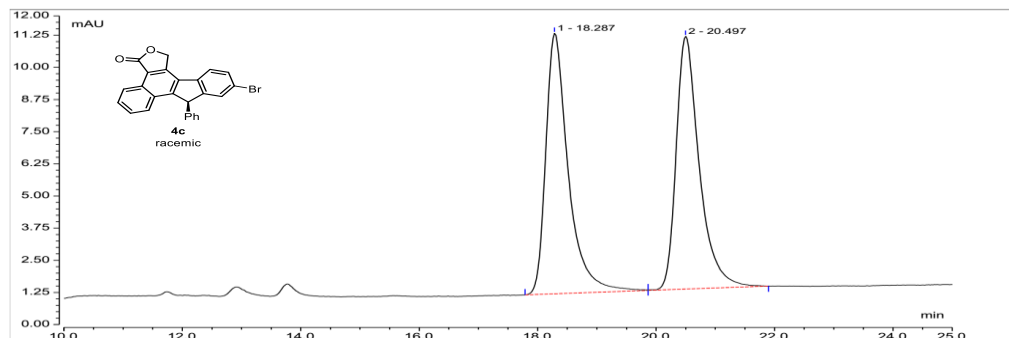

Supplementary Figure 104. HPLC trace for 10-Bromo-8-phenyl-1H-benzo[1,2]fluoreno[3,4-c]furan-3(8H)-one (*rac*-4c)

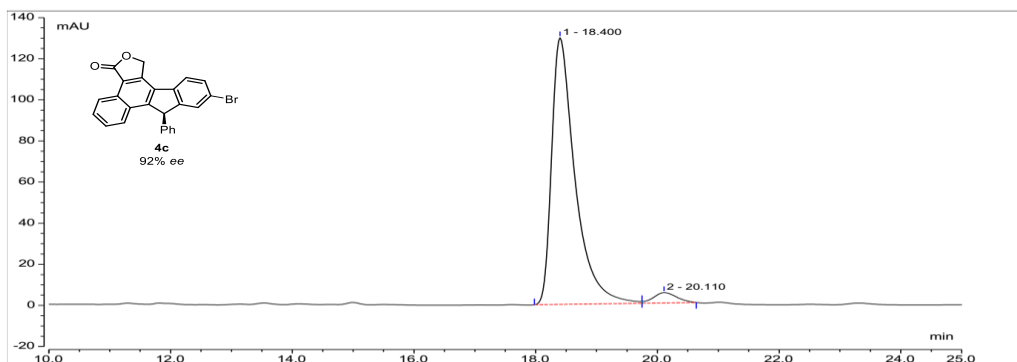

Supplementary Figure 105. HPLC trace for (*R*)-10-Bromo-8-phenyl-1H-benzo[1,2]fluoreno[3,4-c]furan-3(8H)-one (4c)

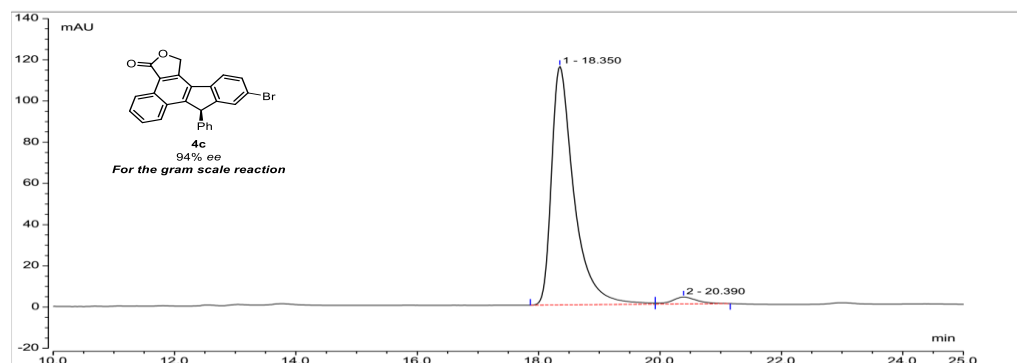

Supplementary Figure 106. HPLC trace for (*R*)-10-Bromo-8-phenyl-1H-benzo[1,2]fluoreno[3,4-c]furan-3(8H)-one (4c) (gram scale)

Conditions: hexane/2-propanol = 95:05

Flow rate = 1.0 mL/min,  $\lambda = 272$  nm, Chiral IA-3

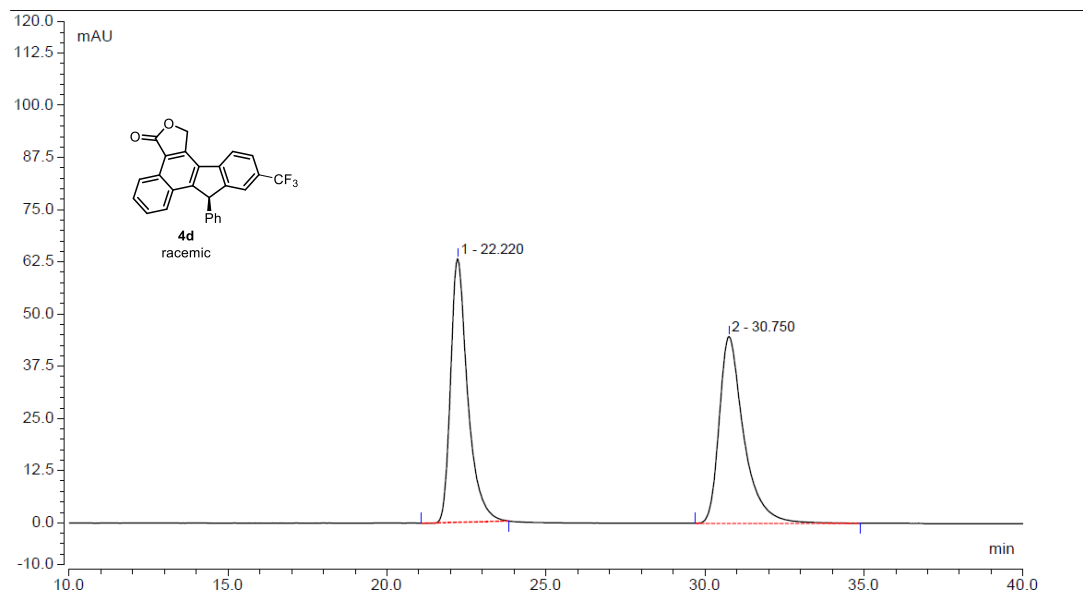

| Entry | RT min | Area mAU*min | Height mAU | % Area % | % Height % |
|-------|--------|--------------|------------|----------|------------|
| 1     | 22.220 | 39.240       | 63.172     | 49.42    | 58.52      |
| 2     | 30.750 | 40.165       | 44.782     | 50.58    | 41.48      |

**Supplementary Figure 107. HPLC trace for 8-Phenyl-10-(trifluoromethyl)-1*H*-benzo[1,2]fluoreno[3,4-*c*]furan-3(8*H*)-one (*rac*-4d)**

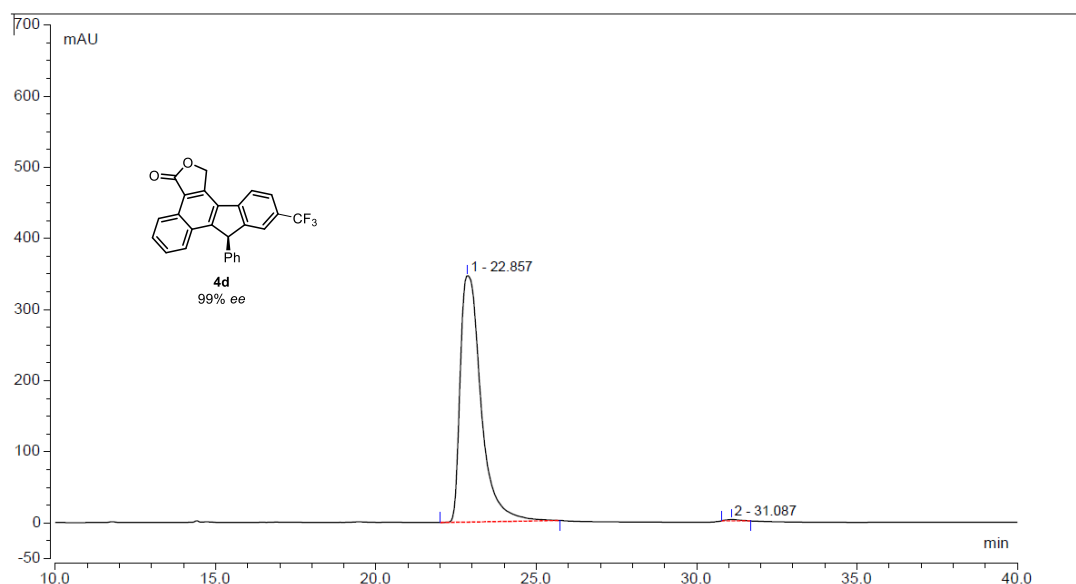

| Entry | RT min | Area mAU*min | Height mAU | % Area % | % Height % |
|-------|--------|--------------|------------|----------|------------|
| 1     | 22.857 | 260.500      | 346.368    | 99.65    | 99.49      |
| 2     | 31.087 | 0.925        | 1.787      | 0.35     | 0.51       |

**Supplementary Figure 108. HPLC trace for (*R*)-8-Phenyl-10-(trifluoromethyl)-1*H*-benzo[1,2]fluoreno[3,4-*c*]furan-3(8*H*)-one (4d)**

Conditions: hexane/2-propanol = 96:04

Flow rate = 1.0 mL/min,  $\lambda = 272$  nm, Chiral IA-3

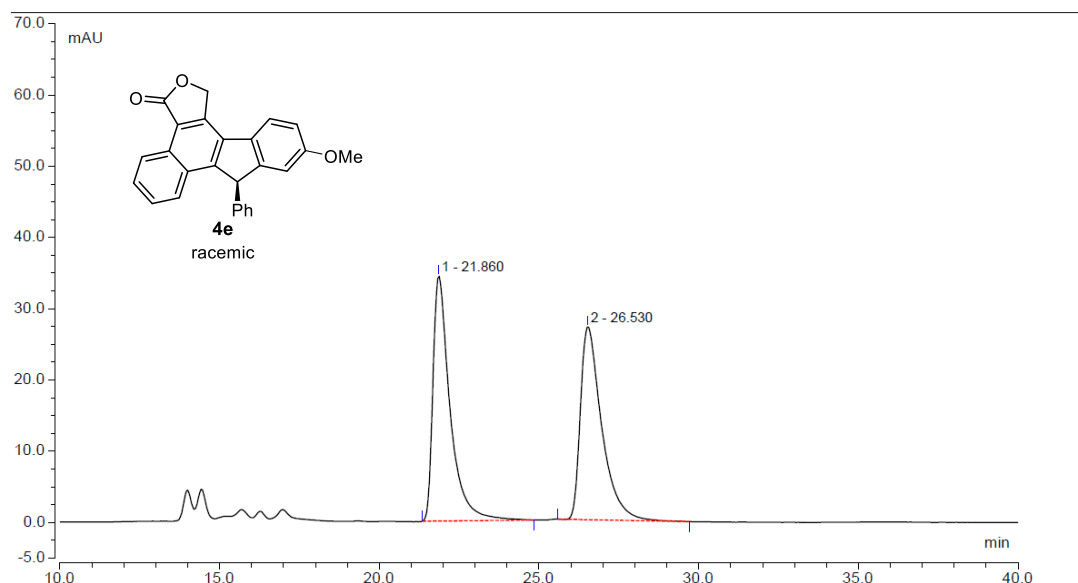

**Supplementary Figure 109. HPLC trace for 10-Methoxy-8-phenyl-1H-benzo[1,2]fluoreno[3,4-c]furan-3(8H)-one (rac-4e)**

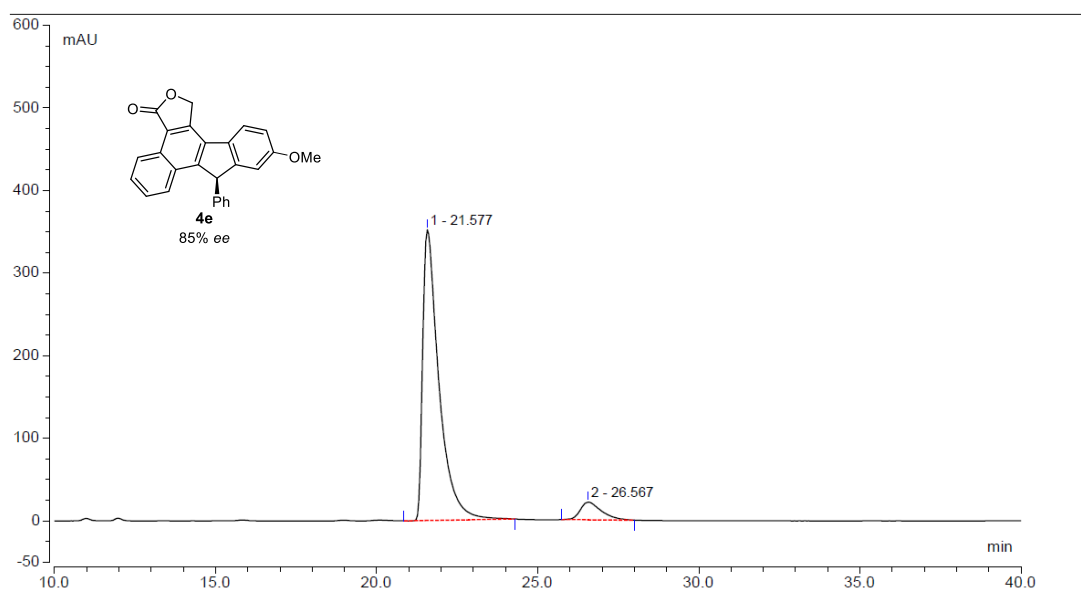

**Supplementary Figure 110. HPLC trace for (R)-10-Methoxy-8-phenyl-1H-benzo[1,2]fluoreno[3,4-c]furan-3(8H)-one (4e)**

Conditions: hexane/2-propanol = 93:07

Flow rate = 0.5 mL/min,  $\lambda = 272$  nm, Chiral IA-3

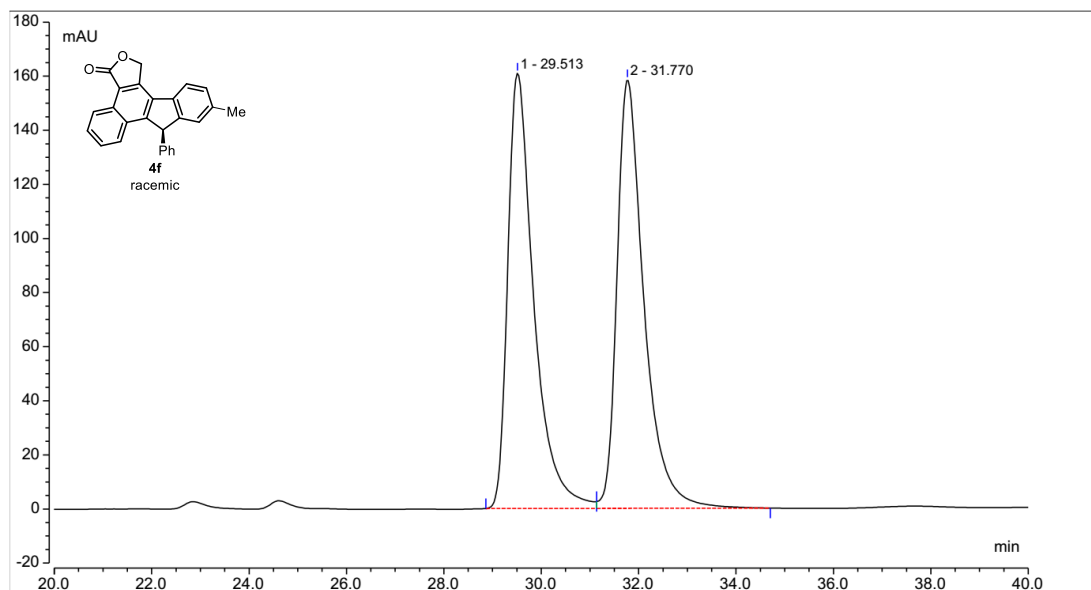

**Supplementary Figure 111. HPLC trace for (*R*)-10-methyl-8-phenyl-1*H*-benzo[1,2]fluoreno[3,4-*c*]furan-3(8*H*)-one (*rac*-4f)**

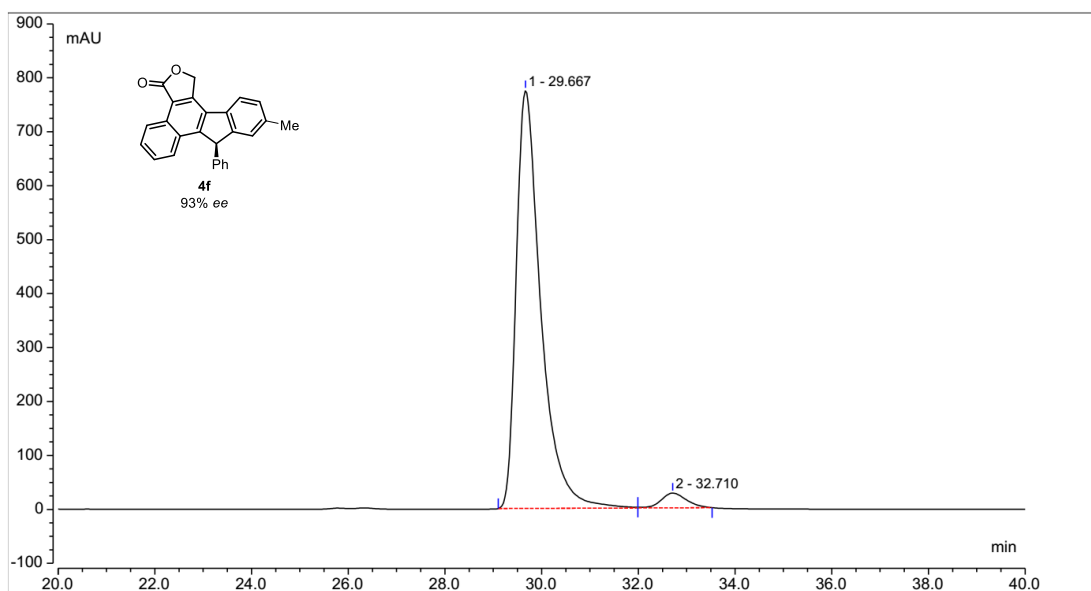

**Supplementary Figure 112. HPLC trace for (*R*)-10-methyl-8-phenyl-1*H*-benzo[1,2]fluoreno[3,4-*c*]furan-3(8*H*)-one (4f)**

Conditions: hexane/2-propanol /ethanol= 98.5:0.75:0.75

Flow rate = 1.0 mL/min,  $\lambda$  = 272 nm, Chiral IB-3

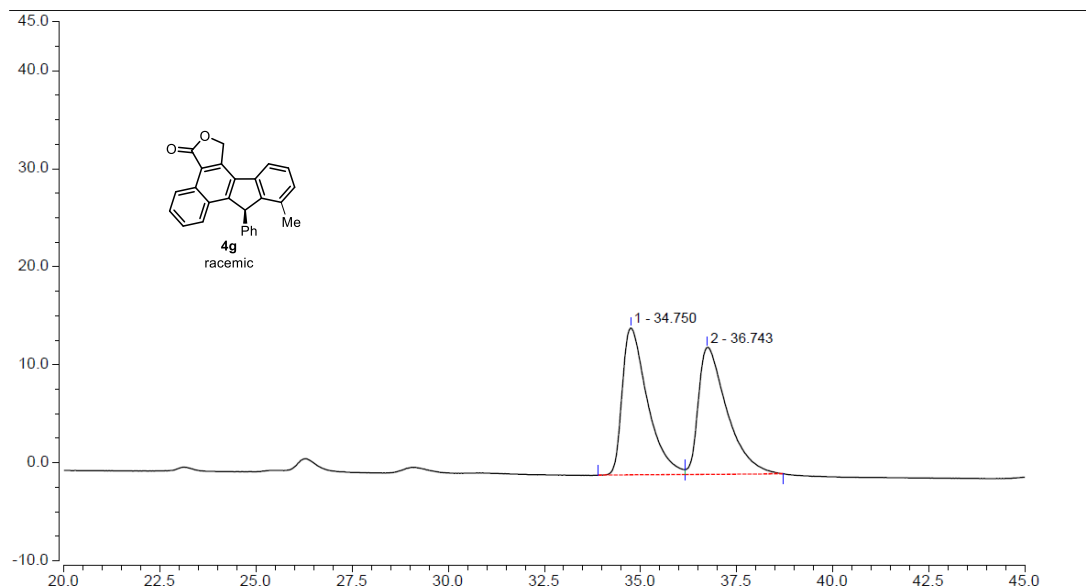

| Entry | RT min | Area mAU*min | Height mAU | % Area % | % Height % |
|-------|--------|--------------|------------|----------|------------|
| 1     | 34.750 | 11.412       | 14.997     | 50.40    | 53.65      |
| 2     | 36.743 | 11.229       | 12.958     | 49.60    | 46.35      |

**Supplementary Figure 113. HPLC trace for (*R*)-9-Methyl-8-phenyl-1*H*-benzo[1,2]fluoreno[3,4-*c*]furan-3(8*H*)-one (*rac*-4g)**

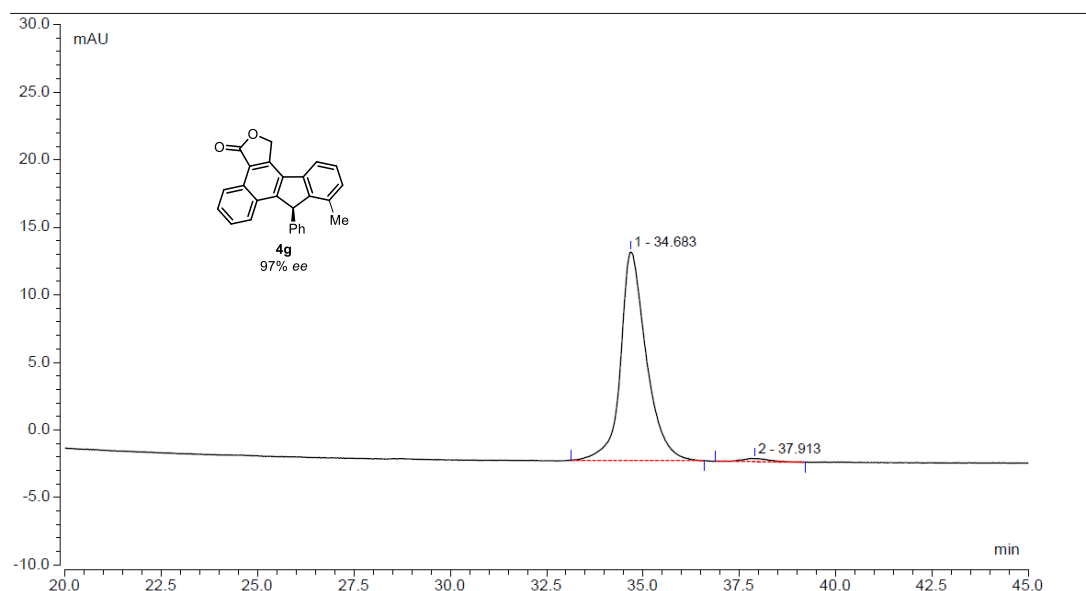

| Entry | RT min | Area mAU*min | Height mAU | % Area % | % Height % |
|-------|--------|--------------|------------|----------|------------|
| 1     | 34.683 | 11.985       | 15.463     | 98.50    | 98.40      |
| 2     | 37.913 | 0.182        | 0.252      | 1.50     | 1.60       |

**Supplementary Figure 114. HPLC trace for (*R*)-9-Methyl-8-phenyl-1*H*-benzo[1,2]fluoreno[3,4-*c*]furan-3(8*H*)-one (4g)**

Conditions: hexane/2-propanol /ethanol= 97.5:1.25:1.25

Flow rate = 1.0 mL/min,  $\lambda = 272$  nm, Chiral IB-3

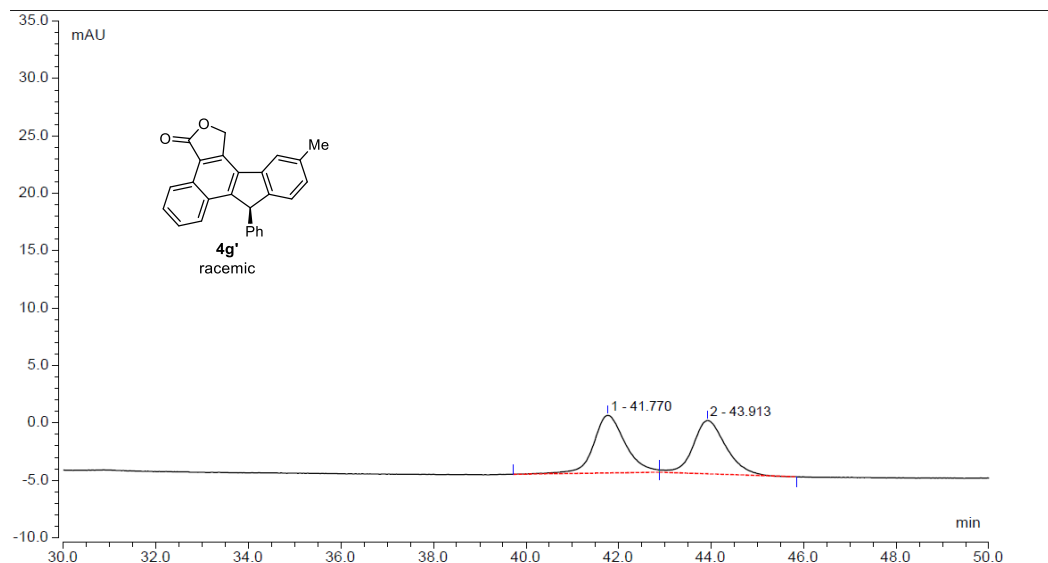

| Entry | RT min | Area mAU*min | Height mAU | % Area % | % Height % |
|-------|--------|--------------|------------|----------|------------|
| 1     | 41.770 | 3.964        | 5.026      | 50.97    | 51.98      |
| 2     | 43.913 | 3.812        | 4.643      | 49.03    | 48.02      |

**Supplementary Figure 115. HPLC trace for 12-Methyl-8-phenyl-1H-benzo[1,2]fluoreno[3,4-c]furan-3(8H)-one (*rac*-4g')**

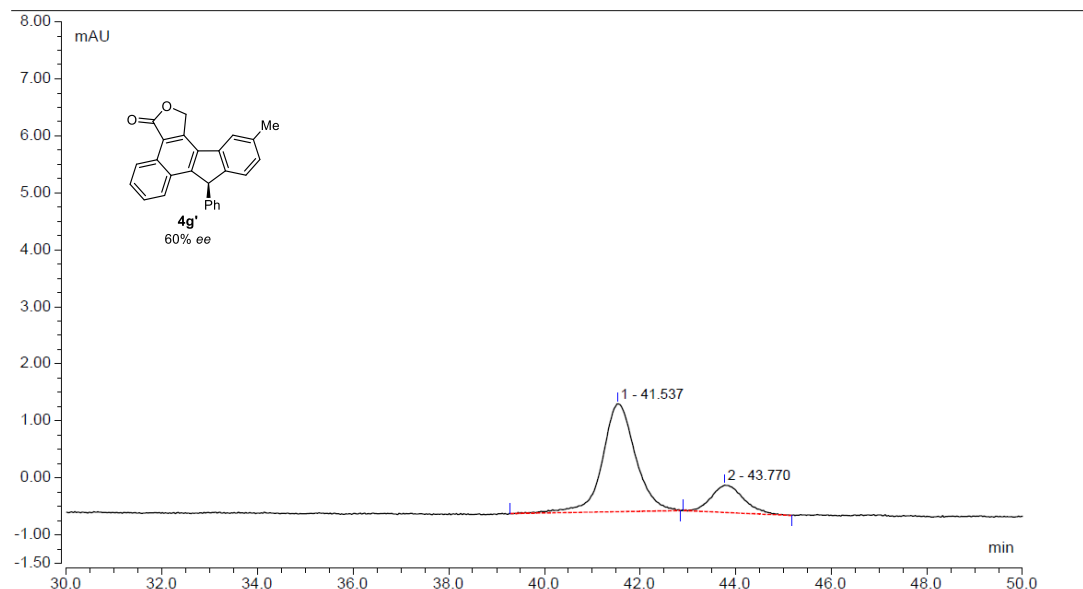

| Entry | RT min | Area mAU*min | Height mAU | % Area % | % Height % |
|-------|--------|--------------|------------|----------|------------|
| 1     | 41.537 | 1.518        | 1.900      | 80.09    | 79.84      |
| 2     | 43.770 | 0.378        | 0.480      | 19.91    | 20.16      |

**Supplementary Figure 116. HPLC trace for (*R*)-12-Methyl-8-phenyl-1H-benzo[1,2]fluoreno[3,4-c]furan-3(8H)-one (4g')**

Conditions: hexane/2-propanol = 95:05

Flow rate = 1.0 mL/min,  $\lambda = 272$  nm, Chiral IB-3

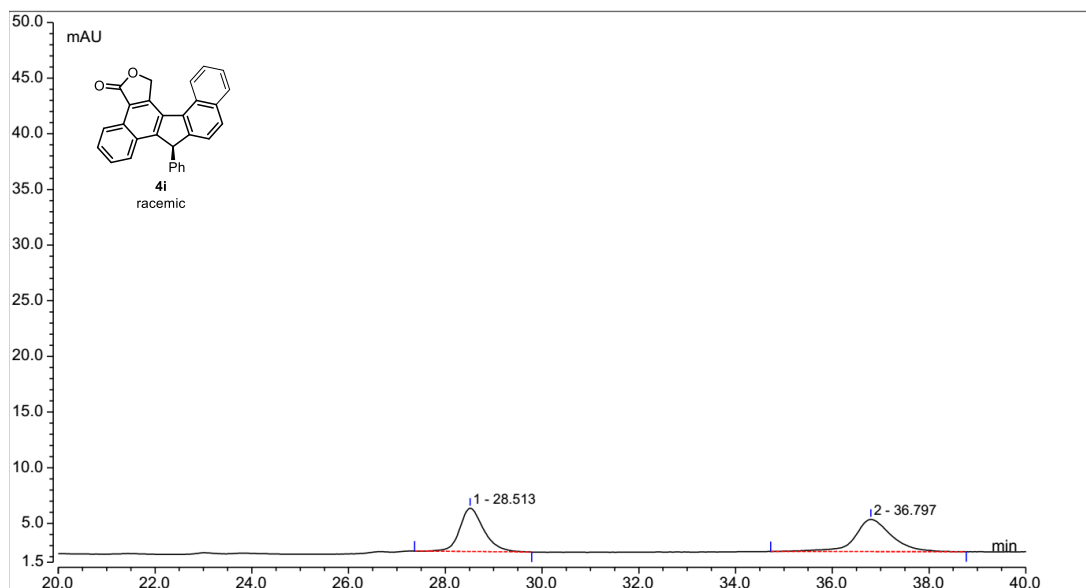

| Entry | RT<br>min | Area<br>mAU*min | Height<br>mAU | % Area<br>% | % Height<br>% |
|-------|-----------|-----------------|---------------|-------------|---------------|
| 1     | 28.513    | 2.240           | 3.888         | 46.68       | 57.28         |
| 2     | 36.797    | 2.558           | 2.900         | 53.32       | 42.72         |

**Supplementary Figure 117. HPLC trace for 8-Phenyl-1*H*-dibenzo[1,2:5,6]fluoreno[3,4-*c*]furan-3(8*H*)-one (*rac*-4i)**

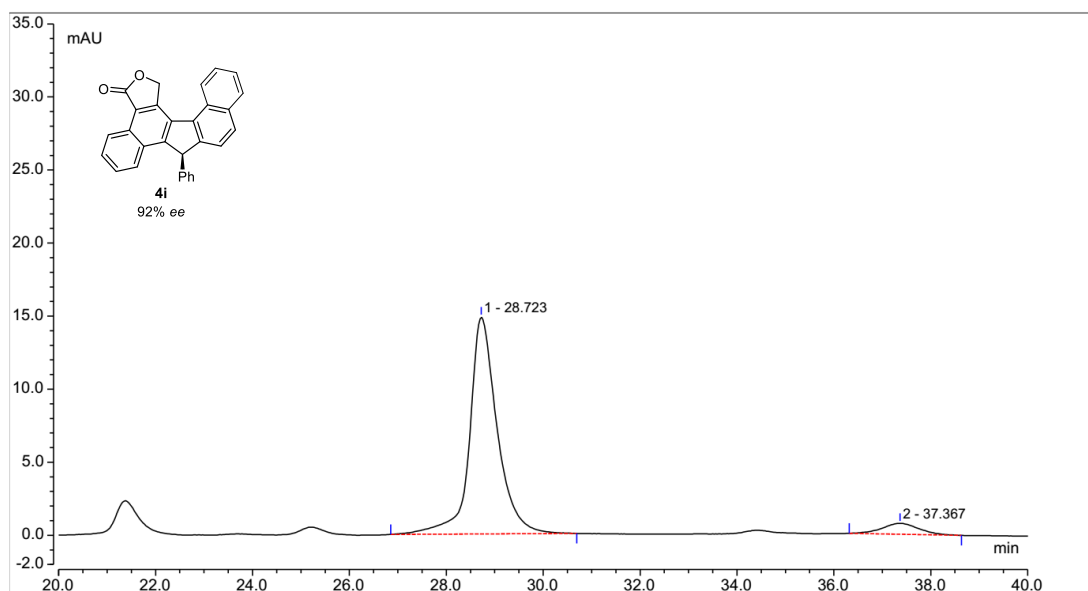

| Entry | RT<br>min | Area<br>mAU*min | Height<br>mAU | % Area<br>% | % Height<br>% |
|-------|-----------|-----------------|---------------|-------------|---------------|
| 1     | 28.723    | 9.809           | 14.834        | 96.24       | 95.22         |
| 2     | 37.367    | 0.655           | 0.745         | 3.76        | 4.78          |

**Supplementary Figure 118. HPLC trace for (*R*)-8-Phenyl-1*H*-dibenzo[1,2:5,6]Fluoreno [3,4-*c*]furan-3(8*H*)-one (4i)**

Conditions: hexane/2-propanol = 96:04

Flow rate = 1.0 mL/min,  $\lambda = 272$  nm, Chiral IA-3

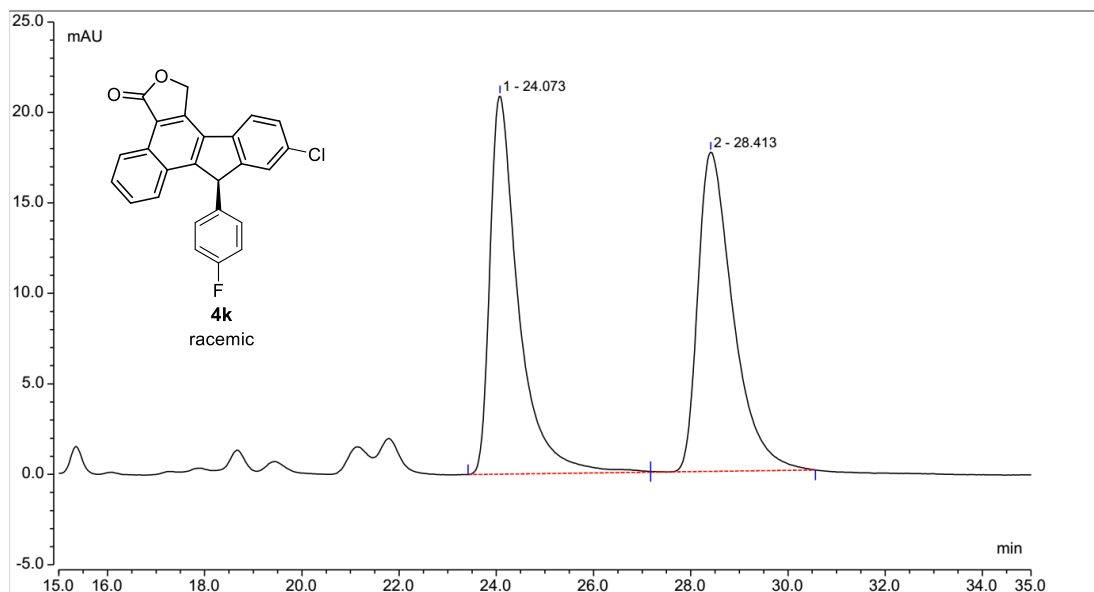

| Entry | RT min | Area mAU*min | Height mAU | % Area % | % Height % |
|-------|--------|--------------|------------|----------|------------|
| 1     | 24.073 | 14.262       | 20.914     | 49.11    | 54.23      |
| 2     | 28.413 | 14.780       | 17.650     | 50.89    | 45.77      |

**Supplementary Figure 119. HPLC trace for 10-Chloro-8-(4-fluorophenyl)-1H-benzo[1,2]fluoreno[3,4-c]furan-3(8H)-one (rac-4k)**

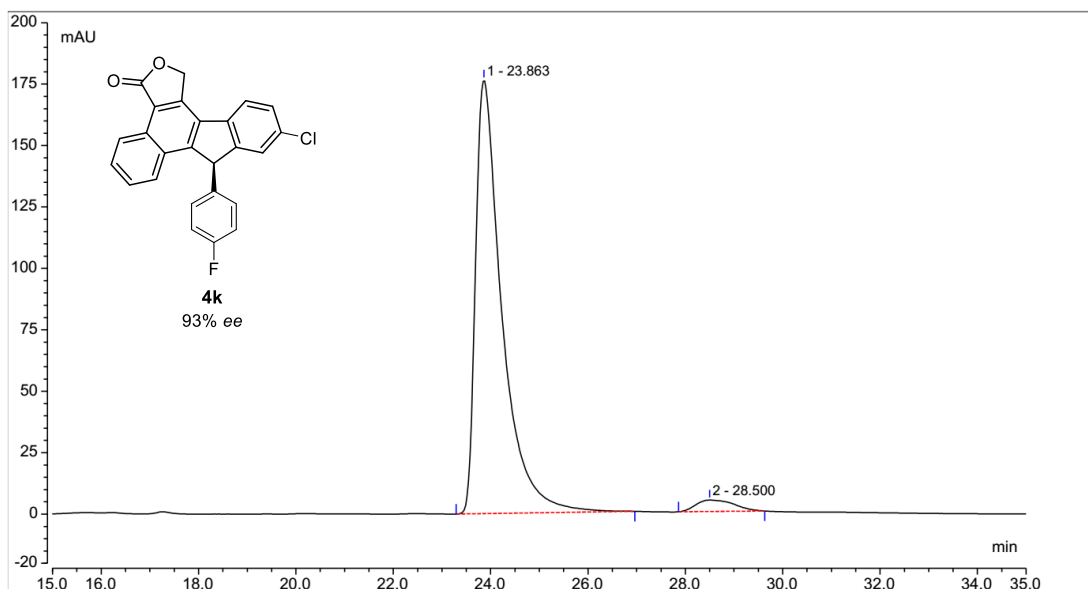

| Entry | RT min | Area mAU*min | Height mAU | % Area % | % Height % |
|-------|--------|--------------|------------|----------|------------|
| 1     | 23.863 | 110.650      | 176.502    | 96.35    | 97.44      |
| 2     | 28.500 | 4.191        | 4.637      | 3.65     | 2.56       |

**Supplementary Figure 120. HPLC trace for (R)-10-Chloro-8-(4-fluorophenyl)-1H-benzo[1,2]fluoreno[3,4-c]furan-3(8H)-one (4k)**



Conditions: hexane/2-propanol = 96:04

Flow rate = 1.0 mL/min,  $\lambda = 272$  nm, Chiral IA-3

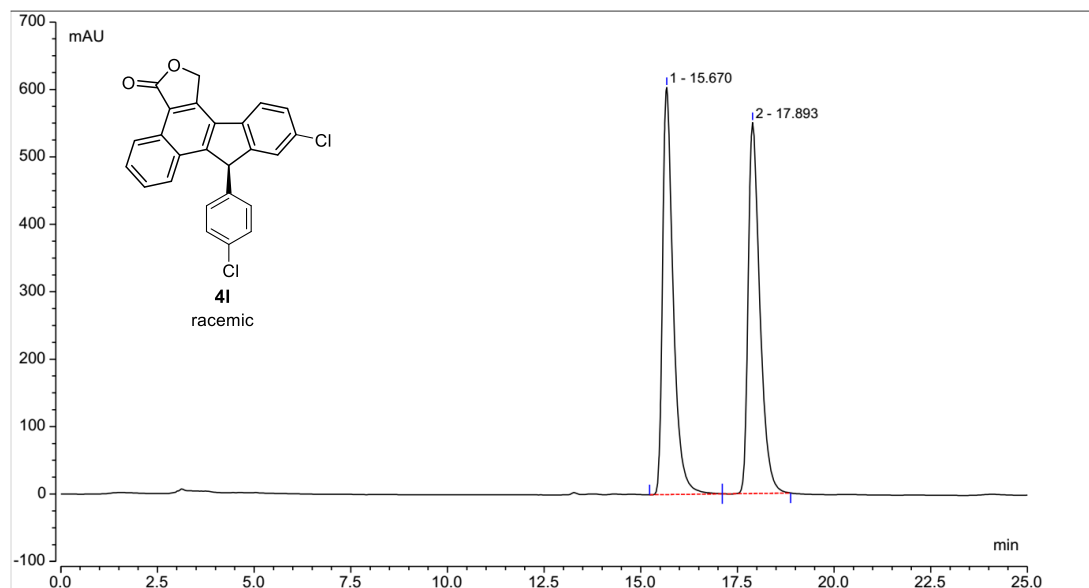

| Entry | RT min | Area mAU*min | Height mAU | % Area % | % Height % |
|-------|--------|--------------|------------|----------|------------|
| 1     | 15.670 | 193.235      | 603.753    | 50.09    | 52.32      |
| 2     | 17.893 | 192.524      | 550.118    | 49.91    | 47.68      |

Supplementary Figure 121. HPLC trace for (*R*)-10-Chloro-8-(4-chlorophenyl)-1*H*-benzo[1,2]fluoreno[3,4-*c*]furan-3(8*H*)-one e (*rac*-4I)

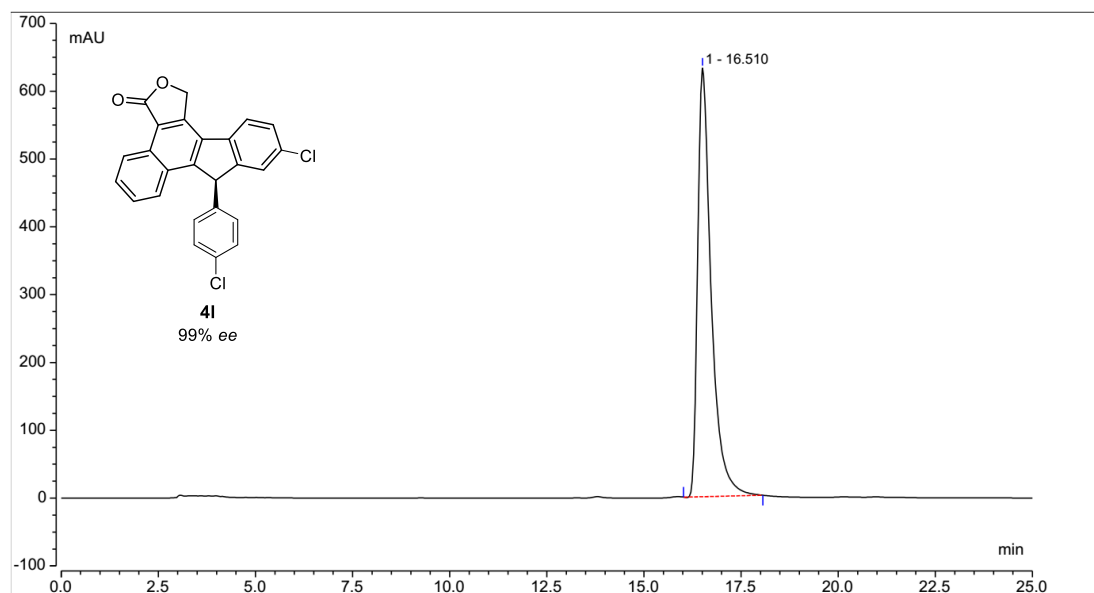

| Entry | RT min | Area mAU*min | Height mAU | % Area % | % Height % |
|-------|--------|--------------|------------|----------|------------|
| 1     | 16.510 | 255.614      | 631.931    | 100.00   | 100.00     |

Supplementary Figure 122. HPLC trace for (*R*)-10-Chloro-8-(4-chlorophenyl)-1*H*-benzo[1,2]fluoreno[3,4-*c*]furan-3(8*H*)-one (4I)

Conditions: hexane/2-propanol = 96:04

Flow rate = 1.0 mL/min,  $\lambda = 272$  nm, Chiral IA-3

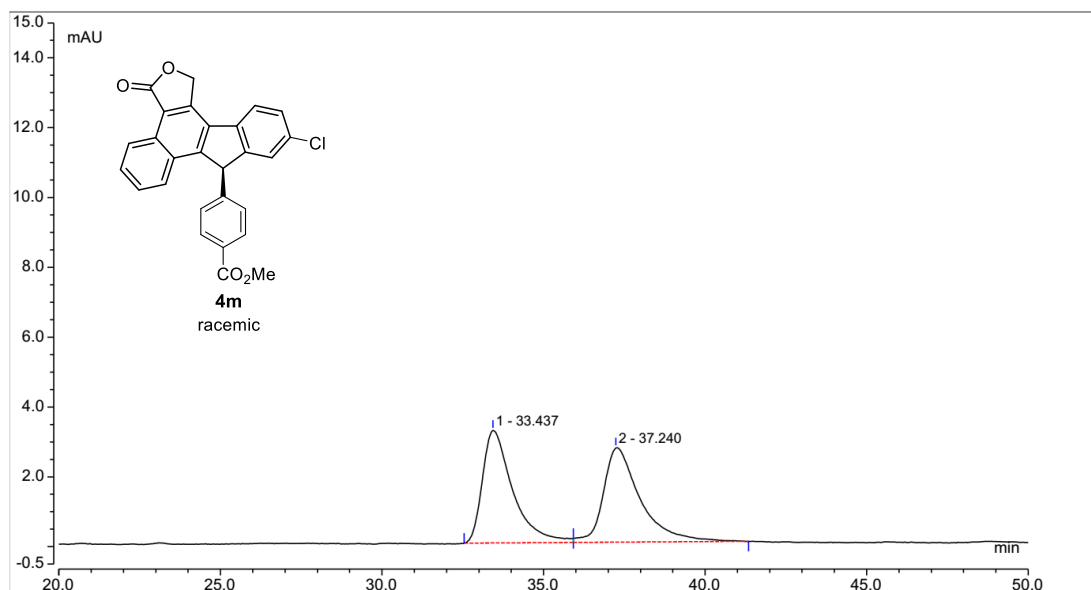

| Entry | RT min | Area mAU*min | Height mAU | % Area % | % Height % |
|-------|--------|--------------|------------|----------|------------|
| 1     | 33.437 | 3.505        | 3.223      | 49.53    | 54.38      |
| 2     | 37.240 | 3.572        | 2.703      | 50.47    | 45.62      |

**Supplementary Figure 123. HPLC trace for (R)-Methyl-4-(10-chloro-3-oxo-3,8-dihydro-1H-benzo[1,2]fluoreno[3,4-c]furan-8-yl)benzoate(rac-4m)**

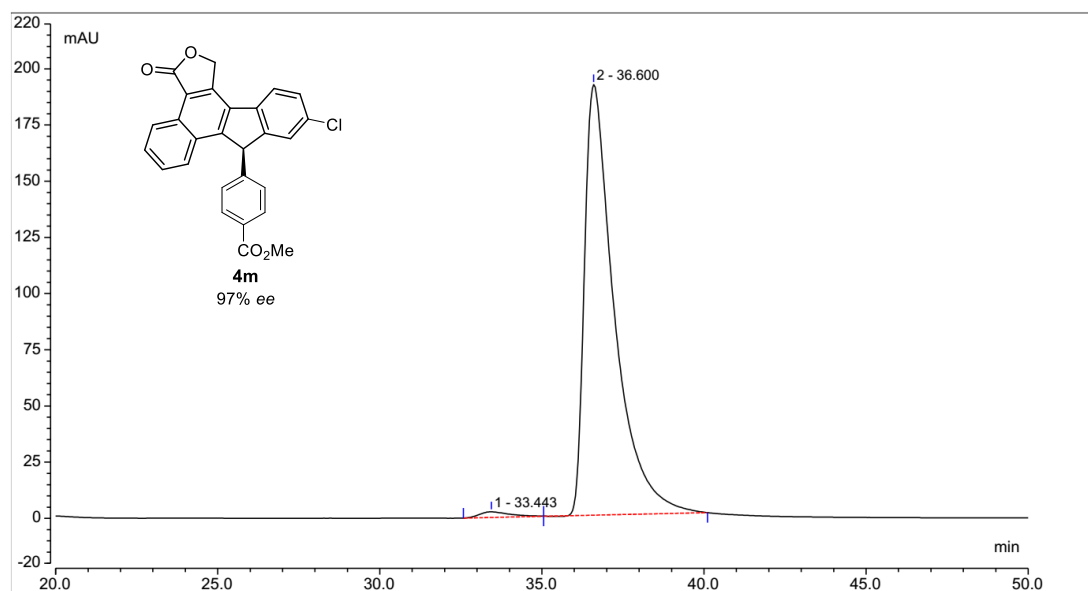

| Entry | RT min | Area mAU*min | Height mAU | % Area % | % Height % |
|-------|--------|--------------|------------|----------|------------|
| 1     | 33.443 | 2.719        | 2.510      | 1.31     | 1.29       |
| 2     | 36.600 | 204.612      | 191.614    | 98.69    | 98.71      |

**Supplementary Figure 124. HPLC trace for (R)-Methyl-4-(10-chloro-3-oxo-3,8-dihydro-1H-benzo[1,2]fluoreno[3,4-c]furan-8-yl)benzoate (4m)**

Conditions: hexane/2-propanol /ethanol= 98.5:0.75:0.75

Flow rate = 1.0 mL/min,  $\lambda = 272$  nm, Chiral IB-3

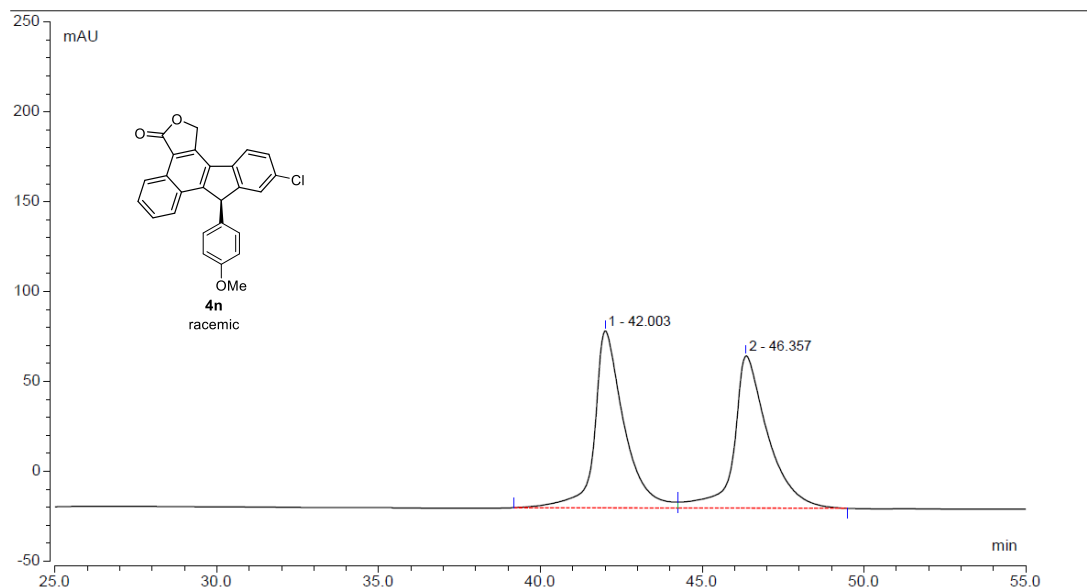

**Supplementary Figure 125. HPLC trace for (*R*)-10-Chloro-8-(4-methoxyphenyl)-1*H*-benzo[1,2]fluoreno[3,4-*c*]furan-3(8*H*)-one (*rac*-4n)**

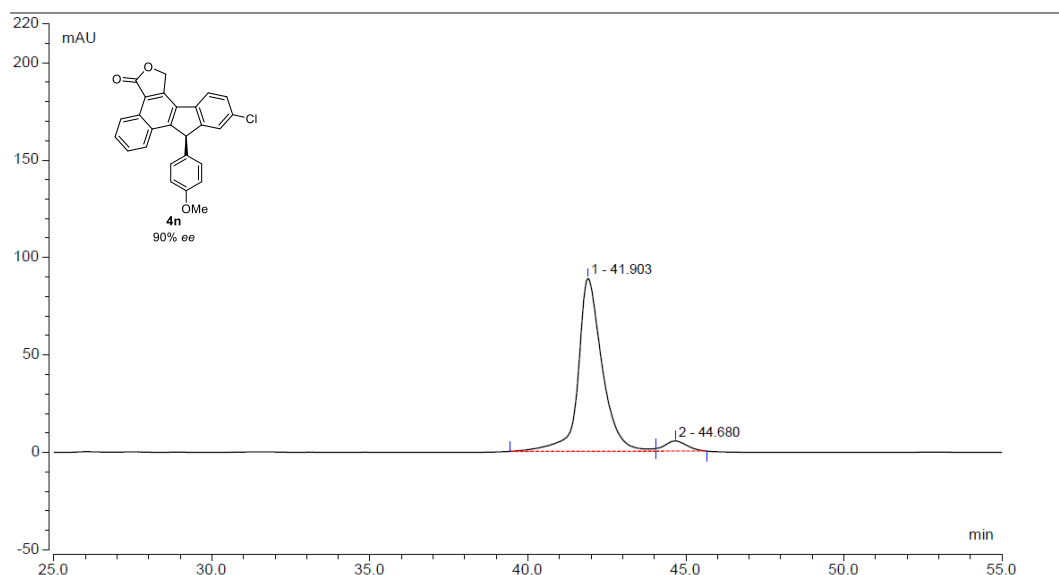

**Supplementary Figure 126. HPLC trace for (*R*)-10-Chloro-8-(4-methoxyphenyl)-1*H*-benzo[1,2]fluoreno[3,4-*c*]furan-3(8*H*)-one (4n)**

Conditions: hexane/2-propanol = 98:1:1

Flow rate = 1.0 mL/min,  $\lambda = 272$  nm, Chiral IA-3

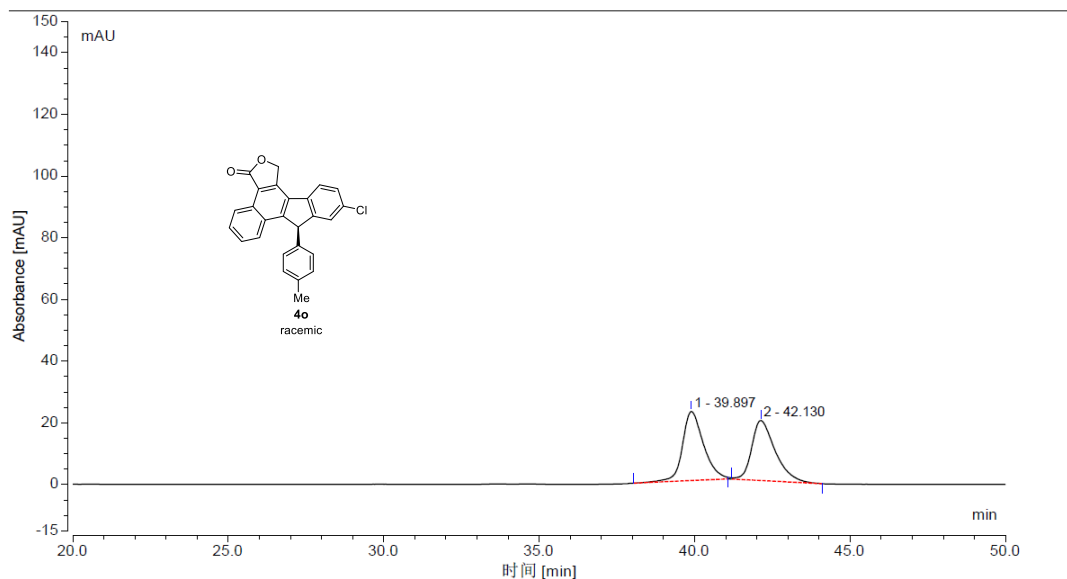

**Supplementary Figure 127. HPLC trace for (R)-10-Chloro-8-(p-tolyl)-1H-benzo[1,2]fluoreno [3,4-c]furan-3(8H)-one (rac-4o)**

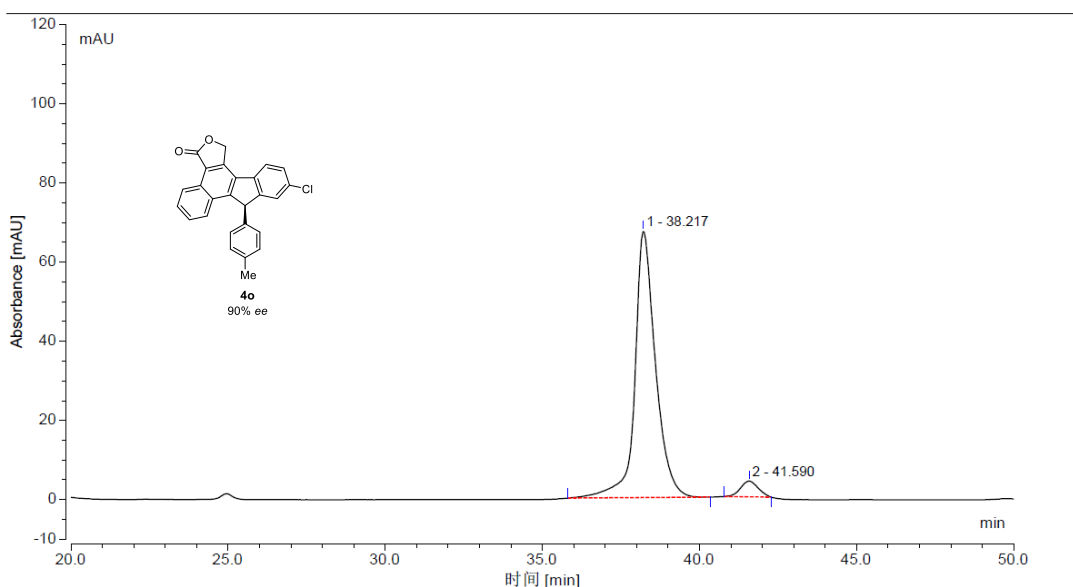

**Supplementary Figure 128. HPLC trace for (R)-10-Chloro-8-(p-tolyl)-1H-benzo[1,2]fluoreno [3,4-c]furan-3(8H)-one (4o)**

Conditions: hexane/2-propanol = 93:07

Flow rate = 1.0 mL/min,  $\lambda = 272$  nm, Chiral IA-3

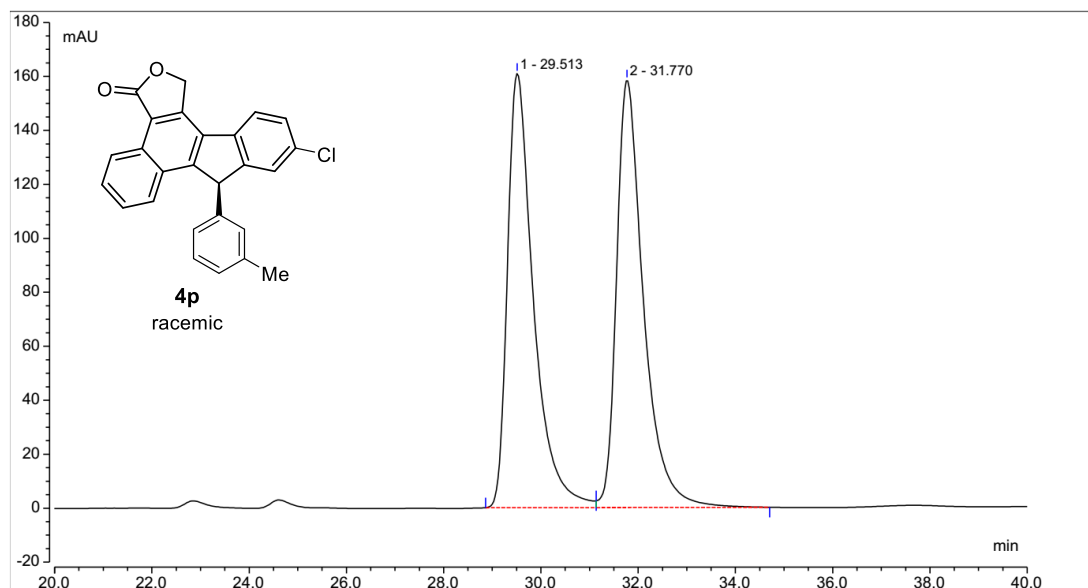

| Entry | RT min | Area mAU*min | Height mAU | % Area % | % Height % |
|-------|--------|--------------|------------|----------|------------|
| 1     | 29.513 | 99.704       | 160.936    | 49.51    | 50.39      |
| 2     | 31.770 | 101.661      | 158.438    | 50.49    | 49.61      |

**Supplementary Figure 129. HPLC trace for (*R*)-10-Chloro-8-(*m*-tolyl)-1*H*-benzo[1,2]fluoreno[3,4-*c*]furan-3(8*H*)-one (*rac*-4p)**

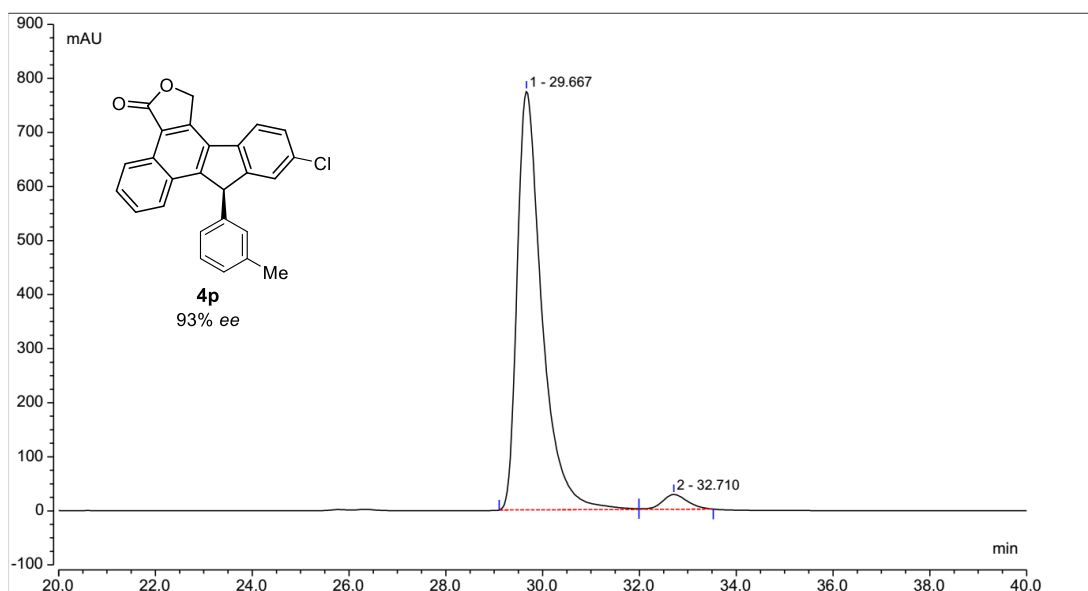

| Entry | RT min | Area mAU*min | Height mAU | % Area % | % Height % |
|-------|--------|--------------|------------|----------|------------|
| 1     | 29.667 | 457.605      | 774.713    | 96.51    | 96.59      |
| 2     | 32.710 | 16.567       | 27.386     | 3.49     | 3.41       |

**Supplementary Figure 130. HPLC trace for (*R*)-10-Chloro-8-(*m*-tolyl)-1*H*-benzo[1,2]fluoreno[3,4-*c*]furan-3(8*H*)-one (4p)**

Conditions: hexane/2-propanol = 92:08

Flow rate = 1.0 mL/min,  $\lambda = 272$  nm, Chiral IA-3

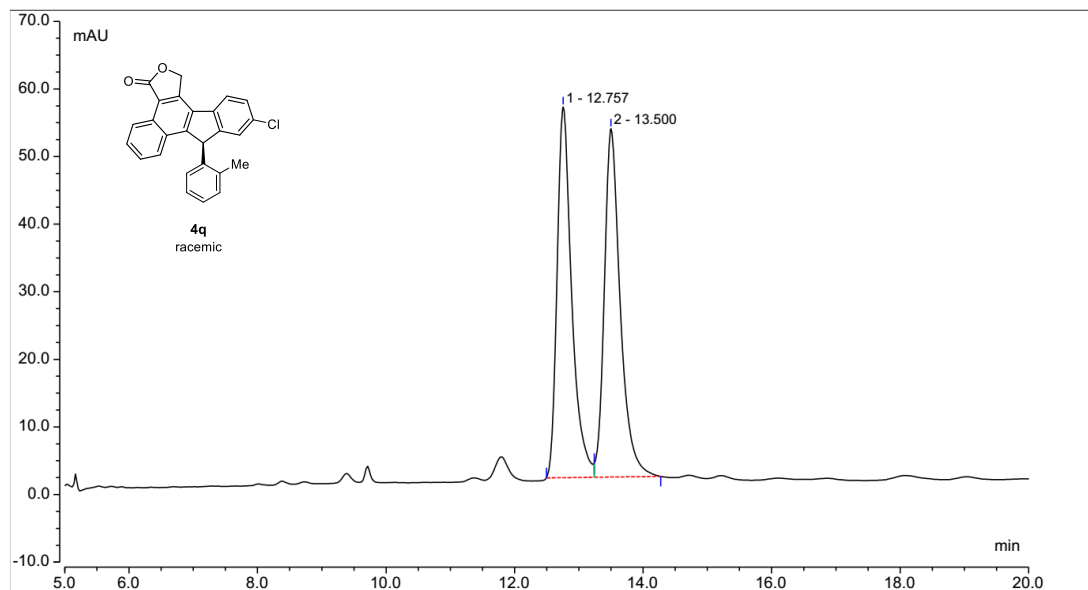

| Entry | RT min | Area mAU*min | Height mAU | % Area % | % Height % |
|-------|--------|--------------|------------|----------|------------|
| 1     | 12.757 | 14.503       | 54.827     | 49.40    | 51.56      |
| 2     | 13.500 | 14.854       | 51.505     | 50.60    | 48.44      |

Supplementary Figure 131. HPLC trace for (*R*)-10-Chloro-8-(*o*-tolyl)-1*H*-benzo[1,2]fluoreno[3,4-*c*]furan-3(*8H*)-one (*rac*-4q)

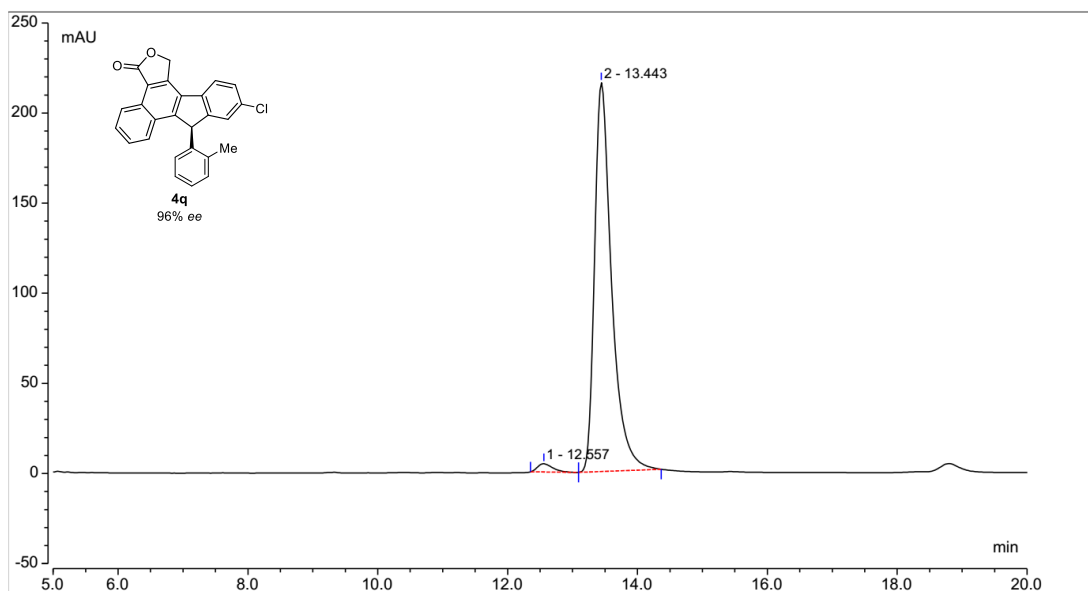

| Entry | RT min | Area mAU*min | Height mAU | % Area % | % Height % |
|-------|--------|--------------|------------|----------|------------|
| 1     | 12.557 | 1.237        | 4.575      | 1.85     | 2.08       |
| 2     | 13.443 | 65.467       | 215.780    | 98.15    | 97.92      |

Supplementary Figure 132. HPLC trace for (*R*)-10-Chloro-8-(*o*-tolyl)-1*H*-benzo[1,2]fluoreno[3,4-*c*]furan-3(*8H*)-one (4q)

Conditions: hexane/2-propanol/ethanol=98.5:0.75:0.75

Flow rate = 1.0 mL/min,  $\lambda = 272$  nm, Chiral IB-3

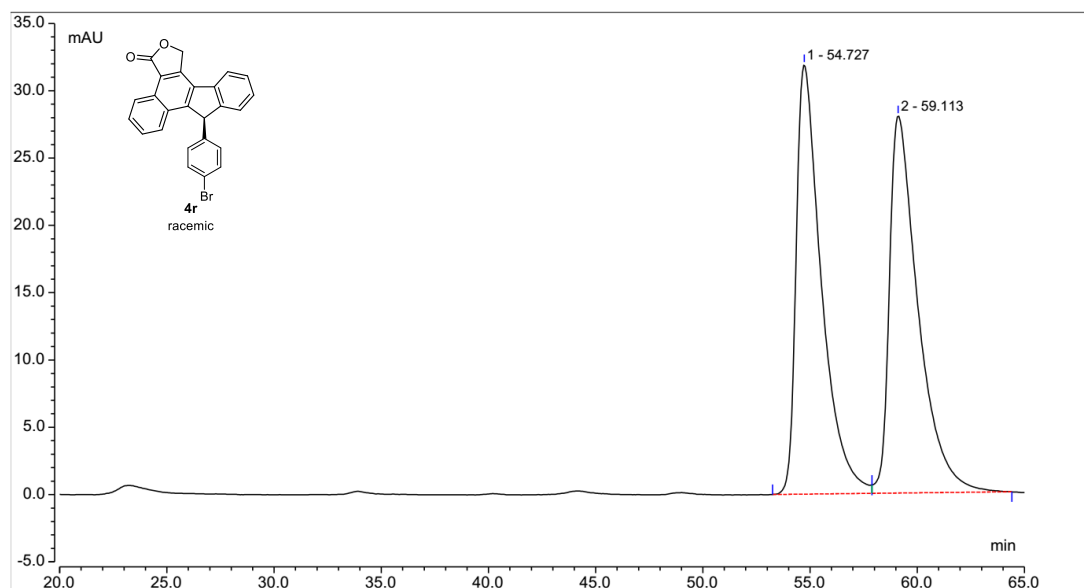

| Entry | RT min | Area mAU*min | Height mAU | % Area % | % Height % |
|-------|--------|--------------|------------|----------|------------|
| 1     | 54.727 | 43.470       | 31.906     | 49.96    | 53.24      |
| 2     | 59.113 | 43.533       | 28.027     | 50.04    | 46.76      |

**Supplementary Figure 133. HPLC trace for (*R*)-8-(4-Bromophenyl)-1*H*-benzo[1,2]fluoreno[3,4-*c*]furan-3(8*H*)-one (*rac*-4r)**

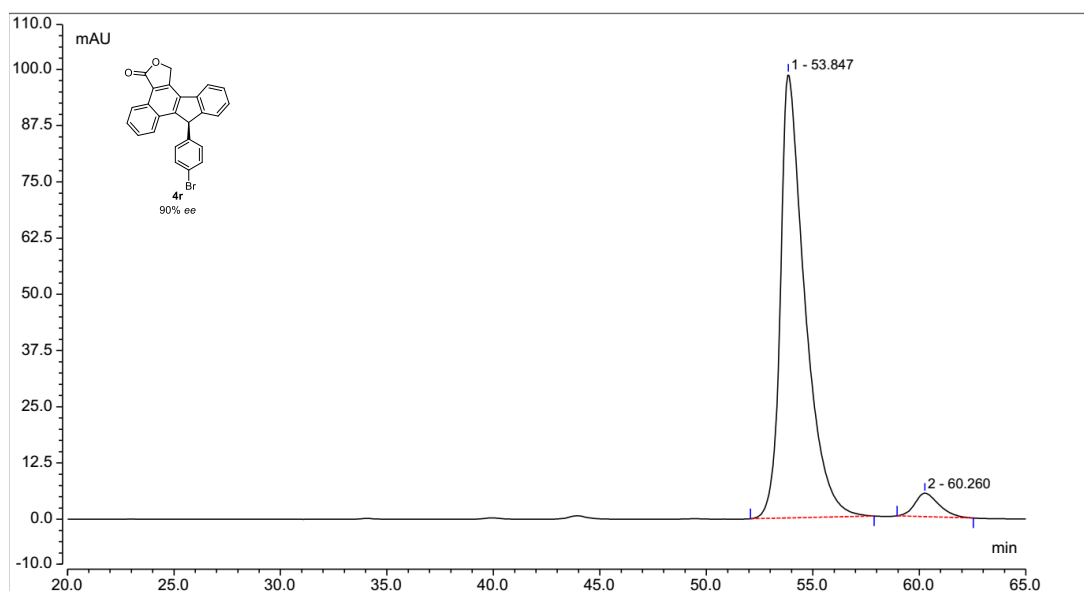

| Entry | RT min | Area mAU*min | Height mAU | % Area % | % Height % |
|-------|--------|--------------|------------|----------|------------|
| 1     | 53.847 | 131.100      | 98.664     | 95.01    | 94.99      |
| 2     | 60.260 | 6.881        | 5.209      | 4.99     | 5.01       |

**Supplementary Figure 134. HPLC trace for (*R*)-8-(4-Bromophenyl)-1*H*-benzo[1,2]fluoreno[3,4-*c*]furan-3(8*H*)-one (4r)**

Conditions: hexane/2-propanol/ethanol= 92:08

Flow rate = 1.0 mL/min,  $\lambda = 272$  nm, Chiral IA-3

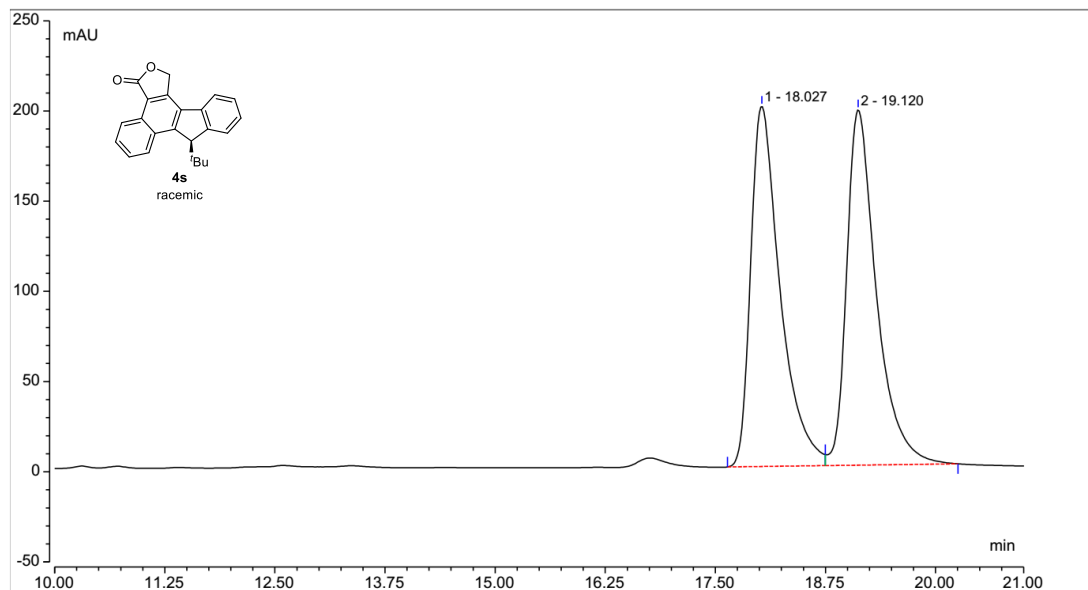

**Supplementary Figure 135. HPLC trace for 8-(*tert*-Butyl)-10-chloro-1*H*-benzo[1,2]fluoreno[3,4-*c*]furan-3(8*H*)-one (*rac*-4s)**

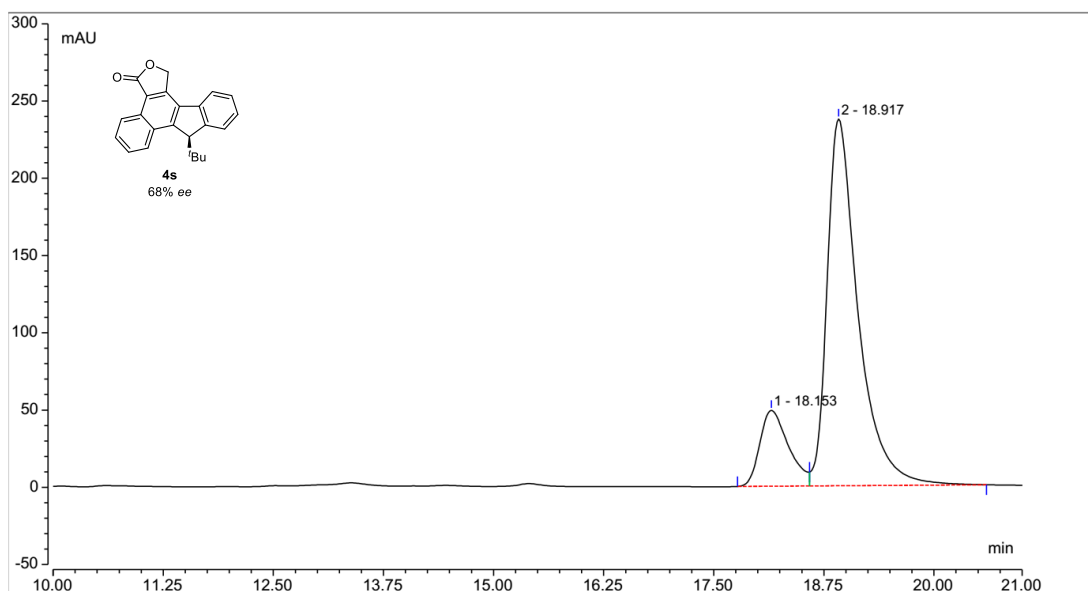

**Supplementary Figure 136. HPLC trace for (*R*)-8-(*tert*-Butyl)-10-chloro-1*H*-benzo[1,2]fluoreno[3,4-*c*]furan-3(8*H*)-one (4s)**



Conditions: hexane/2-propanol = 91:09

Flow rate = 1.0 mL/min,  $\lambda$  = 272 nm, Chiral IA-3

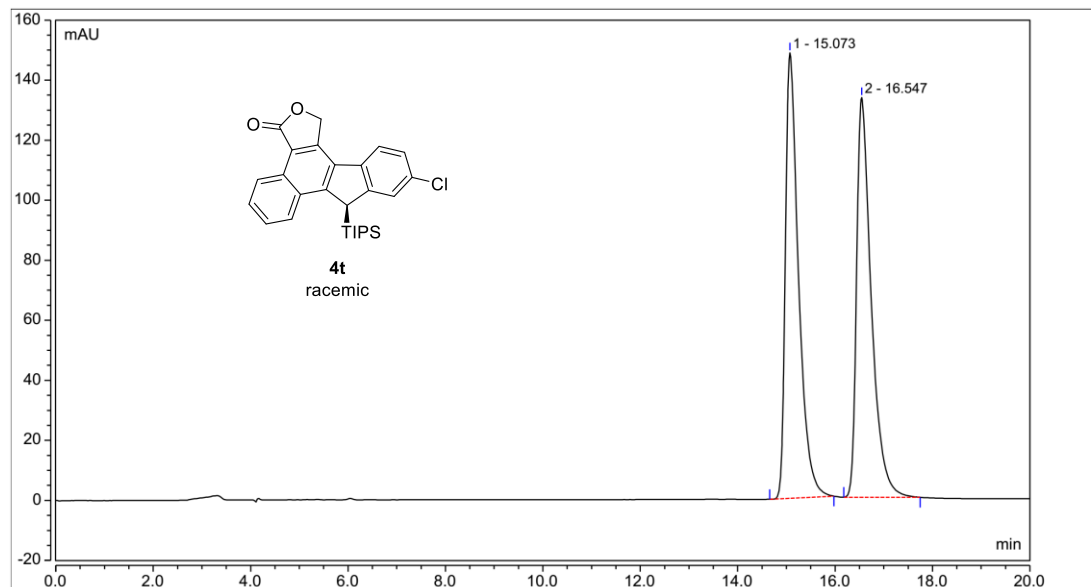

| Entry | RT<br>min | Area<br>mAU*min | Height<br>mAU | % Area<br>% | % Height<br>% |
|-------|-----------|-----------------|---------------|-------------|---------------|
| 1     | 15.073    | 46.192          | 148.434       | 49.90       | 52.71         |
| 2     | 16.547    | 46.373          | 133.154       | 50.10       | 47.29         |

Supplementary Figure 137. HPLC trace for 10-Chloro-8-(triisopropylsilyl)-1H-benzo[1,2]fluoreno[3,4-c]furan-3(8H)-one (*rac*-4t)

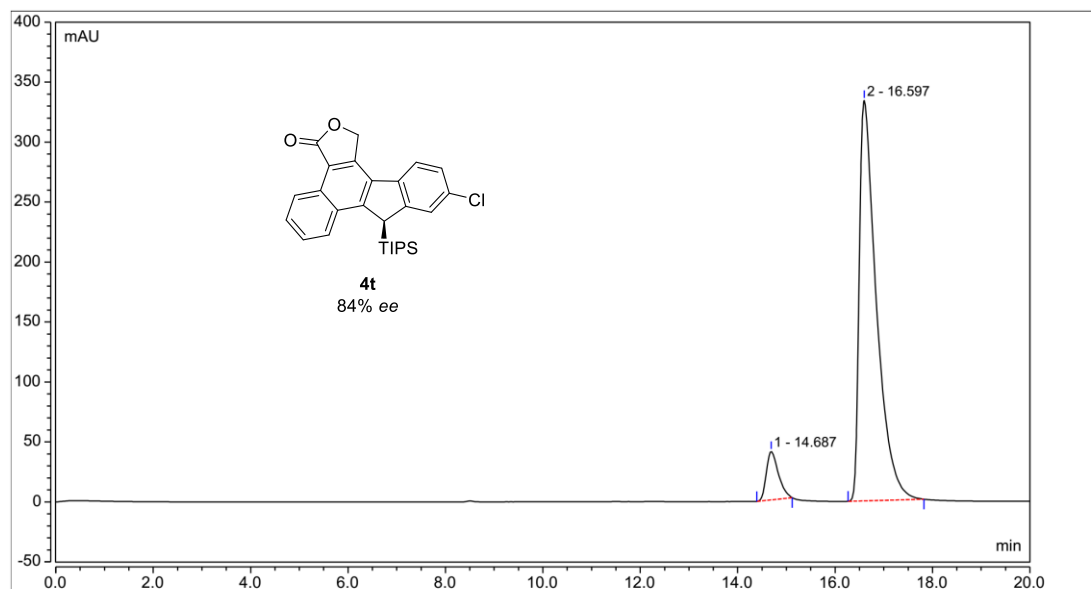

| Entry | RT<br>min | Area<br>mAU*min | Height<br>mAU | % Area<br>% | % Height<br>% |
|-------|-----------|-----------------|---------------|-------------|---------------|
| 1     | 14.687    | 11.609          | 40.394        | 7.87        | 10.80         |
| 2     | 16.597    | 135.928         | 333.789       | 92.13       | 89.20         |

Supplementary Figure 138. HPLC trace for (*R*)-10-Chloro-8-(triisopropylsilyl)-1H-benzo[1,2]fluoreno[3,4-c]furan-3(8H)-one (4t)

### Stability Study of 4c (Solid stored at 0 °C)

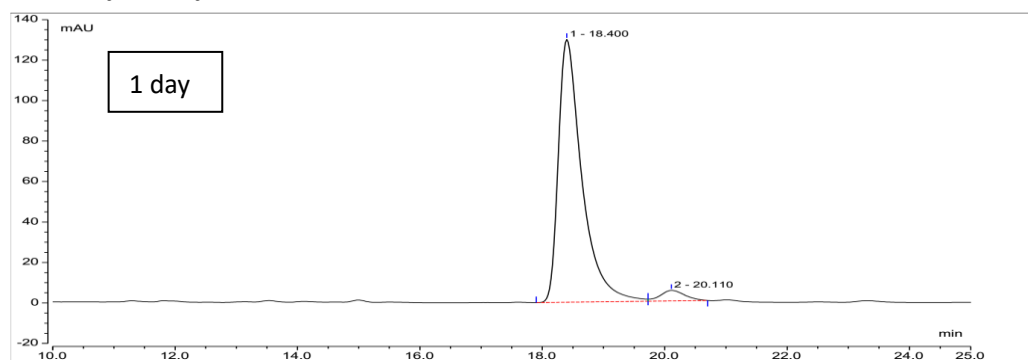

| Entry | RT min | Area mAU*min | Height mAU | % Area % | % Height % |
|-------|--------|--------------|------------|----------|------------|
| 1     | 18.400 | 57.907       | 129.849    | 96.00    | 96.15      |
| 2     | 20.110 | 2.414        | 5.202      | 4.00     | 3.85       |

**Supplementary Figure 139. HPLC trace for (R)-10-Bromo-8-phenyl-1H-benzo[1,2]fluoreno[3,4-c]furan-3(8H)-one (4c) stored at 0 °C for 1 day**

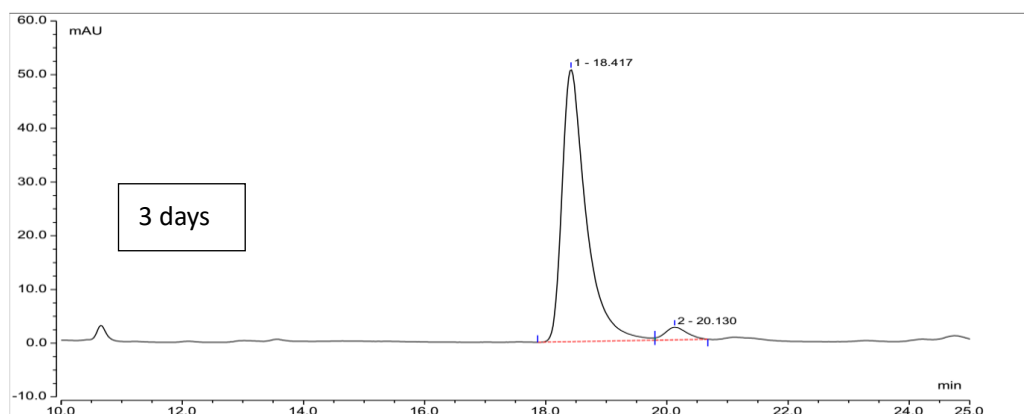

| Entry | RT min | Area mAU*min | Height mAU | % Area % | % Height % |
|-------|--------|--------------|------------|----------|------------|
| 1     | 18.417 | 23.275       | 50.709     | 95.87    | 95.57      |
| 2     | 20.130 | 1.002        | 2.350      | 4.13     | 4.43       |

**Supplementary Figure 140. HPLC trace for (R)-10-Bromo-8-phenyl-1H-benzo[1,2]fluoreno[3,4-c]furan-3(8H)-one (4c) stored at 0 °C for 3 days**

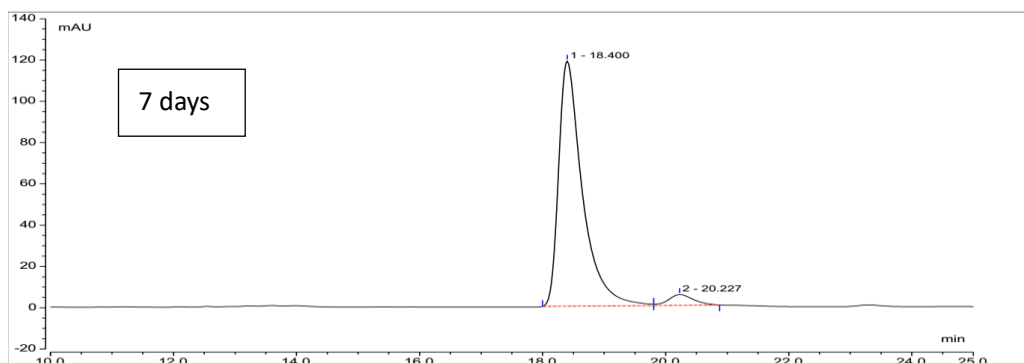

| Entry | RT min | Area mAU*min | Height mAU | % Area % | % Height % |
|-------|--------|--------------|------------|----------|------------|
| 1     | 18.400 | 53.041       | 118.815    | 95.53    | 95.77      |
| 2     | 20.227 | 2.484        | 5.250      | 4.47     | 4.23       |

**Supplementary Figure 141. HPLC trace for (R)-10-Bromo-8-phenyl-1H-benzo[1,2]fluoreno[3,4-c]furan-3(8H)-one (4c) stored at 0 °C for 7 day**

## Crystallographic Data for 4b

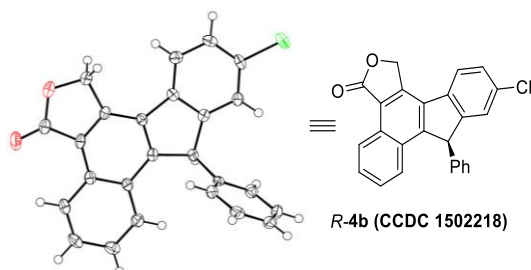

---

|                        |                                                   |                                                   |                  |
|------------------------|---------------------------------------------------|---------------------------------------------------|------------------|
| Bond precision:        | C-C = 0.0039 Å                                    | Wavelength=0.71073                                |                  |
| Cell:                  | a=6.2562 (16)                                     | b=7.8851 (19)                                     | c=9.446 (2)      |
|                        | alpha=77.776 (8)                                  | beta=76.728 (8)                                   | gamma=80.556 (8) |
| Temperature:           | 296 K                                             |                                                   |                  |
|                        | Calculated                                        | Reported                                          |                  |
| Volume                 | 439.97 (18)                                       | 439.96 (19)                                       |                  |
| Space group            | P 1                                               | P 1                                               |                  |
| Hall group             | P 1                                               | P 1                                               |                  |
| Moiety formula         | C <sub>25</sub> H <sub>15</sub> Cl O <sub>2</sub> | C <sub>25</sub> H <sub>15</sub> Cl O <sub>2</sub> |                  |
| Sum formula            | C <sub>25</sub> H <sub>15</sub> Cl O <sub>2</sub> | C <sub>25</sub> H <sub>15</sub> Cl O <sub>2</sub> |                  |
| Mr                     | 382.82                                            | 382.82                                            |                  |
| Dx, g cm <sup>-3</sup> | 1.445                                             | 1.445                                             |                  |
| Z                      | 1                                                 | 1                                                 |                  |
| Mu (mm <sup>-1</sup> ) | 0.236                                             | 0.236                                             |                  |
| F000                   | 198.0                                             | 198.0                                             |                  |
| F000'                  | 198.23                                            |                                                   |                  |
| h, k, lmax             | 7, 9, 11                                          | 7, 9, 11                                          |                  |
| Nref                   | 3588 [ 1794]                                      | 3386                                              |                  |
| Tmin, Tmax             | 0.956, 0.972                                      | 0.954, 0.972                                      |                  |
| Tmin'                  | 0.954                                             |                                                   |                  |
| Correction method=     | # Reported T Limits: Tmin=0.954 Tmax=0.972        |                                                   |                  |
| AbsCorr =              | NONE                                              |                                                   |                  |
| Data completeness=     | 1.89/0.94                                         | Theta (max)= 26.330                               |                  |
| R(reflections)=        | 0.0381 ( 3043)                                    | wR2(reflections)= 0.0887 ( 3386)                  |                  |
| S =                    | 1.051                                             | Npar= 253                                         |                  |

---

Supplementary Figure 142. Crystallographic Data for 4b

## Computational Study

### a) Computational details.

All DFT calculations were performed with the Gaussian 09 software package.<sup>10</sup> For racemic reaction, geometry optimizations of all the minima and transition states involved were carried out using the pure functional PBE.<sup>11,12</sup> The SDD basis set<sup>13</sup> (Stuttgart/Dresden ECP) was used for rhodium and the 6-31G(d) basis set<sup>14</sup> for the other atoms. Frequency calculations at the same level were performed to validate each structure as either a minimum or a transition state and to evaluate its zero-point energy and thermal corrections at 298 K. Solvation free energy of all the minima and transition states involved were carried out using SMD solvation model<sup>15</sup> in CH<sub>2</sub>Cl<sub>2</sub>. Based on the optimized structures, single-point energy calculations were carried out at the M06L<sup>16</sup>/6-311G(d,p)<sup>14</sup>&SDD level. Minimum-energy crossing points (MECPs) between singlet–triplet potential energy surfaces (PESs) were located with the MECP program developed by Harvey and co-workers.<sup>17</sup> The keyword “5D” was used to specify that five d-type orbitals were used for all elements in the calculations. For enantioselectivity calculations, geometry optimizations of all the minima and transition states involved were carried out using the pure functional PBE together with Grimme’s D3 correction.<sup>18</sup> The Def2-SVP<sup>19</sup> and corresponding fitting basis set W06<sup>20</sup> was used for geometry optimizations. Frequency calculations at the same level were performed to validate each structure as either a minimum or a transition state and to evaluate its zero-point energy and thermal corrections at 298 K. Based on the optimized structures, single-point energy calculations were carried out at the SMD(toluene)-M06L-D3<sup>18</sup>/Def2-TZVP<sup>19</sup> level. We used standard state of 1.0 mol/L at 298 K for all species and therefore a 1.89 kcal/mol correction was used for processes involving two molecules to a complex/intermediate or a transition state or vice versa. All discussed energies were Gibbs free energies unless otherwise specified. 3D structure was prepared with CYLview.<sup>21</sup>

### b) Computed energies for the stationary points

#### Supplementary Table 2 Thermal corrections to Gibbs energies (TCGs) and single-point energies (SPEs) of asymmetric reaction 1.

|      | TCG <sup>a</sup> (a.u.) | SPE <sup>b</sup> (a.u.) |
|------|-------------------------|-------------------------|
| TS-S | 1.009466                | -6342.535193            |
| TS-R | 1.008674                | -6342.530138            |

<sup>a</sup>Computed at the PBE-D3/Def2-SVP/W06 level.

<sup>b</sup>Computed at the SMD(toluene)-M06L-D3/Def2-TZVP level.

**Supplementary Table 3, Thermal corrections to Gibbs energies (TCGs) and single-point energies (SPEs) of racemic tandem reaction 2.**

|                                     | TCG <sup>a</sup> (a.u.) | SPE <sup>b</sup> (a.u.) |
|-------------------------------------|-------------------------|-------------------------|
| N <sub>2</sub>                      | -0.01309                | -109.5365303            |
| 3a                                  | 0.269452                | -1222.269567            |
| Rh <sub>2</sub> (HCOO) <sub>4</sub> | 0.057691                | -978.1930657            |
| 4a                                  | 0.279876                | -1112.943758            |
| IN1                                 | 0.349185                | -2200.477255            |
| IN2                                 | 0.344224                | -2090.948716            |
| IN3                                 | 0.34807                 | -2090.966361            |
| <sup>3</sup> IN3                    | 0.345651                | -2090.96155             |
| IN4                                 | 0.350272                | -2091.017276            |
| IN5                                 | 0.35233                 | -2091.026607            |
| <sup>3</sup> IN5                    | 0.350947                | -2091.042874            |
| IN6                                 | 0.357107                | -2091.089551            |
| TS1                                 | 0.347239                | -2200.460962            |
| TS2                                 | 0.346035                | -2090.942823            |
| TS3                                 | 0.346459                | -2090.947218            |
| <sup>3</sup> TS3                    | 0.346365                | -2090.963745            |
| TS4                                 | 0.352621                | -2091.003573            |
| TS5                                 | 0.352387                | -2091.029307            |
| <sup>3</sup> TS5                    | 0.351058                | -2091.041684            |
| TS6                                 | 0.355555                | -2091.053977            |

<sup>a</sup>Computed at the PBE/6-31G(d)&SDD level.

<sup>b</sup>Computed at the SMD(DCM)-M06L/6-311G(d,p)&SDD level.

**Supplementary Table 4 Single-point energies (SPEs) of MECP**

|        | SPE <sup>a</sup> (a.u.) |
|--------|-------------------------|
| IN3    | -2088.431784            |
| MECP-1 | -2088.424028            |
| IN5    | -2088.498593            |
| MECP-2 | -2088.498507            |

<sup>a</sup>Computed at the PBE/6-31G(d)&SDD level.

**Supplementary Table 5 Thermal corrections to Gibbs energies (TCGs) and single-point energies (SPEs) of asymmetric reaction 2**

|                  | TCG <sup>a</sup> (a.u.) | SPE <sup>b</sup> (a.u.) |
|------------------|-------------------------|-------------------------|
| TS- <i>pro-S</i> | 1.069216                | -6623.566934            |
| TS- <i>pro-R</i> | 1.069114                | -6623.564693            |

|                            |          |              |
|----------------------------|----------|--------------|
| <i>c</i> -INT3             | 1.074701 | -6514.185712 |
| <i>c</i> -TS-INT3-CH       | 1.073512 | -6514.146712 |
| <i>c</i> -TS-INT3-Rotation | 1.079397 | -6514.131254 |

<sup>a</sup>Computed at the PBE-D3/Def2-SVP/W06 level.

<sup>b</sup>Computed at the SMD(toluene)-M06L-D3/Def2-TZVP level.

**c) 3D structures of key intermediates for racemic reaction 2**

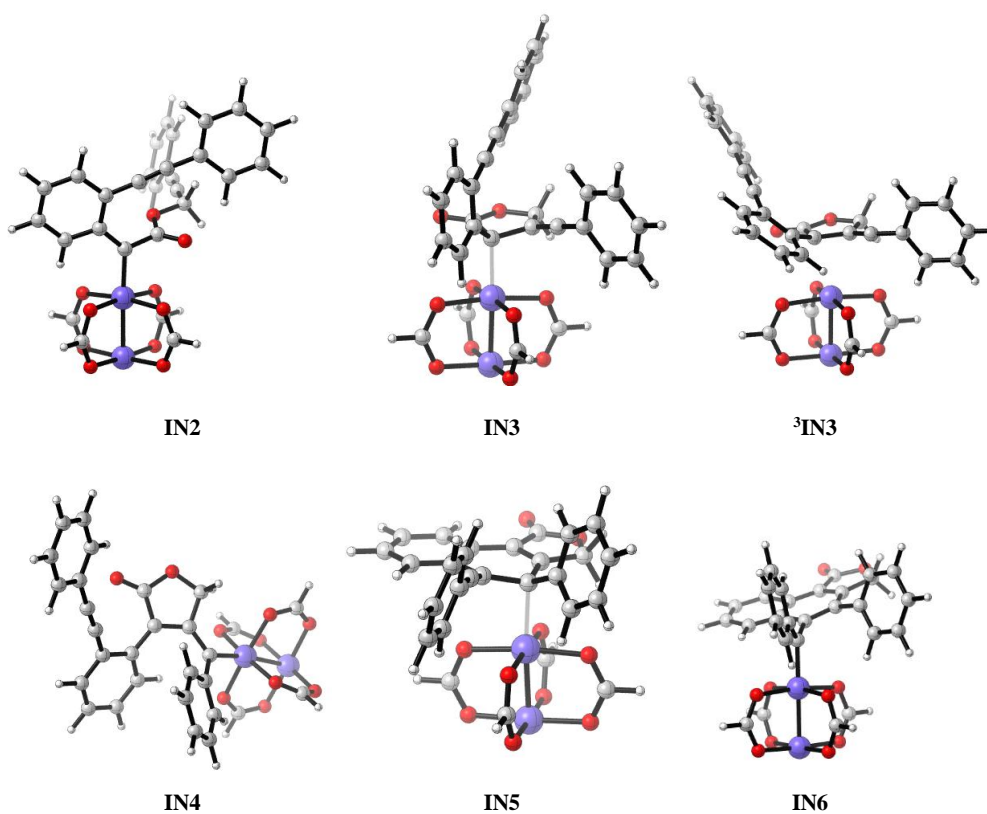

Supplementary Figure 143. 3D structures of key intermediates for reaction 2.

**d) Orbital analysis of triplet intermediate <sup>3</sup>IN3**

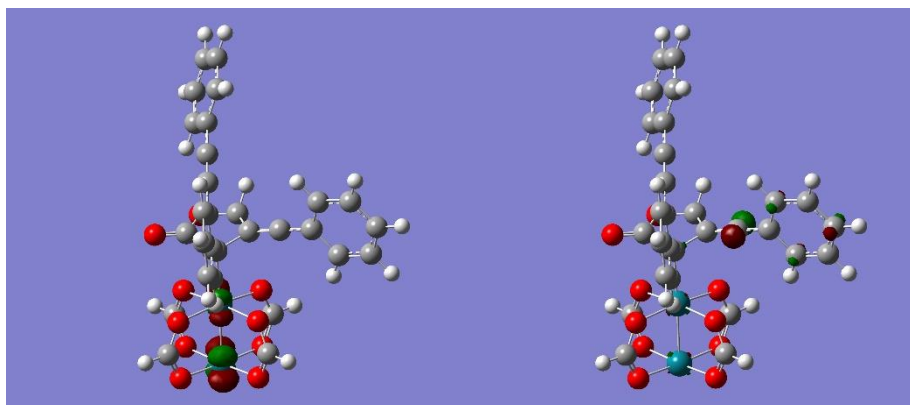

Supplementary Figure 144. HOMO and LUMO of IN3.

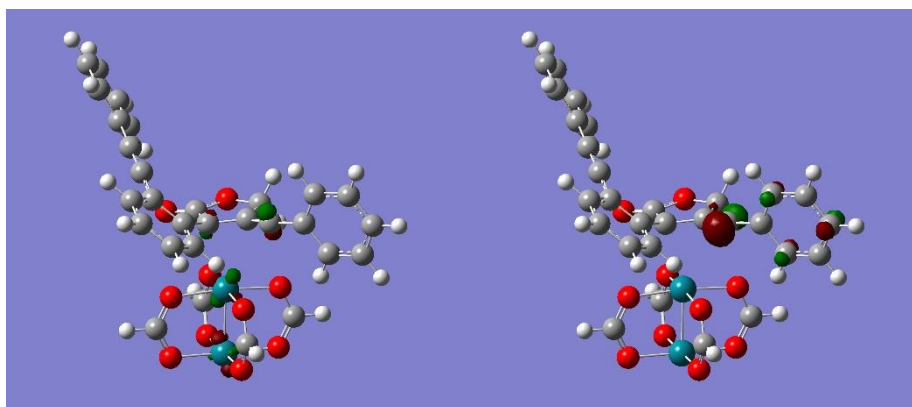

Supplementary Figure 145. SOMOs of  $^3\text{IN3}$ .

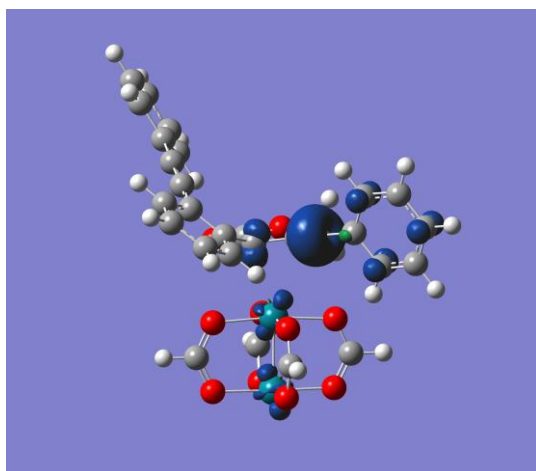

Supplementary Figure 146. Spin density of  $^3\text{IN3}$ .

#### e) Regioselectivity discussion for reactions of substrates **1i** and **3g**

DFT calculation result show that for substrate **1i**, the para-position C-H insertion TS-*p*F-DDC-CH is 3.5 kcal/mol favored than the ortho-position C-H insertion TS-*o*F-DDC-CH, so only product **2i** can be obtained. For substrate **3g**, the C-H insertion barriers only differs by 0.7 kcal/mol, suggesting that a mixture of **4g** and **4g'** should be obtained. Both of these calculations agreed with experiments.

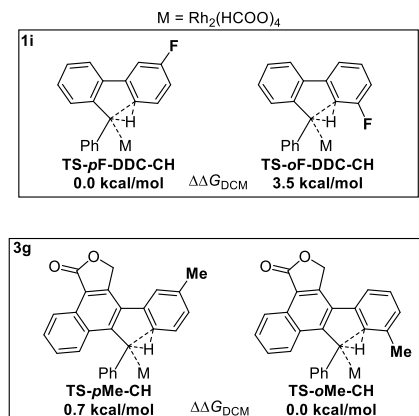

**Supplementary Figure 147. Regioselectivity calculation results of substrates 1i and 3g.**

**Supplementary Table 6 Thermal corrections to Gibbs energies (TCGs) and single-point energies (SPEs) of regioselectivity calculation of substrates 1i and 3g**

|                       | TCG <sup>a</sup> (a.u.) | SPE <sup>b</sup> (a.u.) |
|-----------------------|-------------------------|-------------------------|
| TS- <i>p</i> F-DDC-CH | 0.286346                | -1810.160774            |
| TS- <i>o</i> F-DDC-CH | 0.286882                | -1810.155733            |
| TS- <i>p</i> Me-CH    | 0.379838                | -2130.644121            |
| TS- <i>o</i> Me-CH    | 0.381254                | -2130.644393            |

<sup>a</sup>Computed at the PBE/6-31G(d)&SDD level.

<sup>b</sup>Computed at the SMD(toluene)-M06L/Def2-TZVP level.

#### **f) Reactivity discussion of substrate 3h:**

For the substrate 3h, a higher temperature is needed for C-H insertion reaction due to the steric repulsion between the methyl group and lactone ring in the C-H insertion transition state, as suggested by DFT calculations shown below. The C-H insertion step has an activation barrier about 5 kcal/mol higher than that for substrate 3a when we used a model catalyst (we speculated that, if a real catalyst was used, this energy difference should become lower, about 2 to 3 kcal/mol). We hypothesized that the reaction of 3h initially gave higher *ee*, because this was set up in the first step of the catalytic cycle and there was no difference from substrate 3a. But the product could then undergo racemization at 60 °C. One support for this hypothesis is that product 4c, heated at 80 °C for 12 hours, underwent racemization from 90% *ee* to 30% *ee*.



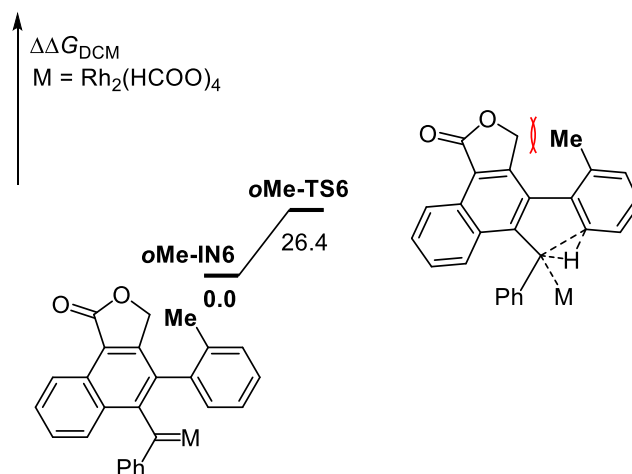

**Supplementary Figure 148. C-H Insertion reaction step for substrate 3h.**

**Supplementary Table 7 Thermal corrections to Gibbs energies (TCGs) and single-point energies (SPEs) of C-H insertion reaction of substrate 3h**

|                 | TCG <sup>a</sup> (a.u.) | SPE <sup>b</sup> (a.u.) |
|-----------------|-------------------------|-------------------------|
| <i>o</i> Me-IN6 | 0.38275                 | -2130.410753            |
| <i>o</i> Me-TS6 | 0.382142                | -2130.368067            |

<sup>a</sup>Computed at the PBE/6-31G(d)&SDD level.

<sup>b</sup>Computed at the SMD(DCM)-M06L/6-311G(d,p)&SDD level.

### g) Estimation of the rotation barrier of axial chiral intermediate *c*-INT3

Considering that the C-H insertion step is the rate-determine step in this tandem reaction, we calculated the barriers of C-H insertion and rotation of *c*-INT3 in the real system (simplifying the chiral catalyst may cause underestimation of rotation barrier). The barrier of final C-H insertion reaction is 23.7 kcal/mol. The rotation barrier shown below is 13.4 kcal/mol higher than that required for the C-H insertion reaction, so the chiral transfer can be realized from the transient axial chirality in intermediate *c*-INT3.

In the rotation transition state structure for intermediate *c*-INT3, remarkable distortion of chiral dirhodium catalyst and substrate part can be observed due to the strong repulsion of two aryl rings, which is shown below.

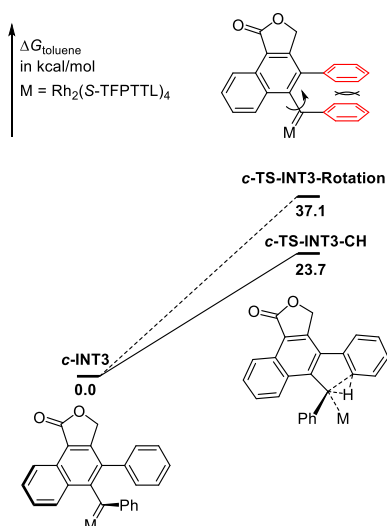

**Supplementary Figure 149. Rotation vs Csp<sup>2</sup>-H insertion.**

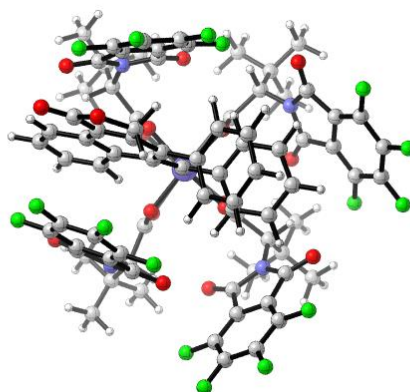

**Supplementary Figure 150. 3D structure of Rotation transition state of *c*-INT3.**

#### **h) Possibility of Catalyst dissociation from intermediates**

We have considered that catalyst could dissociate from some intermediates and then rebound back to form these complexes again for further transformations, which could decrease the enantioselectivity. **IN2**, **IN4**, and **IN6** are strong complexes of carbenes with catalyst, and catalyst dissociations from these intermediates are not possible. Other intermediates such as **IN3** and **IN5** are not possible too, because they can quickly be converted to **IN4** and **IN6** with almost no barriers (see Figure 3). Actually we have computed these possibilities for these two intermediates. **IN3** cannot dissociate to carbene and catalyst because our calculations by elongating Rh-C bond in **IN3** leads to **IN4**, same as the MECF process in Figure 3. For **IN5**, dissociation of catalyst is slower than MECF shown in Figure 3.

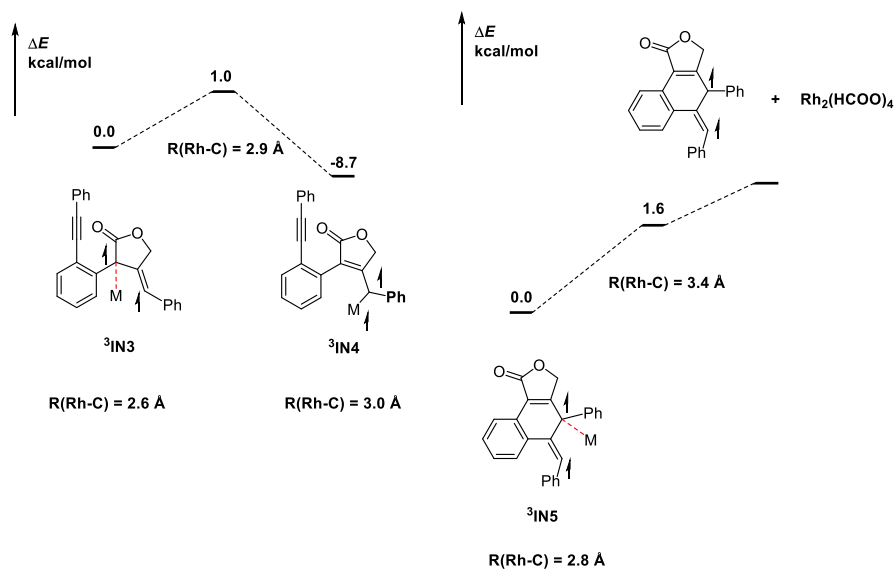

Supplementary Figure 151. Scan result of potential energy surface

i) 3D Structures of axial chiral intermediates in real system

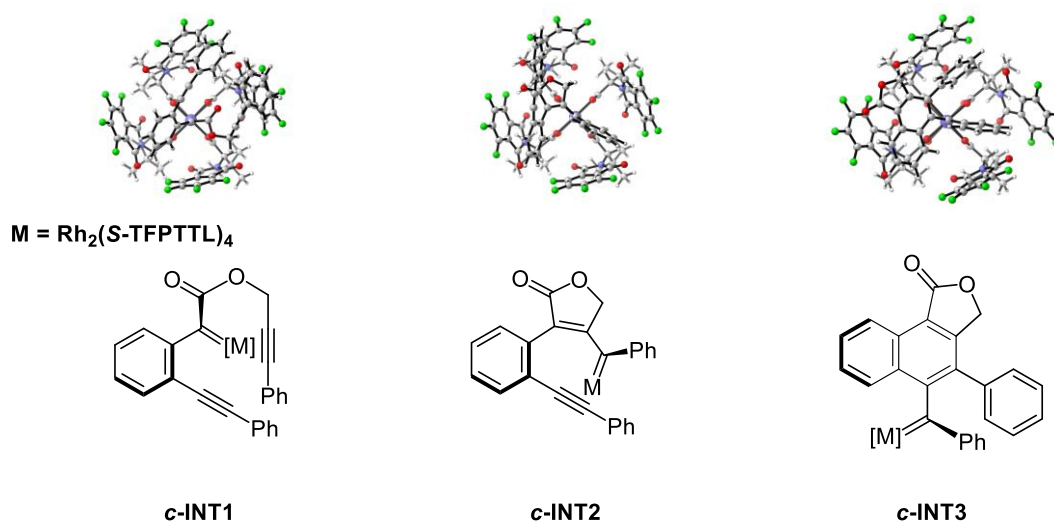

Supplementary Figure 152. 3D structures of key chiral intermediates.

## Supplementary References

1. Zhao, Z., He, B., Nie, H., Chen, B., Lu, P., Qin, A. & Tang, B. Stereoselective synthesis of folded luminogens with arene–arene stacking interactions and aggregation-enhanced emission. *Chem. Commun.* **50**, 1131–1133 (2014).
2. Agheshina, A., Chesnokov, G., Topchiy, M., Alabugin, I., Nechaev M. S. & Asachenko. A. F. Making endo-cyclizations favorable again: a conceptually new synthetic approach to benzotriazoles via azide group directed lithiation/cyclization of 2-azidoaryl bromides. *Org. Biomol. Chem.* **17**, 4523–4534 (2019).
3. Gazis, T., Dasgupta, A., Hill, M., Rawson, J., Wirth, T. & Melen, R. Reactions of hydrazones and hydrazides with Lewis acidic boranes. *Dalton Trans.* **48**, 12391–12395 (2019).
4. Peng, C., Cheng, J. & Wang, J. Sequential copper(I)-catalyzed reaction of amines with *o*-acetylenyl-substituted phenyldiazoacetates. *Adv. Synth. Catal.* **350**, 2359–2364 (2008).
5. Badry, M., Kariuki, B., Knight, D. W. & Mohammed, F. K. 6-Exo versus 7-endo lactonizations of 2-(alkynyl)phenylacetic acids. *Tetrahedron Lett.* **50**, 1385–1388 (2009).
6. Zheng, Y., Mao, J., Weng, Y., Zhang, X. & X. Xu, Cyclopentadiene construction via Rh-catalyzed carbene/alkyne metathesis terminated with intramolecular formal [3 + 2] cycloaddition. *Org. Lett.* **17**, 5638–5641 (2015).
7. Li, C., Brideau, C., Chan, C., Savoie, C., Claveau, D., Charleson, S., Gordon, R., Greig, G., Gauthier, J., Lau, C. K., Riendeau, D., Terien, M., Wong, E. & Prasit, P. Pyridazinones as selective cyclooxygenase-2 inhibitors. *Bioorg. Med. Chem Lett.* **13**, 597–600 (2003).
8. Meng, C., Ni, L., Worsencroft, K. J., Ye, Z., Weingarten, M. D., Simpson, J. E., Skudlarek, J. W., Marino, E. M., Suen, K., Kunsch, C., Souder, A., Howard, R. B., Sundell, C. L., Wasserman, M. A. & Sikorski, J. A. Carboxylated, heteroaryl-substituted chalcones as inhibitors of vascular cell adhesion molecule-1 expression for use in chronic inflammatory diseases. *J. Med. Chem.* **50**, 1304–1315 (2007).
9. Yao, R., Rong, G., Yan, B., Qiu, L. & Xu, X. Dual-Functionalization of alkynes via copper-catalyzed carbene/alkyne metathesis: a direct access to the 4-carboxyl quinolines. *ACS Catal.* **6**, 1024–1027 (2016).
10. Frisch, M. J.; Trucks, G. W.; Schlegel, H. B.; Scuseria, G. E.; Robb, M. A.; Cheeseman, J. R.; Scalmani, G.; Barone, V.; Mennucci, B.; Petersson, G. A.; Nakatsuji, H.; Caricato, M.; Li, X.; Hratchian, H. P.; Izmaylov, A. F.; Bloino, J.; Zheng, G.; Sonnenberg, J. L.; Hada, M.; Ehara, M.; Toyota, K.; Fukuda, R.; Hasegawa, J.; Ishida, M.; Nakajima, T.; Honda, Y.; Kitao, O.; Nakai, H.; Vreven, T.; Montgomery, J. A., Jr.; Peralta, J. E.; Ogliaro, F.; Bearpark, M.; Heyd, J. J.; Brothers, E.; Kudin, K. N.; Staroverov, V. N.; Kobayashi, R.; Normand, J.; Raghavachari, K.; Rendell, A.; Burant, J. C.; Iyengar, S. S.; Tomasi, J.; Cossi, M.; Rega, N.; Millam, J. M.; Klene, M.; Knox, J. E.; Cross, J. B.; Bakken, V.; Adamo, C.; Jaramillo, J.; Gomperts, R.; Stratmann, R. E.; Yazyev, O.; Austin, A. J.; Cammi, R.; Pomelli, C.; Ochterski, J. W.; Martin, R. L.; Morokuma, K.; Zakrzewski, V. G.; Voth, G. A.; Salvador, P.; Dannenberg, J. J.; Dapprich, S.; Daniels, A. D.; Farkas, Ö.; Foresman, J. B.; Ortiz, J. V.; Cioslowski, J.; Fox, D. J. *Gaussian 09, Revision D.01*; Gaussian, Inc.: Wallingford, CT, 2009.
11. Perdew, J. P., Burke, K. & Ernzerhof, M. Generalized gradient approximation made simple. *Phys. Rev. Lett.* **77**, 3865–3868 (1996).

12. Perdew, J. P., Burke, K. & Ernzerhof, M. Generalized gradient approximation made simple. *Phys. Rev. Lett.* **78**, 1396 (1997).
13. Andrae, D., Haeussermann, U., Dolg, M., Stoll, H. & Preuss, H. Energy-adjusted *ab initio* pseudopotentials for the second and third row transition elements. *Theor. Chem. Acc.* **77**, 123–141 (1990).
14. Hehre, W. J., Radom, L., Schleyer, P. R. & J. A. Pople, *Ab Initio molecular orbital theory*; Wiley: New York, pp. 379 (1986).
15. Marenich, A. V., Cramer, C. J. & Truhlar, D. G. Universal solvation model based on solute electron density and a continuum model of the solvent defined by the bulk dielectric constant and atomic surface tensions. *J. Phys. Chem. B.* **113**, 6378–6396 (2009).
16. Zhao, Y. & Truhlar, D. G. A new local density functional for main-group thermochemistry, transition metal bonding, thermochemical kinetics, and noncovalent interactions. *J. Chem. Phys.* **125**, 194101–194118 (2006).
17. Harvey, J. N., Aschi, M., Schwarz, H. & Koch, W. The singlet and triplet states of phenyl cation. A hybrid approach for locating minimum energy crossing points between non-interacting potential energy surfaces. *Theor. Chem. Acc.* **99**, 95–99 (1998).
18. Grimme, S., Antony, J., Ehrlich, S. & Krieg, H. A consistent and accurate *ab initio* parametrization of density functional dispersion correction (DFT-D) for the 94 elements H–Pu. *J. Chem. Phys.* **132**, 154104–154122 (2010).
19. Weigend, F. & Ahlrichs, R. Balanced basis sets of split valence, triple zeta valence and quadruple zeta valence quality for H to Rn: Design and assessment of accuracy. *Phys. Chem. Chem. Phys.* **7**, 3297–3305 (2005).
20. Weigend, F. Accurate coulomb-fitting basis sets for H to Rn. *Phys. Chem. Chem. Phys.* **8**, 1057–1065 (2006).
21. Legault, C. Y. CYLview, 1.0b; Université de Sherbrooke, (2009). <http://www.cylview.org>
