# Supplementary material for: Transient-axial-chirality controlled asymmetric rhodium-carbene C(sp2)-H functionalization for the synthesis of chiral fluorenes
Source: PubMed Central journal article supplement (PMC7217916; doi:10.1038/s41467-020-16098-8), 2020-05-12
Supplement: 41467_2020_16098_MOESM3_ESM.pdf [file 41467_2020_16098_MOESM3_ESM.pdf]

## Description of Additional Supplementary Files

File Name: Supplementary Data 1

Description: The Cartesian coordinates for the stationary points
